# Supplementary material for: Factors affecting anaemia among women of reproductive age in Nepal: a multilevel and spatial analysis
Source: PubMed Central journal article supplement — BMJ Open. 2021 Mar 29;11(3):e041982. doi: 10.1136/bmjopen-2020-041982 (PMC8009228; doi:10.1136/bmjopen-2020-041982), 2021-03-29
Supplement: bmjopen-2020-041982.draft_revisions.pdf [file bmjopen-2020-041982.draft_revisions.pdf]

# BMJ Open

BMJ Open is committed to open peer review. As part of this commitment we make the peer review history of every article we publish publicly available.

When an article is published we post the peer reviewers' comments and the authors' responses online. We also post the versions of the paper that were used during peer review. These are the versions that the peer review comments apply to.

The versions of the paper that follow are the versions that were submitted during the peer review process. They are not the versions of record or the final published versions. They should not be cited or distributed as the published version of this manuscript.

BMJ Open is an open access journal and the full, final, typeset and author-corrected version of record of the manuscript is available on our site with no access controls, subscription charges or pay-per-view fees (<http://bmjopen.bmj.com>).

If you have any questions on BMJ Open's open peer review process please email [info.bmjopen@bmj.com](mailto:info.bmjopen@bmj.com)

# BMJ Open

## Factors affecting anaemia among women of reproductive age in Nepal: a multilevel and spatial analysis

|                               |                                                                                                                                                                                                                                                                                                                                                                                                                                            |
|-------------------------------|--------------------------------------------------------------------------------------------------------------------------------------------------------------------------------------------------------------------------------------------------------------------------------------------------------------------------------------------------------------------------------------------------------------------------------------------|
| Journal:                      | <i>BMJ Open</i>                                                                                                                                                                                                                                                                                                                                                                                                                            |
| Manuscript ID                 | bmjopen-2020-041982                                                                                                                                                                                                                                                                                                                                                                                                                        |
| Article Type:                 | Original research                                                                                                                                                                                                                                                                                                                                                                                                                          |
| Date Submitted by the Author: | 23-Jun-2020                                                                                                                                                                                                                                                                                                                                                                                                                                |
| Complete List of Authors:     | Sunuwar, Dev Ram; Nepal Armed Police Force, Department of Nutrition and Dietetics<br>Singh, Devendra Raj; Asian College for Advance Studies, Department Public Health<br>Adhikari, Bipin; Nepal Community Health and Development Centre, Shrestha, Santosh ; Agricultural Technology Center, Lalitpur, Nepal, Research<br>Pradhan, Pranil; Institute of Medicine, Tribhuvan University, Department of Community Medicine and Public Health |
| Keywords:                     | PUBLIC HEALTH, Anaemia < HAEMATOLOGY, NUTRITION & DIETETICS, Maternal medicine < OBSTETRICS                                                                                                                                                                                                                                                                                                                                                |
|                               |                                                                                                                                                                                                                                                                                                                                                                                                                                            |

SCHOLARONE™  
Manuscripts

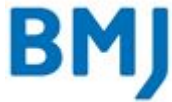

I, the Submitting Author has the right to grant and does grant on behalf of all authors of the Work (as defined in the below author licence), an exclusive licence and/or a non-exclusive licence for contributions from authors who are: i) UK Crown employees; ii) where BMJ has agreed a CC-BY licence shall apply, and/or iii) in accordance with the terms applicable for US Federal Government officers or employees acting as part of their official duties; on a worldwide, perpetual, irrevocable, royalty-free basis to BMJ Publishing Group Ltd ("BMJ") its licensees and where the relevant Journal is co-owned by BMJ to the co-owners of the Journal, to publish the Work in this journal and any other BMJ products and to exploit all rights, as set out in our [licence](#).

The Submitting Author accepts and understands that any supply made under these terms is made by BMJ to the Submitting Author unless you are acting as an employee on behalf of your employer or a postgraduate student of an affiliated institution which is paying any applicable article publishing charge ("APC") for Open Access articles. Where the Submitting Author wishes to make the Work available on an Open Access basis (and intends to pay the relevant APC), the terms of reuse of such Open Access shall be governed by a Creative Commons licence – details of these licences and which [Creative Commons](#) licence will apply to this Work are set out in our licence referred to above.

Other than as permitted in any relevant BMJ Author's Self Archiving Policies, I confirm this Work has not been accepted for publication elsewhere, is not being considered for publication elsewhere and does not duplicate material already published. I confirm all authors consent to publication of this Work and authorise the granting of this licence.

# 1 **Factors affecting anaemia among women of reproductive** 2 **age in Nepal: a multilevel and spatial analysis**

3 Dev Ram Sunuwar<sup>1\*</sup>, Devendra Raj Singh<sup>2</sup>, Bipin Adhikari<sup>3</sup>, Santosh Shrestha<sup>4</sup>, Prnil Man  
4 Singh Pradhan<sup>5</sup>

5 <sup>1</sup>Department of Nutrition and Dietetics, Nepal Armed Police Force, Kathmandu, Nepal

6 <sup>2</sup>Department of Public Health, Asian College for Advance Studies, Purbanchal University,  
7 Lalitpur, Nepal

8 <sup>3</sup>Nepal Community Health and Development Center, Kathmandu, Nepal

9 <sup>4</sup>Agricultural Technology Center, Lalitpur, Nepal

10 <sup>5</sup>Department of Community Medicine, Maharajgunj Medical Campus, Institute of Medicine,  
11 Tribhuvan University, Kathmandu, Nepal

## 12 **Corresponding author**

13 [\\*devramsunuwar@gmail.com](mailto:devramsunuwar@gmail.com)

14  
15 **Word count:** Abstract: 286; Main text: 4260; References: 68

## 16 **ABSTRACT**

17 **Objective:** The main objective of this study was to explore the factors affecting anemia among  
18 women of reproductive age (WRA) in Nepal using spatial and multilevel epidemiological  
19 analysis.

20 **Design:** This cross-sectional study analyzed the data from the 2016 Nepal demographic and  
21 health survey (NDHS 2016). The spatial analysis was performed using ArcGIS software V.10.8  
22 to identify the hot and cold spots of anaemia among WRA (15 to 49 years). Data were analyzed  
23 using multilevel mixed-effect logistic regression analysis.

1  
2  
3 24 **Setting:** Nepal  
4

5  
6 25 **Participants:** A total of 6,414 WRA were included in the analysis.  
7

8  
9 26 **Main outcome measure:** Anaemia defined by World Health Organization (WHO) as  
10  
11  
12 27 hemoglobin level less than 12g/dL in non-pregnant women and less than 11g/dL in pregnant  
13  
14 28 women.  
15

16  
17 29 **Results:** The spatial analysis showed that statistically significant hotspots of anaemia were in  
18  
19  
20 30 the southern Terai region (4 districts in Province-1, 8 districts in Province-2, 1 district in  
21  
22 31 Bagmati province, and 3 districts in Province-5) of Nepal. At the individual level, women with  
23  
24 32 no education (aOR: 2.07 95% CI: 1.21-3.54), and from middle socio-economic class families  
25  
26 33 (aOR: 1.66, 95% CI: 1.02-2.68) were more likely to be anemic, whereas, older women ( $\geq 35$   
27  
28 34 years) (aOR: 0.48, 95% CI: 0.26-0.91), and those women who were using hormonal  
29  
30 35 contraceptives (aOR: 0.57, 95% CI: 0.39-0.84) were less likely to be anaemic. At the community  
31  
32 36 level, women from Province-2 (aOR: 3.12, 95% CI: 1.58-6.14) had higher odds of being  
33  
34 37 anaemic.  
35  
36  
37

38 38 **Conclusion:** WRA had higher odds of developing anemia and it varied by the geographical  
39  
40 39 regions. High prevalence of anaemia were observed in the southern Terai. The multi-pronged  
41  
42 40 approaches including nutritional, and non-nutritional anaemia prevention and control strategies  
43  
44 41 can benefit by tailoring the programs to the high risk provinces and districts with high burden of  
45  
46 42 anemia.  
47  
48  
49  
50  
51  
52  
53  
54  
55  
56  
57  
58  
59  
60

### Strengths and limitations of this study

- Used comprehensive, nationally representative data with haemoglobin level.
- The combined statistical methods including multilevel and spatial analysis were applied, which takes into account the role of geographical risk profile and determinants of anaemia among WRA in Nepal.
- Due to the cross-sectional design, it was difficult to determine the cause-and-effect relationships between the predictors and outcome variable (anaemia).
- Other potential confounding factors of anaemia such as nutrient intake, worm infestations, malaria and other non-modifiable risk factors were beyond the scope of this study.
- This study could not distinguish the types of anaemia such as nutritional, genetic and infectious.

43  
44  
45

## 46 INTRODUCTION

47 Anaemia remains a significant public health problem in developing countries despite advances in  
48 health science.[1] Approximately one-third of the population is affected by anaemia  
49 globally.[2,3] South Asian accounts for the largest burden of anaemia with estimated prevalence  
50 of 49% in 2016 among women of reproductive age (WRA).[4] The highest prevalence over the  
51 past 26 years was 55.2% in 1990.[4] Despite the implementation of a ‘1000 days nutrition  
52 program’ among various other programs, targeted to a mother with newborn babies in South  
53 Asia, the reduction in anemia among pregnant women has not been significant.[5] To accelerate  
54 reduction of anaemia, the World Health Assembly has set a target of achieving a 50% reduction  
55 of anaemia among WRA by 2025 relative to 2010.[6] However, not a single South Asian country  
56 is on the way to achieve the 2025 targets.[7] Despite the historic efforts in preventing anaemia  
57 through the implementation of national nutrition programs and policies including iron-folic acid  
58 supplementation across the country, the prevalence of anaemia among WRA has been steadily  
59 increasing from 35% in 2011 to 41% in 2016.[8,9] These figures suggest that anaemia continues  
60 to be a severe public health problem in Nepal where the prevalence rate is  $\geq 40\%$ .[10]

61 Anaemia in WRA is associated with multiple conditions and consequences such as preterm  
62 delivery,[11] miscarriage,[12] low birth weight,[13] child growth faltering, impairment of  
63 cognitive function, increased susceptibility to infection, and poverty.[14,15] It is also associated  
64 with increased risk of prenatal and maternal mortality.[13,16] Approximately 20% of maternal  
65 deaths are caused by anaemia and it is also considered as an additional risk factor for 50% of all  
66 maternal deaths.[17,18]

67 Contributing factors and distribution of anaemia include a complex interplay of political,  
68 ecological, social, and biological factors.[19] In Nepal, anaemia among WRA is associated with

1  
2  
3 69 various socio-ecological factors. In the southern Terai of Nepal, low community education  
4  
5 70 status, gender based-inequality, poor health seeking behavior,[20–22] inadequate dietary intake  
6  
7 71 during pregnancy,[23–25] lack of diversified diet,[9,24,26] high burden of hookworm infection  
8  
9 72 and malaria,[27–29] and high amount of arsenic in potable water[30] were identified as factors  
10  
11 73 contributing to anaemia. On the other hand, high prevalence of anaemia in the mountainous  
12  
13 74 region were attributed to among others, food insecurity, and low dietary diversity,[9,24,31] poor  
14  
15 75 health services,[22] illiteracy, and gender based-inequality.[20,21]  
16  
17  
18  
19  
20 76 To the best of our knowledge, this is the first study to explore the geographical regions with  
21  
22 77 hotspots (high prevalence rate) and factors affecting anaemia among WRA using cluster  
23  
24 78 sampling of the nationally representative data of Nepal. Exploring spatial patterns and factors  
25  
26 79 affecting anaemia by geographical region is crucial to inform the planning for targeted anaemia  
27  
28 80 control and prevention programs.[32] The main objective of this study was to explore the spatial  
29  
30 81 distribution and contributing factors of anaemia among WRA in Nepal.  
31  
32  
33  
34

## 35 82 **METHODS**

### 36 83 **Patient and public involvement**

37 84 This study utilized a publicly available data set (NDHS); therefore, there was no patient  
38  
39 85 involved.  
40  
41  
42  
43

### 44 86 **Data source**

45 87 This study was based on the data from Nepal Demographic and Health Survey (NDHS) 2016, a  
46  
47 88 nationally representative cross-sectional survey. This survey was carried out as part of the DHS  
48  
49 89 program by New ERA under the guidance of the Ministry of Health, Government of Nepal and  
50  
51 90 was supported by ICF international and United States Agency for International Development  
52  
53  
54  
55  
56  
57  
58  
59  
60



91 (USAID). The study population for this study was WRA from the Nepal Demographic and  
92 Health Survey 2016.

### 93 **Sampling strategy**

94 The NDHS 2016 utilized a stratified, two-stage cluster sampling design to provide representative  
95 estimates for seven provinces, three ecological zones, and urban and rural areas. The survey used  
96 enumeration areas (EAs) which is a primary sampling unit (PSU) and was selected from 383  
97 wards in both rural (n=199) and urban (n=184) areas with probability proportional to size  
98 method. In the second stage, 30 households on average within EAs were selected using a  
99 systematic sampling technique. A more detailed methodology of the NDHS has been published  
100 elsewhere.[9] All WRA (pregnant and non-pregnant) with available data on anaemia, complete  
101 socio-demographic and nutritional characteristics who were resident or who had slept in the  
102 selected households on the night before the survey were eligible for the survey. The details of the  
103 sample size and exclusion criteria for the selection of the samples are presented in Figure 1.

### 104 **Study variables**

#### 105 **Outcome variables**

106 Haemoglobin level was measured using capillary blood by a battery-operated portable HemoCue  
107 rapid testing machine and was adjusted for altitude and smoking status.[9] According to the  
108 WHO, for non-pregnant and pregnant women aged 15-49 years, any form of anaemia is defined  
109 as haemoglobin concentration <12.0g/dL and 11g/dL respectively.[33] The categories of  
110 anaemia were further dichotomized into 'anaemic' and 'not anaemic'.

#### 111 **Predictor's variables**

112 Predictors of anaemia were selected based on the literature review.[14,34–36] The wide range of  
113 socio-demographic, individual, household and community factors were hypothesized to increase

1  
2  
3 114 the likelihood of anaemia. The predictors of anaemia including both individual-level and  
4  
5 115 community-level factors were included in the analysis. The coding strategy of individual-level  
6  
7  
8 116 and community-level factors are presented in online supplementary Table 1.  
9

### 10 11 117 **Individual-level factors**

12 118 A total of 11 individual-level factors were identified, and that included for example, respondent's  
13  
14 119 age, education level, occupation, wealth index, nutritional status, pregnancy status, and minimum  
15  
16 120 dietary diversity for WRA (MDD-W). The minimum Dietary Diversity for Women of  
17  
18 121 Reproductive age (MDD-W) was calculated using the guideline of the modified FANTA III tool  
19  
20 122 developed by the Food and Agriculture Organization (FAO) of the United Nations.[37]  
21  
22  
23

### 24 123 **Community-level factors**

25 124 The six different factors were included in the community-level factors that included place of  
26  
27 125 residence, province, community wealth, community female education, community safe water  
28  
29 126 access, and community toilet facility. The selection of community-level factors were based on  
30  
31 127 the group of women living in similar settings.[32] If more women have shared features such as  
32  
33 128 place of residence, province, type of water source, and toilet facility; it was considered to have  
34  
35 129 the same effect on anaemia among WRA.[32] For community level wealth and female education,  
36  
37 130 we constructed the aggregate continuous community-level predictor-variables by aggregating  
38  
39 131 individual-level characteristics at the community (cluster) level. We dichotomized the aggregate  
40  
41 132 variables into "high" or "low" based on the distribution of the proportion values calculated for  
42  
43 133 each community.[38] The mean value was used as a cut-off point of the proportion values for the  
44  
45 134 categorization of community-level variables. The community wealth was categorized as 'high' if  
46  
47 135 the proportion of women from richest (rich, richest) households in the community was above  
48  
49 136 21% and 'low' if the proportion was 0 to 21%. Community female education was defined as the  
50  
51  
52  
53  
54  
55  
56  
57  
58  
59  
60

1  
2  
3 137 mean percentage of women in the community with at least primary education and above.[39]  
4

5 138 Water supply and sanitation guidelines based on the WHO and UNICEF Joint Monitoring  
6

7  
8 139 Programme (JMP) were used to define improved toilet facility and improved water source.[40]  
9

## 10 11 140 **Data analysis**

### 12 13 141 **Statistical analysis**

14  
15 142 Data were analyzed using Stata/MP version 14.1 (StataCorp LP, College Station, Texas). Data  
16  
17 143 were adjusted for enumeration areas (EAs) and disproportionate sampling and non-response.

18  
19 144 Weighted frequencies, weighted percentage, mean and SD were used for the descriptive analysis.

20  
21 145 The multilevel mixed-effect logistic regression analysis was performed to estimate the adjusted  
22  
23 146 odds ratio and to estimate the extent of random variations between communities.

24  
25  
26  
27 147 Four models were created and were fitted. Model 1 (empty model) was fitted without predictor  
28  
29 148 variable to test random variability in the intercept and to estimate the intra-class correlation

30  
31 149 (ICC).[41] Model 2 examined the effects of individual-level characteristics, model 3 examined

32  
33 150 the effects of community-level variables, and model 4 examined the effects of both individual

34  
35 151 and community-level characteristics simultaneously. In the multilevel mixed-effect logistic

36  
37 152 regression models, the fixed effects estimated the association between the likelihood of anaemia

38  
39 153 among WRA and the individual-level and community-level factors, and the findings are reported

40  
41 154 in terms of adjusted odds ratio (aOR) with p-values <0.05 and 95% confidence intervals (CIs).

42  
43 155 To prevent statistical bias in the multilevel logistic regression model, we examined and reported

44  
45 156 multicollinearity among the predictor variables using variation inflation factors (VIF). In this

46  
47 157 study, we used "10" as a cut-off value for the maximum level of VIF.[42] The random effects are

48  
49 158 expressed as ICC,[41] and proportional change in variance (PCV).[43] The ICC was calculated

50  
51 159 to evaluate the cluster variability; and PCV can measure the total variation due to factors at the

1  
2  
3 160 individual- and community- levels.[41] Models fit were assessed using Akaike information  
4  
5 161 criterion (AIC) and the Bayesian information criterion (BIC). Considering the nested structure of  
6  
7 162 the survey data, a multilevel model is considered to be appropriate than ordinary single-level  
8  
9 163 regression model because it provides correct parameter estimates by handling the cluster  
10  
11 164 data.[44,45]  
12  
13  
14

### 15 165 **Spatial analysis**

16 166 Spatial analysis were performed using ArcGIS software V.10.8, and base files of the  
17  
18 167 administrative provinces and districts of Nepal were obtained from Government of Nepal,  
19  
20 168 Ministry of Land Management, [46] and Natural Earth.[47] The global positioning system (GPS)  
21  
22 169 data set for NDHS was obtained from the DHS website after receiving the approval letter. The  
23  
24 170 prevalence of anaemia and standardized prevalence ratio were computed for both the districts  
25  
26 171 and provinces in Stata/MP version 14.1 software and were later transferred to Excel spreadsheet.  
27  
28 172 These data were imported into the ArcGIS software to link the reported anaemia prevalence for  
29  
30 173 each cluster to the corresponding geographical location (survey cluster data). The spatial  
31  
32 174 variations of the prevalence of anaemia among WRA by both districts and provinces were  
33  
34 175 visualized. Similarly, the standardized prevalence ratio of anaemia among WRA (normalized to  
35  
36 176 the national prevalence of 41%) for both districts and provinces were visualized.  
37  
38  
39  
40  
41  
42

43 177 The spatial analysis was performed to explore the clustering of anaemia among WRA using the  
44  
45 178 Getis-Ord G-statistic tool in ArcGIS software. The Getis-Ord G-statistics identifies statistically  
46  
47 179 significant spatial clusters of high values (hot spots) and low values (cold spots).[48] The  
48  
49 180 statistical significance of autocorrelation was determined by z-scores and p-value  $\leq 0.05$  with a  
50  
51 181 95% Confidence Intervals (CIs).[32,48] An autocorrelation can be categorized into positive and  
52  
53 182 negative using Getis-Ord G-statistics. For statistically significant positive autocorrelation, larger  
54  
55  
56  
57  
58  
59  
60

1  
2  
3 183 z-score, meant more intense clustering of high values (hot spots) and for statistically significant  
4  
5 184 negative autocorrelation, smaller z-score meant more intense clustering of low values (cold spot)  
6  
7  
8 185 which allowed us to identify the spatial variability of anaemia among WRA.[9] An anaemia hot  
9  
10 186 spot was defined as the occurrence of high prevalence rates of anaemia clustered together on the  
11  
12 187 map. Anaemia cold spot was referred to the occurrence of low prevalence rates of anaemia  
13  
14  
15 188 clustered together on the map.[32,48] The spatial pattern and distribution of anaemia prevalence  
16  
17 189 rates among WRA in Nepal are visualized on the map (Figure 2)

### 190 **Ethical consideration**

21  
22 191 The DHS survey protocols were approved by the institutional review boards of ICF, the DHS  
23  
24 192 program, and the Nepal Health Research Council (NHRC). The details on ethical procedures  
25  
26  
27 193 used in this survey have been published elsewhere.[9] We registered and requested for access to  
28  
29 194 both main data and GPS data from the DHS website[49] and received an approval to access and  
30  
31 195 download the DHS data file. DHS program collected data following a written informed consent  
32  
33 196 from each individual. All individual identifiers were precluded from the final dataset in this  
34  
35  
36 197 study.

## 39 **RESULTS**

### 41 **Socio-demographic characteristics of study participants**

42  
43 200 In this study, a total of 6,414 WRA were included in the analysis (Table 1). The mean ( $\pm$ SD) age  
44  
45  
46 201 of the study participants was 29 ( $\pm$ 9.7) years. More than one third (38.1%) of the participants  
47  
48 202 from age group 15-24 years, and women (35.5%) had attended secondary level of education.  
49  
50 203 Nearly one quarter (22.4%) of study participants were from richer wealth quintiles and more than  
51  
52 204 half (59.7%) of the women were not using any contraceptive methods, and a half (50.6%) of the  
53  
54  
55 205 participants consumed more than five food types. High proportion of women (68.8%) belonged

1  
2  
3 206 to urban areas, and were from Bagmati province (21.9%). More than half (54.2%) of the women  
4  
5 207 had the highest percentage of community female education, whilst, nearly two-thirds (64%) of  
6  
7 208 the women belonged to a low percentage of community female wealth index. Majority of the  
8  
9  
10 209 participants had improved sources of drinking water (91%) and type of toilet facility (84.1%).  
11  
12 210 (Table 1)

### 211 **Prevalence of anaemia among women of reproductive age**

212 In the current study, the overall prevalence of any anaemia across Nepal was 41% (95% CI:  
213 38.5-42.9%). At the individual level, the prevalence of anaemia was higher among younger age  
214 groups (43.5%), and women who attended at least secondary level education (42.6%). The  
215 higher cases of anaemia were found in middle socio-economic class families (48.9%). The  
216 prevalence of anaemia was more in who used various contraceptive methods (43.1%), and those  
217 who consumed less than five food groups (51%). At the community-level, the prevalence of  
218 anaemia was higher in women who came from Province-2 (57.7%). The high proportion of  
219 anaemia was found in community with low female education (47.8%), female wealth index  
220 (44.3%), and who did not have improved toilet facility (51.4%) (Table 1).

### 222 **Factors affecting anemia among women of reproductive age**

223 The fixed effects (a measure of association) and the random-effects for the risk of developing  
224 anaemia among WRA are presented in Table 2. The results of the empty model (model 1)  
225 showed that there was statistically significant variability in the odds of anaemia between  
226 communities ( $\tau=0.627$ ,  $p<0.001$ ). The ICC in the empty model implied that 16% of the total  
227 variance for the risk of developing anaemia was attributed to differences between the  
228 communities. In individual-level factors (model 2), women who did not have formal education  
229 (aOR=2.23, 95% CI: 1.35-3.67) compared to those with higher education, and who belonged to

1  
2  
3 230 middle-class families (aOR=1.81, 95% CI: 1.17-2.75) compared to the family from poorest  
4  
5 231 families were found to have higher odds of anemia. Older women had 54% lower (aOR=0.46,  
6  
7 232 95% CI: 0.24-0.88) odds of developing anaemia compared to younger women. Women who used  
8  
9 233 hormonal contraceptive methods had 39% lower (aOR=0.61, 95% CI: 0.42-0.86) odds of  
10  
11 234 anaemia compared to who did not use contraceptive methods. The ICC in model 2 indicated that  
12  
13 235 13.9% of the variation in WRA anaemia was attributable to differences across communities. The  
14  
15 236 PCV indicated that 15.3% of the variance in WRA anaemia across communities was explained  
16  
17 237 by the individual-level characteristics.

18  
19  
20  
21  
22 238 The community-level (model 3) showed that women from Province-2 had 2.5 times higher  
23  
24 239 (aOR=2.51, 95% CI: 1.79-3.53) odds of anaemia compared to women from Bagmati province.  
25  
26 240 Women who belonged to communities with a high percentage of the wealthy households had  
27  
28 241 1.48 times higher (aOR=1.48, 95% CI: 1.21-1.80) odds of anaemia compared to those coming  
29  
30 242 from low percentage of the wealthy household; and women residing in communities with a high  
31  
32 243 percentage of community female education had 1.39 times higher (aOR=1.39, 95% CI: 1.15-  
33  
34 244 1.68) odds of anaemia compared to those coming from the communities with a low percentage of  
35  
36 245 education. The ICC in model 3 showed that differences between communities accounted for  
37  
38 246 about 11.1% of the variation in anaemia among WRA. In addition, the PCV indicated that 33.9%  
39  
40 247 of the variation in WRA anaemia between communities was explained by community-level  
41  
42 248 characteristics.

43  
44  
45  
46  
47  
48  
49 249 In model 4, women who had no formal education were found to have 2 times higher (aOR=2.07,  
50  
51 250 95% CI: 1.21-3.54) odds of anaemia compared to women who had higher education. Women  
52  
53 251 from middle socio-economic family had higher (aOR=1.66, 95% CI: 1.02-2.68) odds of anaemia  
54  
55 252 compared to poorest counterparts. Women who came from Province-2 (aOR=3.12, 95% CI:

1  
2  
3 253 1.1.58-6.14) had higher odds of anaemia compared to Bagmati province. The older women had  
4  
5 254 52% lower (aOR=0.48, 95% CI: 0.26-0.91) odds of anaemia compared to younger women, and  
6  
7  
8 255 women who used hormonal contraceptive methods had 43% lower (aOR=0.57, 95% CI: 0.39-  
9  
10 256 0.84) odds of anaemia compared to who did not use contraceptive methods. After the inclusion  
11  
12 257 of both the individual and community-level variables in model 4, the ICC indicated that 10% of  
13  
14  
15 258 the variability in anaemia among WRA was attributable to the difference between communities.  
16  
17 259 Furthermore, the PCV indicated that 39.5% of the variation in anaemia among WRA between  
18  
19 260 communities was explained by both individual and community-level characteristics (Table 2).  
20  
21

### 22 261 **Spatial data analysis**

23  
24 262 Figure 3(a) shows the prevalence of anaemia among WRA across provinces in Nepal. A severe  
25  
26 263 anaemia prevalence ( $\geq 40\%$ ) among WRA was seen in Province-2, followed by Province-1 and 5.  
27  
28  
29 264 The prevalence of moderate anaemia (20-39.9%) was observed in Bagmati, Gandaki, Karnali,  
30  
31 265 and Sudurpaschim province. Mild anaemia (prevalence $<19.9\%$ ) was not found in any provinces.  
32  
33 266 Figure 3(b) shows the prevalence of anaemia among WRA across 75 districts in Nepal. The  
34  
35 267 prevalence rate of severe anaemia was observed in 29 out of 75 districts, and mild anaemia was  
36  
37  
38 268 found in only eight districts (Figure 3).  
39  
40

41 269 The standardized prevalence ratio by provinces (standardized to the national mean prevalence of  
42  
43 270 41%) are shown in Figure 4 (a), and ranged from 0.68 to 1.4. The higher prevalence ratio of  
44  
45 271 anaemia was found in Province-2, whereas a lower prevalence ratio was observed in Bagmati,  
46  
47  
48 272 Gandaki, and Karnali province. Figure 4 (b) shows the standardized prevalence ratio across the  
49  
50 273 75 districts, and ranged from 0.76 to 1.59. The higher standardized prevalence ratio of anaemia  
51  
52 274 was observed in 17 out of 75 districts across the country (Figure 4).  
53  
54  
55  
56  
57  
58  
59  
60



1  
2  
3 275 The spatial pattern and distribution of anaemia among WRA at the cluster level are displayed in  
4  
5 276 Figure 5. The spatial analysis at the cluster level showed that statistically significant high  
6  
7  
8 277 hotspots of anaemia were observed in the southern Terai of the country bordering India:  
9  
10 278 Province-2 (8 districts), Province-1 (4 districts), southern plain of the Bagmati province (1  
11  
12 279 district), and southwestern region of Province-5 (3 districts). Whilst, cold spots of anaemia were  
13  
14  
15 280 observed in most of the hilly regions of the country (Figure 5).  
16  
17

## 18 281 **DISCUSSION**

### 19 282 **Overall findings**

20 283 In this study, more than 40% of WRA were anaemic which implies that anaemia is still a serious  
21  
22 284 public health problem in Nepal.[33] Geographical pattern showed that anaemia is a serious  
23  
24 285 public health problem in three of the seven provinces and 29 out of the 75 districts in Nepal. The  
25  
26 286 higher prevalence of anaemia was observed in the southern Terai bordering India particularly in  
27  
28 287 Province-2, and the upper Himalayan region of the country. The spatial analysis at the cluster  
29  
30  
31 288 level showed that high hot spots of anaemia were observed in Terai region especially in  
32  
33 289 Province-1, 2 and 5. A possible reason could be that WRA from Terai region and high  
34  
35 290 mountainous regions are more likely to be of a lower socioeconomic status and thus can afford  
36  
37 291 less diversified diet compared to other provinces and districts.[9,26]  
38  
39 292 In the southern Terai of Nepal, despite ecological richness, people have long suffered from a  
40  
41 293 deficiency of micronutrients such as Vitamin A, iron and zinc,[23] and a high burden of  
42  
43 294 hookworm infestation and a high prevalence of malaria which are established to contribute to  
44  
45 295 anemia.[27] Diet of women in the Terai lack diversity and, nutrient adequacy which pose an  
46  
47 296 increased risk of anaemia.[24] Furthermore, the Terai region of Nepal is considered to be high  
48  
49 297 malaria-endemic region,[28,29,50] and higher risk of malaria is associated with a higher risk of  
50  
51  
52  
53  
54  
55  
56  
57  
58  
59  
60

1  
2  
3 298 anaemia.[27] The majority (90%) of the population from Terai region rely on groundwater  
4  
5 299 especially shallow tube well for domestic purposes including drinking.[30] Higher arsenic  
6  
7 300 concentration can inhibit haem iron metabolism and increase erythrocyte hemolysis.[51]  
8  
9 301 Consequently, drinking arsenic-containing water poses an increased risk of anaemia among  
10  
11 302 women.[52] Arsenic exposure was more likely to cause anemia among women in  
12  
13 303 Bangladesh.[53]  
14  
15 304 The spatial analysis at the cluster level found that high hotspots of anaemia were also observed in  
16  
17 305 southwestern region (Province-5), particularly Banke, Bardiya and Kanchanpur district. A  
18  
19 306 previous study highlighted that Glucose 6 phosphate dehydrogenase deficiency (G6PDd), sickle  
20  
21 307 cell trait (SCT), and sickle cell anaemia (SCA) as the most common disorder in Tharu  
22  
23 308 community living in southwestern Province-5.[54,55] G6PDd and haemoglobinopathies are  
24  
25 309 established to cause anaemia among WRA.[36]  
26  
27 310 The geographical variance of high cases of anaemia across the high mountainous region could be  
28  
29 311 attributed to food insecurity, low dietary diversity, [9,24,31] less calorie diet,[24] poor health  
30  
31 312 service coverage,[22] high illiteracy, gender based-inequality, and poor health seeking  
32  
33 313 behaviour.[20,21]  
34  
35  
36  
37  
38  
39

#### 40 **Socio-demographic characteristic among women and anaemia**

41  
42 315 Women who had no formal education, and those who came from middle socio-economic  
43  
44 316 households, and from younger age group were at increased risk of anaemia. These findings  
45  
46 317 corroborate with previous studies from low and middle-income countries (LMICs) including  
47  
48 318 Ethiopia,[32] India,[56] Tanzania,[57] Rwanda,[58] Timor-Leste,[59] and Bangladesh.[60]  
49  
50 319 Studies from Ethiopia and Tanzania suggest that higher-level education might enable women to  
51  
52 320 gain knowledge and improve attitude which in turn can promote them to adopt healthier lifestyle  
53  
54  
55  
56  
57  
58  
59  
60

1  
2  
3 321 including good nutrition habits, better health-seeking behavior, and good hygiene practices that  
4  
5 322 can prevent anaemia.[32,57]  
6  
7  
8 323 Anaemia is a multifaceted problem where nutrition and household economic status are  
9  
10 324 considered to have a synergistic association.[58] Women belonging to poorer households are  
11  
12 325 more likely to be anaemic compared to those living in middle or richer households in most of the  
13  
14 326 countries.[14,32,58] Contrastingly, this study revealed that poorer Nepalese women were less  
15  
16 327 likely to be anaemic. In this study, prevalence of anaemia was 32.3% in poorest, 41.5% in  
17  
18 328 poorer, 48.9% in middle, 43.4% in richer, and 35.9% in richest households. These results are in  
19  
20 329 agreement with a previous study that used the data from the 2016 Nepal National Micronutrient  
21  
22 330 Status Survey (NNMSS).[36] The possible reason could be Nepal is an agrarian-based country  
23  
24 331 and the staple diet may be similar for most of the households.[61] Most of the Nepalese people  
25  
26 332 consume iron-rich staple foods including cereal, grains, lentils and animal source food regardless  
27  
28 333 of wealth status.[61] Future research are critical to explore the association of household  
29  
30 334 economic status and anaemia among WRA in Nepal.

31  
32  
33  
34  
35  
36 335 In this study, the prevalence of anaemia was found to decrease with increasing age. These  
37  
38 336 findings are consistent with studies from Ethiopia,[32] Demographic Republic of Congo,[62] and  
39  
40 337 Benin.[52] The possible reason could be that the low fertility rates are high among older  
41  
42 338 women.[32] Relatively higher prevalence of anaemia in a younger age could be because of lower  
43  
44 339 dietary iron intake and the additional demand for iron to compensate iron loss during  
45  
46 340 menstruation, pregnancy, and lactation.[1] High prevalence of anaemia among younger women  
47  
48 341 could also be attributed to teenage pregnancy.[35]  
49  
50  
51  
52

### 53 342 **Effect of contraceptive use on anaemia**

54  
55  
56  
57  
58  
59  
60

1  
2  
3 343 In this study, the use of hormonal contraceptive methods was less likely to be associated with  
4  
5 344 anaemia among WRA which is consistent with previous studies conducted in Nepal,[35]  
6  
7 345 Rwanda,[58] Tanzania,[57] and Ethiopia.[63] This could be due to multiple reasons. For  
8  
9 346 instance, the plausible primary mechanism could be the use of hormonal contraceptive lead to  
10  
11 347 less blood loss during the menstruation.[64,65] Almost 100-150 mg of iron is lost during  
12  
13 348 menstrual bleeding.[66] Subsequently, this may directly or indirectly furnish iron loss among  
14  
15 349 women at high risk for iron-deficiency anaemia.[65,66] A previous study also suggested that  
16  
17 350 Depo-Provera injections were more likely to increase haemoglobin concentration among WRA  
18  
19 351 in Nepal.[67]  
20  
21  
22  
23

## 24 352 **Community-level factors and anaemia**

25  
26 353 In this study, estimated intra-class correlation (ICC) shows that about 10.3% of the community  
27  
28 354 level variability was attributable to the difference between communities among WRA. The PCV  
29  
30 355 indicated that 39.5% of the variation in WRA anaemia between communities was explained by  
31  
32 356 both individual and community-level characteristics. This finding is in line with the study  
33  
34 357 conducted in Ethiopia, where both individual- and community-level factors accounted for about  
35  
36 358 43% of the variability of anaemia among WRA.[32] Women who came from Province-2 had  
37  
38 359 more than three times higher odds of anaemia compared to Bagmati province. A possible reason  
39  
40 360 could be due to the fact that WRA from Province-2 are more likely to be of a lower  
41  
42 361 socioeconomic status and are less likely to afford a diverse diet.[9,26] In addition, compliance  
43  
44 362 rate of recommended dose of iron tablets amongst the pregnant mothers in Province-2 was also  
45  
46 363 low (28%) compared to other provinces.[9] This study showed that promoting community  
47  
48 364 female education has a potential role in lowering the likelihood of anaemia which echoes with a  
49  
50 365 study from Malawi.[38] This could be explained by the fact that higher community education  
51  
52  
53  
54  
55  
56  
57  
58  
59  
60

1  
2  
3 366 provides a context where women are enabled to gain nutritional knowledge and material  
4  
5 367 resources[25] that can increase consumption of iron absorption enhancers such as vitamin C,  
6  
7 368 phytates (whole grains, legumes), and calcium (dairy products). With increase knowledge,  
8  
9 369 women may also reduce the intake of tea, coffee, and some spices which are known to inhibit the  
10  
11 iron absorption.[68]  
12  
13

### 14 15 371 **Strength and limitation**

16 372 This is the first study to explore the spatial pattern and multilevel analysis of anaemia among  
17  
18 373 WRA in Nepal using stringent cluster sampling of a comprehensive nationally representative  
19  
20 374 data. The combined statistical methods including multilevel and spatial analysis used in this  
21  
22 375 study provides important insights on the role of contextual factors and geographical patterns in  
23  
24 376 the occurrences of anaemia among WRA in Nepal. This study has some limitations. The cross-  
25  
26 377 sectional design of the study does not allow us to establish the causality. This study relied on  
27  
28 378 haemoglobin as the measure of anaemia; further studies should consider other indices that  
29  
30 379 include total ferritin and total iron binding capacity to differentiate the types of anemia. Since  
31  
32 380 this study is based on the secondary data analysis, we are unable to incorporate potential  
33  
34 381 confounding factors of anaemia such as nutrient intake, worm infestations, malaria and other  
35  
36 382 non-modifiable risk factors.  
37  
38  
39  
40  
41  
42

### 43 383 **CONCLUSION**

44  
45 384 This study highlighted a high prevalence of anaemia among WRA across Nepal. At an individual  
46  
47 385 level, women who had no formal education, those who came from middle socio-economic class  
48  
49 386 families were more likely to be anaemic, whereas, older women, and those who used hormonal  
50  
51 387 contraceptive were less likely to be anaemic. At the community level, low community female  
52  
53 388 education, and women living in Province-2 were associated with increased odds of anaemia. In  
54  
55  
56  
57  
58  
59  
60

1  
2  
3 389 the spatial analysis, our study found statistically significant hot spots in the southern Terai region  
4  
5 390 particularly in Province-1 (4 districts), Province-2 (8 districts), Bagmati province (1 district), and  
6  
7 391 Province-5 (3 districts). Multi-pronged approaches including nutritional, and non-nutritional  
8  
9 392 anaemia prevention and control strategies can benefit by tailoring the programs to the high risk  
10  
11 393 provinces and districts with high burden of anemia.  
12  
13  
14

## 15 394 **Acknowledgements**

16  
17 395 We thank Measure DHS, ICF Macro for granting free access to the data used in this analysis. We  
18  
19 396 are grateful to Professor Dr. Kalpana Tiwari, Director of Research and Planning Purbanchal  
20  
21 397 University, Faculty of Science and Technology, College of Applied Food and Dairy Technology,  
22  
23 398 Kathmandu Nepal for assistance of undertaking this research.  
24  
25  
26

## 27 399 **Contributors**

28  
29 400 DR Su designed, conceptualized the study, data extraction and analysis, interpreted the results,  
30  
31 401 generate the map, writing an original draft, reviewing, editing, and overall supervision of the  
32  
33 402 research. SS generate the map, and writing an original draft. DR Si, BA, and PMSP writing an  
34  
35 403 original draft, reviewing and editing, overall supervision of the research. All authors read and  
36  
37 404 approved the final manuscript.  
38  
39  
40  
41

## 42 405 **Funding**

43  
44 406 This research received no specific grant from any funding agency in the public, commercial or  
45  
46 407 not-for-profit sectors.  
47  
48  
49

## 50 408 **Competing interests**

51  
52 409 None declared  
53  
54

## 55 410 **Patient consent for publication**

1  
2  
3 411 Not required  
4  
5

6  
7 412 **Ethical approval**

8 413 The NDHS 2016 was approved by the Nepal Health Research Council (NHRC) and ICF Macro.  
9  
10

11  
12 414 **Data sharing statement**

13  
14 415 Dataset used in this study is publicly available from the DHS website (URL:

15  
16 416 <https://www.dhsprogram.com/data/available-datasets.cfm>).  
17  
18  
19 417

20  
21  
22 418 **REFERENCES**

- 23  
24 419 1 Benoist BD, McLean E, Egli I, Cogswell M, Editors. Worldwide prevalence of anaemia  
25  
26 420 1993–2005.  
27  
28 421 2008.[http://apps.who.int/iris/bitstream/handle/10665/43894/9789241596657\\_eng.pdf?seq](http://apps.who.int/iris/bitstream/handle/10665/43894/9789241596657_eng.pdf?sequence=1)  
29  
30 422 uence=1 (accessed 27 Mar 2018).  
31  
32  
33 423 2 Stevens GA, Finucane MM, De-Regil LM, *et al.* Global, regional, and national trends in  
34  
35 424 haemoglobin concentration and prevalence of total and severe anaemia in children and  
36  
37 425 pregnant and non-pregnant women for 1995-2011: A systematic analysis of population-  
38  
39 426 representative data. *Lancet Glob Heal* 2013;**1**:16–25. doi:10.1016/S2214-109X(13)70001-  
40  
41 427 9  
42  
43  
44 428 3 Kassebaum NJ, Jasrasaria R, Naghavi M, *et al.* A systematic analysis of global anemia  
45  
46 429 burden from 1990 to 2010. *Blood* 2014;**123**:615–24. doi:10.1182/blood-2013-06-508325  
47  
48  
49 430 4 World Health Organization (WHO). Global Health Observatory Data Repository/World  
50  
51 431 Health Statistics. 2016.<http://apps.who.int/gho/data/node.main.11lang=en>  
52  
53  
54  
55  
56  
57  
58  
59  
60

- 1  
2  
3 432 5 Akseer N, Kamali M, Arifeen SE, *et al*. Progress in maternal and child health: How has  
4  
5  
6 433 South Asia fared? *BMJ* 2017;**357**. doi:10.1136/bmj.j1608  
7  
8  
9 434 6 WHO. Global nutrition targets 2025: anaemia policy brief (WHO/NMH/NHD/14.4).  
10  
11 435 2014;:1–  
12  
13 436 7.[http://www.who.int//iris/bitstream/10665/148556/1/WHO\\_NMH\\_NHD\\_14.4\\_eng.pdf](http://www.who.int//iris/bitstream/10665/148556/1/WHO_NMH_NHD_14.4_eng.pdf)  
14  
15  
16 437 7 Harding KL, Aguayo VM, Webb P. Hidden hunger in South Asia: A review of recent  
17  
18 438 trends and persistent challenges. *Public Health Nutr* 2018;**21**:785–95.  
19  
20  
21 439 doi:10.1017/S1368980017003202  
22  
23  
24 440 8 Ministry of Health and Population, New ERA, The DHS Program ICF. Nepal  
25  
26 441 Demographic and Health Survey 2011. 2011;:163–71. doi:10.1007/978-94-6091-391-  
27  
28 442 4\_15  
29  
30  
31 443 9 Ministry of Health, New ERA, The DHS Program ICF (2017). Nepal Demographic and  
32  
33 444 Health Survey. 2016.<https://www.dhsprogram.com/pubs/pdf/FR336/FR336.pdf> (accessed  
34  
35 445 11 Jul 2019).  
36  
37  
38  
39 446 10 World Health Organization. Department of Nutrition for Health and Development. Iron  
40  
41 447 deficiency anaemia: assessment, prevention and control: a guide for programme managers.  
42  
43 448 Geneva: World Health Organization. 2001;:1–114. doi:10.1136/pgmj.2009.089987  
44  
45  
46 449 11 Scholl TO, Hediger ML, Fischer RL, *et al*. Anemia vs iron deficiency: increased risk of  
47  
48 450 preterm delivery in a prospective study. *Am J Clin Nutr* 1992;**55** (5):985–8.  
49  
50  
51 451 doi:10.1093/ajcn/55.5.985  
52  
53  
54 452 12 Szerafin L, Jakó J. Anemia in Pregnancy: Characteristics in Szabolcs-Szatmár-Bereg  
55  
56  
57  
58  
59  
60



- 1  
2  
3 453 County, Hungary. *Orv Hetil* 2010;**151**:1347–52. doi:10.1556/OH.2010.28887  
4  
5  
6 454 13 Rasmussen KM. Is There a Causal Relationship between Iron Deficiency or Iron-  
7  
8 455 Deficiency Anemia and Weight at Birth, Length of Gestation and Perinatal Mortality? *J*  
9  
10 456 *Nutr* Published Online First: 2001. [https://academic.oup.com/jn/article-](https://academic.oup.com/jn/article-abstract/131/2/590S/4686836)  
11  
12 abstract/131/2/590S/4686836 (accessed 10 Jun 2020).  
13  
14  
15  
16 458 14 Balarajan Y, Ramakrishnan U, Özaltın E, *et al.* Anaemia in low-income and middle-  
17  
18 459 income countries. *Lancet* 2011;**378**:2123–35. doi:10.1016/S0140-6736(10)62304-5  
19  
20  
21 460 15 Rabbani G, Saw A, Sayem A, *et al.* Differentials in the prevalence of anemia among non-  
22  
23 461 pregnant , ever-married women in Bangladesh : multilevel logistic regression analysis of  
24  
25 462 data from the 2011 Bangladesh Demographic and Health Survey. *BMC Womens Health*  
26  
27 463 2015;**4**:4–11. doi:10.1186/s12905-015-0211-4  
28  
29  
30  
31 464 16 Baradwan S, Alyousef A, Turkistan A. Associations between iron deficiency anemia and  
32  
33 465 clinical features among pregnant women: A prospective cohort study. *J Blood Med*  
34  
35 466 2018;**9**:163–9. doi:10.2147/JBM.S175267  
36  
37  
38  
39 467 17 Sanghvi TG, Harvey PWJ, Wainwright E. Maternal iron-folic acid supplementation  
40  
41 468 programs: Evidence of impact and implementation. *Food Nutr Bull* 2010;**31**.  
42  
43 469 doi:10.1177/15648265100312s202  
44  
45  
46 470 18 Galloway R, Dusch E, Elder L, *et al.* Women’s perceptions of iron deficiency and anemia  
47  
48 471 prevention and control in eight developing countries. *Soc Sci Med* 2002;**55**:529–44.  
49  
50 472 doi:10.1016/S0277-9536(01)00185-X  
51  
52  
53  
54 473 19 McLean E, Cogswell M, Egli I, *et al.* Worldwide prevalence of anaemia, WHO Vitamin  
55  
56  
57  
58  
59  
60

- 1  
2  
3 474 and Mineral Nutrition Information System, 1993-2005. *Public Health Nutr* 2009;**12**:444–  
4  
5 475 54. doi:10.1017/S1368980008002401  
6  
7  
8 476 20 Nepal National Planning Commission. Nepal Human Development Report 2014: Beyond  
9  
10 477 geography. 2014. [https://www.npc.gov.np/images/category/NHDR\\_Report\\_20141.pdf](https://www.npc.gov.np/images/category/NHDR_Report_20141.pdf)  
11  
12  
13 478 21 Nepal Development Research Institute and UNFPA. Situational Assessment for Improved  
14  
15 479 Gender Based Violence Prevention and Response in Selected Districts of Nepal, Lalitpur,  
16  
17 480 Nepal; 2017.  
18  
19  
20  
21 481 22 Adhikari B, Mishra SR. Urgent need for reform in Nepal's medical education. *Lancet*  
22  
23 482 2016;**388**:2739–40. doi:10.1016/S0140-6736(16)32423-0  
24  
25  
26 483 23 Parajuli RP, Umezaki M, Watanabe C. Diet among people in the Terai region of Nepal, an  
27  
28 484 area of micronutrient deficiency. *J Biosoc Sci* 2012;**44**:401–15.  
29  
30 485 doi:10.1017/S0021932012000065  
31  
32  
33  
34 486 24 Campbell RK, Talegawkar SA, Christian P, *et al*. Seasonal dietary intakes and  
35  
36 487 socioeconomic status among women in the terai of Nepal. *J Heal Popul Nutr*  
37  
38 488 2014;**32**:198–216. doi:10.3329/jhpn.v32i2.2615  
39  
40  
41 489 25 Sunuwar DR, Sangroula RK, Shakya NS, *et al*. Effect of nutrition education on  
42  
43 490 hemoglobin level in pregnant women: A quasi-experimental study. *PLoS One* 2019;**14**.  
44  
45 491 doi:10.1371/journal.pone.0213982  
46  
47  
48  
49 492 26 Sunuwar DR, Singh DR, Pradhan PMS. Prevalence and factors associated with double and  
50  
51 493 triple burden of malnutrition among mothers and children in Nepal: evidence from 2016  
52  
53 494 Nepal demographic and health survey. *BMC Public Health* 2020;**20**:405.  
54  
55  
56  
57  
58  
59  
60

- 1  
2  
3 495 doi:10.1186/s12889-020-8356-y  
4  
5  
6 496 27 Dreyfuss ML, Stoltzfus RJ, Shrestha JB, *et al.* Hookworms, Malaria and Vitamin A  
7  
8 497 Deficiency Contribute to Anemia and Iron Deficiency among Pregnant Women in the  
9  
10 498 Plains of Nepal. *J Nutr* 2000;**130**:2527–36. doi:10.1093/jn/130.10.2527  
11  
12  
13 499 28 Rijal KR, Adhikari B, Ghimire P, *et al.* Epidemiology of Plasmodium vivax malaria  
14  
15 500 infection in Nepal. *Am J Trop Med Hyg* 2018;**99**:680–7. doi:10.4269/ajtmh.18-0373  
16  
17  
18 501 29 Rijal KR, Adhikari B, Adhikari N, *et al.* Micro-stratification of malaria risk in Nepal:  
19  
20 502 Implications for malaria control and elimination. *Trop Med Health* 2019;**47**:1–12.  
21  
22 503 doi:10.1186/s41182-019-0148-7  
23  
24  
25 504 30 Pokhrel D, Bhandari BS, Viraraghavan T. Arsenic contamination of groundwater in the  
26  
27 505 Terai region of Nepal: An overview of health concerns and treatment options. *Environ.*  
28  
29 506 *Int.* 2009;**35**:157–61. doi:10.1016/j.envint.2008.06.003  
30  
31  
32 507 31 Singh DR, Ghimire S, Upadhyay SR, *et al.* Food insecurity and dietary diversity among  
33  
34 508 lactating mothers in the urban municipality in the mountains of Nepal. *PLoS One*  
35  
36 509 2020;**15**:0–17. doi:10.1371/journal.pone.0227873  
37  
38  
39 510 32 Kibret KT, Chojenta C, D’Arcy E, *et al.* Spatial distribution and determinant factors of  
40  
41 511 anaemia among women of reproductive age in Ethiopia: A multilevel and spatial analysis.  
42  
43 512 *BMJ Open* 2019;**9**:1–14. doi:10.1136/bmjopen-2018-027276  
44  
45  
46 513 33 World Health Organization. Haemoglobin concentrations for the diagnosis of anaemia and  
47  
48 514 assessment of severity. Geneva: World Health Organization, 2011.  
49  
50  
51  
52  
53 515 <http://www.who.int/vmnis/indicators/haemoglobin.pdf> (accessed 27 Mar 2018).  
54  
55  
56  
57  
58  
59  
60

- 1  
2  
3 516 34 Harding KL, Aguayo VM, Namirembe G, *et al.* Determinants of anemia among women  
4  
5 517 and children in Nepal and Pakistan: An analysis of recent national survey data. *Matern*  
6  
7 518 *Child Nutr* 2018;**14**:1–13. doi:10.1111/mcn.12478  
8  
9  
10 519 35 Gautam S, Min H, Kim H, *et al.* Determining factors for the prevalence of anemia in  
11  
12 520 women of reproductive age in Nepal: Evidence from recent national survey data. *PLoS*  
13  
14 521 *One* 2019;**14**:e0218288. doi:10.1371/journal.pone.0218288  
15  
16  
17  
18 522 36 Ford ND, Bichha RP, Parajuli KR, *et al.* Factors associated with anaemia in a nationally  
19  
20 523 representative sample of nonpregnant women of reproductive age in Nepal. *Matern Child*  
21  
22 524 *Nutr* 2020;:1–11. doi:10.1111/mcn.12953  
23  
24  
25  
26 525 37 FAO F. Minimum dietary diversity for women: a guide for measurement. *Rome FAO*  
27  
28 526 2016.  
29  
30  
31 527 38 Ntenda PAM, Nkoka O, Bass P, *et al.* Maternal anemia is a potential risk factor for  
32  
33 528 anemia in children aged 6-59 months in Southern Africa: A multilevel analysis. *BMC*  
34  
35 529 *Public Health* 2018;**18**:1–13. doi:10.1186/s12889-018-5568-5  
36  
37  
38  
39 530 39 Ntenda PAM, Chuang KY, Tiruneh FN, *et al.* Multilevel analysis of the effects of  
40  
41 531 individual and community-level factors on childhood anemia, severe anemia, and  
42  
43 532 hemoglobin concentration in Malawi. *J Trop Pediatr* 2018;**64**:267–78.  
44  
45 533 doi:10.1093/tropej/fmx059  
46  
47  
48  
49 534 40 World Health Organization (WHO), United Nations Children's Fund (UNICEF). WHO  
50  
51 535 and UNICEF Joint Monitoring Programme (JMP) for water supply and sanitation: types of  
52  
53 536 drinking-water sources and sanitation. Geneva, Switzerland. Published Online First:  
54  
55 537 2015.<http://www.wssinfo.org/definitions-methods/%0Awatsan-categories/>

- 1  
2  
3 538 41 Merlo J, Chaix B, Ohlsson H, *et al.* A brief conceptual tutorial of multilevel analysis in  
4  
5 539 social epidemiology: Using measures of clustering in multilevel logistic regression to  
6  
7 540 investigate contextual phenomena. *J Epidemiol Community Health* 2006;**60**:290–7.  
8  
9 541 doi:10.1136/jech.2004.029454  
10  
11  
12  
13 542 42 Joseph F. Hair J, Black WC, Babin BJ, *et al.* Multivariate Data Analysis, 7th Edition |  
14  
15 543 Pearson. [https://www.pearson.com/us/higher-education/program/Hair-Multivariate-Data-](https://www.pearson.com/us/higher-education/program/Hair-Multivariate-Data-Analysis-7th-Edition/PGM263675.html)  
16  
17 544 [Analysis-7th-Edition/PGM263675.html](https://www.pearson.com/us/higher-education/program/Hair-Multivariate-Data-Analysis-7th-Edition/PGM263675.html) (accessed 3 Apr 2020).  
18  
19  
20  
21 545 43 Merlo J, Chaix B, Yang M, *et al.* A brief conceptual tutorial on multilevel analysis in  
22  
23 546 social epidemiology: Interpreting neighbourhood differences and the effect of  
24  
25 547 neighbourhood characteristics on individual health. *J Epidemiol Community Health*  
26  
27 548 2005;**59**:1022–8. doi:10.1136/jech.2004.028035  
28  
29  
30 549 44 Guo G, Zhao H. Multilevel Modeling for Binary Data. *Annu Rev Sociol* 2000;**26**:441–62.  
31  
32 550 doi:10.1146/annurev.soc.26.1.441  
33  
34  
35  
36 551 45 Diez Roux A V. A glossary for multilevel analysis. *J Epidemiol Community Health*  
37  
38 552 2002;**56**:588–94. doi:10.1136/jech.56.8.588  
39  
40  
41 553 46 Government of Nepal, Survey Department. Ministry of Land Management, Cooperatives and  
42  
43 554 Poverty Alleviation. 2020.<http://dos.gov.np/>  
44  
45  
46 555 47 North American Cartographic Information Society (NACIS) Collaborators. Natural Earth.  
47  
48 556 <http://www.naturalearthdata.com/> (accessed 17 Jun 2020).  
49  
50  
51 557 48 Ord JK, Getis A. Local Spatial Autocorrelation Statistics: Distributional Issues and an  
52  
53 558 Application. *Geogr Anal* 1995;**27**:286–306. doi:10.1111/j.1538-4632.1995.tb00912.x  
54  
55  
56  
57  
58  
59  
60

- 1  
2  
3 559 49 Demographic and Health Surveys. The DHS Program.  
4  
5 560 <https://www.dhsprogram.com/data/available-datasets.cfm> (accessed 20 Jun 2020).  
6  
7  
8 561 50 Gautam N, Kakchapati S, Shrestha S, *et al.* Patterns and trends of malaria in 25 risk  
9  
10 562 districts of nepal from 2001 to 2017. *Clin Exp Vaccine Res* 2019;**8**:77–85.  
11  
12 563 doi:10.7774/cevr.2019.8.1.77  
13  
14  
15  
16 564 51 Mahmud H, Föller M, Lang F. Arsenic-induced suicidal erythrocyte death. *Arch Toxicol*  
17  
18 565 2009;**83**:107–13. doi:10.1007/s00204-008-0338-2  
19  
20  
21 566 52 Hopenhayn C, Bush HM, Bingcang A, *et al.* Association between arsenic exposure from  
22  
23 567 drinking water and anemia during pregnancy. *J Occup Environ Med* 2006;**48**:635–43.  
24  
25 568 doi:10.1097/01.jom.0000205457.44750.9f  
26  
27  
28  
29 569 53 Heck JE, Chen Y, Grann VR, *et al.* Arsenic Exposure and Anemia in Bangladesh: A  
30  
31 570 Population-Based Study. *J Occup Environ Med* 2008;**50**:80–7.  
32  
33 571 doi:10.1097/JOM.0b013e31815ae9d4  
34  
35  
36 572 54 Ghimire P, Singh N, Ortega L, *et al.* Glucose-6-phosphate dehydrogenase deficiency in  
37  
38 573 people living in malaria endemic districts of Nepal. *Malar J* 2017;**16**:214.  
39  
40 574 doi:10.1186/s12936-017-1864-2  
41  
42  
43  
44 575 55 Gautam N, Gaire B, Manandhar T, *et al.* Glucose 6 phosphate dehydrogenase deficiency  
45  
46 576 and hemoglobinopathy in South Western Region Nepal: A boon or burden. *BMC Res*  
47  
48 577 *Notes* 2019;**12**:1–6. doi:10.1186/s13104-019-4762-6  
49  
50  
51 578 56 Balarajan YS, Fawzi WW, Subramanian S V. Changing patterns of social inequalities in  
52  
53 579 anaemia among women in india: Cross-sectional study using nationally representative  
54  
55  
56  
57  
58  
59  
60

- 1  
2  
3 580 data. *BMJ Open* 2013;**3**. doi:10.1136/bmjopen-2012-002233  
4  
5  
6 581 57 Wilunda C, Massawe S, Jackson C. Determinants of moderate-to-severe anaemia among  
7  
8 582 women of reproductive age in Tanzania: Analysis of data from the 2010 Tanzania  
9  
10 583 demographic and health survey. *Trop Med Int Heal* 2013;**18**:1488–97.  
11  
12 584 doi:10.1111/tmi.12199  
13  
14  
15  
16 585 58 Hakizimana D, Nisingizwe MP, Logan J, *et al*. Identifying risk factors of anemia among  
17  
18 586 women of reproductive age in Rwanda – a cross-sectional study using secondary data  
19  
20 587 from the Rwanda demographic and health survey 2014 / 2015. *BMC Public Health*  
21  
22 588 2019;:1–11. <https://www.ncbi.nlm.nih.gov/pubmed/31829161>  
23  
24  
25  
26 589 59 Lover AA, Hartman M, Chia KS, *et al*. Demographic and Spatial Predictors of Anemia in  
27  
28 590 Women of Reproductive Age in Timor-Leste : Implications for Health Program  
29  
30 591 Prioritization. *PLoS One* 2014;**9**. doi:10.1371/journal.pone.0091252  
31  
32  
33 592 60 Md. Kamruzzaman, Md. Golam Rabbani1, Aik Saw MAS and MGH. Differences in early  
34  
35 593 postnatal morbidity risk by pattern of fetal growth in Argentina. *Paediatr Perinat*  
36  
37 594 *Epidemiol*;**5**:263–75.  
38  
39  
40  
41 595 61 Adhikari RK. Food utilization practices, beliefs and taboos in Nepal—an overview. United  
42  
43 596 States Agency for International Development–Global Health Technical Report. 2010.  
44  
45 597 <http://ghpro.dexisonline.com/sites/default/files/resources/legacy/sites/default/files/1.367>  
46  
47 598 Nepal Nutrition Overview Rpt 8\_16\_10 508.pdf (accessed 19 Jan 2020).  
48  
49  
50  
51 599 62 Kandala NI, Pallikadavath S, Amos Channon A, *et al*. A multilevel approach to correlates  
52  
53 600 of anaemia in women in the Democratic Republic of Congo: findings from a nationally  
54  
55 601 representative survey. *Eur J Clin Nutr* 2020;**74**:720–31. doi:10.1038/s41430-019-0524-8  
56  
57  
58  
59  
60

- 1  
2  
3 602 63 Gebremedhin S, Enquselassie F. Correlates of anemia among women of reproductive age  
4  
5 603 in Ethiopia: Evidence from Ethiopian DHS 2005. *Ethiop J Heal Dev* 2011;**25**:22–30.  
6  
7 604 doi:10.4314/ejhd.v25i1.69842  
8  
9  
10  
11 605 64 Miller L, Hughes JP. Continuous combination oral contraceptive pills to eliminate  
12  
13 606 withdrawal bleeding: A randomized trial. *Obstet Gynecol* 2003;**101**:653–61.  
14  
15 607 doi:10.1016/S0029-7844(03)00014-0  
16  
17  
18 608 65 Bellizzi S, Ali MM. Effect of oral contraception on anemia in 12 low- and middle-income  
19  
20 609 countries. *Contraception* 2018;**97**:236–42. doi:10.1016/j.contraception.2017.11.001  
21  
22  
23 610 66 Haile ZT, Kingori C, Teweldeberhan AK, *et al.* The relationship between history of  
24  
25 611 hormonal contraceptive use and iron status among women in Tanzania: A population-  
26  
27 612 based study. *Sex Reprod Healthc* 2017;**13**:97–102. doi:10.1016/j.srhc.2017.07.003  
28  
29  
30  
31 613 67 Chandyo RK, Strand TA, Ulvik RJ, *et al.* Prevalence of iron deficiency and anemia among  
32  
33 614 healthy women of reproductive age in Bhaktapur, Nepal. *Eur J Clin Nutr* 2007;**61**:262–9.  
34  
35 615 doi:10.1038/sj.ejcn.1602508  
36  
37  
38 616 68 Hurrell RF, Reddy M, Cook JD. Inhibition of non-haem iron absorption in man by  
39  
40 617 polyphenolic-containing beverages. *Br J Nutr* 1999;**81**:289–95.  
41  
42 618 doi:10.1017/s0007114599000537  
43  
44  
45  
46  
47  
48

49 620 **Figure 1 Flow chart for sample size selection**

50  
51  
52 621 **Figure 2 Study area map and observed anaemia prevalence among women of reproductive**  
53  
54  
55 622 **age for the NDHS survey clusters**



623 **Table 1 Socio-demographic characteristics and prevalence of anaemia among women of**  
 624 **reproductive age by determining factors (n=6,414)**

625 **Table 2 Multilevel mixed-effects logistic regression for individual and community-level**  
 626 **factors affecting anaemia among women of reproductive age (n=6,414)**

627 **Figure 3 (a) Prevalence of anaemia among women of reproductive age across provinces. 3**  
 628 **(b) Prevalence of anaemia among women of reproductive age across districts**

629 **Figure 4 (a) Standardized prevalence ratio of anaemia among women of reproductive age**  
 630 **across provinces. 4 (b) Standardized prevalence ratio of anaemia among women of**  
 631 **reproductive age across districts (standardized to the national mean prevalence of 41%)**

632 **Figure 5 Spatial pattern and distribution of hot and cold spots of anaemia among women of**  
 633 **reproductive age at cluster level in Nepal**

634  
 635 **Table 1 Socio-demographic characteristics and prevalence of anaemia among women of**  
 636 **reproductive age by determining factors (n=6,414)**

| Variables                                              | Total sample   | Prevalence of any anemia |               | p-value <sup>1,2</sup> |
|--------------------------------------------------------|----------------|--------------------------|---------------|------------------------|
|                                                        |                | Frequency (%)            | Frequency (%) |                        |
| <b>Overall prevalence</b>                              | 6414           | 2614 (40.7)              | [38.5-42.9]   |                        |
| <b>Severe anemia</b>                                   | 17 (0.3)       |                          |               |                        |
| <b>Moderate anemia</b>                                 | 450 (7)        |                          |               |                        |
| <b>Mild anemia</b>                                     | 2147 (33.4)    |                          |               |                        |
| <b>Hemoglobin level, mean<br/>(<math>\pm</math>SD)</b> | 12.3 $\pm$ 1.5 | 10.8 $\pm$ 1.1           |               | <0.001*                |
| <b>Individual-level factors</b>                        |                |                          |               |                        |
| <b>Age in years, mean (<math>\pm</math>SD)</b>         | 29.1 $\pm$ 9.7 | 28.4 $\pm$ 9.5           |               | <0.001*                |
| <b>Age</b>                                             |                |                          |               | <0.001*                |
| 15-24                                                  | 2443 (38.1)    | 1065 (43.5)              | [40.6-46.5]   |                        |
| 25-34                                                  | 1971(30.7)     | 814 (41.3)               | [38.4-44.2]   |                        |
| $\geq$ 35                                              | 2000(31.1)     | 735 (36.7)               | [34-39.6]     |                        |
| <b>Education</b>                                       |                |                          |               | 0.086                  |
| No education                                           | 2144 (33.4)    | 892 (41.5)               | [38.2-44.9]   |                        |

|                                       |              |                |             |         |
|---------------------------------------|--------------|----------------|-------------|---------|
| Primary                               | 1069 (16.6)  | 411 (38.4)     | [34.2-42.8] |         |
| Secondary                             | 2277 (35.5)  | 972 (42.6)     | [39.6-45.7] |         |
| Higher                                | 924 (14.4)   | 339 (36.7)     | [32.3-41.3] |         |
| <b>Occupation</b>                     |              |                |             | 0.084   |
| Not working                           | 2096 (32.6)  | 899 (42.9)     | [39.6-46.2] |         |
| Working                               | 4318 (67.3)  | 1715 (39.7)    | [37.2-42.2] |         |
| <b>Wealth index</b>                   |              |                |             | <0.001* |
| Poorest                               | 1093 (17)    | 353 (32.3)     | [28.7-36.1] |         |
| Poorer                                | 1225 (19.1)  | 508 (41.5)     | [37.9-45.2] |         |
| Middle                                | 1317 (20.5)  | 645 (48.9)     | [45.1-52.8] |         |
| Richer                                | 1441 (22.4)  | 626 (43.4)     | [38.8-48.1] |         |
| Richest                               | 1338 (20.8)  | 482 (35.9)     | [32.1-40.1] |         |
| <b>BMI, mean (<math>\pm</math>SD)</b> | 22 $\pm$ 3.8 | 21.4 $\pm$ 3.6 |             | <0.001* |
| <b>BMI (n=6411)</b>                   |              |                |             | <0.001* |
| Normal                                | 3925 (61.2)  | 1673 (42.6)    | [39.7-45.5] |         |
| Underweight                           | 1077 (16.8)  | 518 (48.1)     | [44.6-51.6] |         |
| Overweight/obesity                    | 1408 (21.9)  | 423 (30)       | [26.7-33.4] |         |
| <b>Currently pregnant</b>             |              |                |             |         |
| No                                    | 6124 (95.4)  | 2481 (40.5)    | [38.3-42.7] | 0.081   |
| Yes                                   | 290(4.5)     | 133 (46)       | [39.4-52.7] |         |
| <b>Currently breastfeeding</b>        |              |                |             |         |
| No                                    | 4988 (77.7)  | 1961 (39.3)    | [37.1-41.6] | <0.001* |
| Yes                                   | 1426 (22.2)  | 653 (45.8)     | [42.2-49.3] |         |
| <b>Total children ever born</b>       |              |                |             | 0.612   |
| No child                              | 1842 (28.7)  | 770 (41.8)     | [38.2-45.4] |         |
| 1-3 child                             | 3386 (52.8)  | 1358 (40.1)    | [37.7-42.5] |         |
| 4+ child                              | 1186 (18.4)  | 487 (41)       | [37.2-44.8] |         |
| <b>Current contraceptive use</b>      |              |                |             | <0.001* |
| Not using                             | 3832 (59.7)  | 1625 (42.4)    | [39.8-45]   |         |
| Natural/barrier/permanent             | 1676 (26.1)  | 723 (43.1)     | [40.1-46.1] |         |
| Hormonal                              | 829 (12.9)   | 241 (29.1)     | [25.2-33.3] |         |
| IUD                                   | 77 (1.2)     | 25 (33)        | [20.8-47.9] |         |
| <b>Cigarette/smoking</b>              |              |                |             | <0.001* |
| Smoking                               | 573 (8.9)    | 156 (28.9)     | [24.7-33.4] |         |
| Not smoking                           | 5841 (91.1)  | 2449 (41.9)    | [39.7-44.1] |         |
| <b>MDD-W (n=1131)</b>                 |              |                |             | 0.025*  |
| Not diverse                           | 558 (49.3)   | 284 (51)       | [45.8-56.1] |         |
| Diverse                               | 573 (50.6)   | 248 (43.1)     | [38.2-48.2] |         |
| <b>Community-level factors</b>        |              |                |             |         |

|                                                                                                                           |             |             |             |         |
|---------------------------------------------------------------------------------------------------------------------------|-------------|-------------|-------------|---------|
| <b>Place of residence</b>                                                                                                 |             |             |             | 0.202   |
| Urban                                                                                                                     | 4029 (68.8) | 1596 (39.6) | [36.8-42.4] |         |
| Rural                                                                                                                     | 2385 (37.1) | 1018 (42.6) | [39-46.3]   |         |
| <b>Province</b>                                                                                                           |             |             |             | <0.001* |
| Province-1                                                                                                                | 1073 (16.7) | 464 (43.2)  | [37.9-48.7] |         |
| Province-2                                                                                                                | 1285 (20)   | 742 (57.7)  | [52.7-62.6] |         |
| Bagmati                                                                                                                   | 1408 (21.9) | 409 (29)    | [24.8-33.5] |         |
| Gandaki                                                                                                                   | 627 (9.7)   | 176 (28)    | [23-33.6]   |         |
| Province-5                                                                                                                | 1086 (16.9) | 472 (43.4)  | [39.4-47.5] |         |
| Karnali                                                                                                                   | 369 (5.7)   | 129 (34.9)  | [29.9-40.2] |         |
| Sudurpaschim                                                                                                              | 566 (8.8)   | 222 (39.3)  | [33.6-45.2] |         |
| <b>Community female education<sup>a</sup></b>                                                                             |             |             |             | <0.001* |
| Low                                                                                                                       | 2936 (45.7) | 1406 (47.8) | [44.8-50.9] |         |
| High                                                                                                                      | 3478 (54.2) | 1208 (34.7) | [31.9-37.6] |         |
| <b>Community female wealth index<sup>b</sup></b>                                                                          |             |             |             | <0.001* |
| Low                                                                                                                       | 4107 (64)   | 1820 (44.3) | [41.2-47.3] |         |
| High                                                                                                                      | 2307 (35.9) | 795 (34.45) | [31.1-37.8] |         |
| <b>Source of drinking water (n=6084)</b>                                                                                  |             |             |             | 0.004*  |
| Improved                                                                                                                  | 5537 (91)   | 2286 (41.2) | [38.9-43.6] |         |
| Not improved                                                                                                              | 547 (8.9)   | 184 (33.7)  | [29.2-38.5] |         |
| <b>Type of toilet facility (n=6084)</b>                                                                                   |             |             |             | <0.001* |
| Improved                                                                                                                  | 5117 (84.1) | 1972 (38.5) | [36.3-40.7] |         |
| Not improved                                                                                                              | 967 (16)    | 498 (51.4)  | [46-56.8]   |         |
| Frequency and percentage (%) are weighted                                                                                 |             |             |             |         |
| <sup>1, 2</sup> denotes Pearson Chi-Square test for categorical variables and independent t-test for continuous variables |             |             |             |         |
| *denotes statistically significant at p<0.05                                                                              |             |             |             |         |
| <sup>a</sup> mean percent of households wealth quintiles categorized richer and richest and above                         |             |             |             |         |
| <sup>b</sup> mean percent of women with primary education level and above                                                 |             |             |             |         |
| BMI: Body Mass Index                                                                                                      |             |             |             |         |
| MDD-W: Minimum Dietary Diversity for Women                                                                                |             |             |             |         |

637

638

639 **Table 2 Multilevel mixed-effects logistic regression analysis for individual and community-**  
 640 **level factors affecting anemia among women of reproductive age (n=6,414)**

| Variables                       | Model 1<br>Empty model | Model 2<br>Individual-level<br>factors | Model 3<br>community-level<br>factors | Model 4<br>Individual and<br>community-level<br>factors |
|---------------------------------|------------------------|----------------------------------------|---------------------------------------|---------------------------------------------------------|
|                                 |                        | aOR (95% CI)                           | aOR (95% CI)                          | aOR (95% CI)                                            |
| <b>Fixed-effects model</b>      |                        |                                        |                                       |                                                         |
| <b>Individual-level factors</b> |                        |                                        |                                       |                                                         |
| <b>Age</b>                      |                        |                                        |                                       |                                                         |
| 15-24                           |                        | 0.76 (0.56-1.04)                       |                                       | 0.73 (0.54-1.01)                                        |
| 25-34                           |                        | Ref                                    |                                       | Ref                                                     |
| ≥35                             |                        | 0.46 (0.24-0.88)*                      |                                       | 0.48 (0.26-0.91)*                                       |
| <b>Education</b>                |                        |                                        |                                       |                                                         |
| No education                    |                        | 2.23 (1.35-3.67)**                     |                                       | 2.07 (1.21-3.54)*                                       |
| Primary                         |                        | 1.56 (0.96-2.56)                       |                                       | 1.41 (0.84-2.38)                                        |
| Secondary                       |                        | 1.63 (1.06-2.49)*                      |                                       | 1.52 (0.96-2.38)                                        |
| Higher                          |                        | Ref                                    |                                       | Ref                                                     |
| <b>Occupation</b>               |                        |                                        |                                       |                                                         |
| Not working                     |                        | Ref                                    |                                       | Ref                                                     |
| Working                         |                        | 1.01 (0.75-1.36)                       |                                       | 0.91 (0.66-1.25)                                        |
| <b>Wealth index</b>             |                        |                                        |                                       |                                                         |
| Poorest                         |                        | Ref                                    |                                       | Ref                                                     |
| Poorer                          |                        | 1.50 (1.00-2.24)                       |                                       | 1.49 (0.97-2.29)                                        |
| Middle                          |                        | 1.81 (1.18-2.78)**                     |                                       | 1.66 (1.02-2.68)*                                       |
| Richer                          |                        | 1.46 (0.92-2.30)                       |                                       | 1.39 (0.84-2.32)                                        |
| Richest                         |                        | 1.61 (0.90-2.87)                       |                                       | 1.32 (0.69-2.52)                                        |
| <b>BMI (n=6411)</b>             |                        |                                        |                                       |                                                         |
| Normal                          |                        | Ref                                    |                                       | Ref                                                     |
| Underweight                     |                        | 1.16 (0.82-1.64)                       |                                       | 1.08 (0.74-1.56)                                        |
| Overweight/obesity              |                        | 0.90 (0.59-1.37)                       |                                       | 1.03 (0.66-1.61)                                        |
| <b>Currently pregnant</b>       |                        |                                        |                                       |                                                         |
| No                              |                        | 0.82 (0.42-1.62)                       |                                       | 1.08 (0.53-2.20)                                        |
| Yes                             |                        | Ref                                    |                                       | Ref                                                     |
| <b>Currently breastfeeding</b>  |                        |                                        |                                       |                                                         |
| No                              |                        | Ref                                    |                                       | Ref                                                     |
| Yes                             |                        | 1.38 (0.65-2.91)                       |                                       | 1.59 (0.71-3.60)                                        |
| <b>Total children ever born</b> |                        |                                        |                                       |                                                         |
| No child                        |                        | Ref                                    |                                       | Ref                                                     |

|                                               |  |                   |                     |                    |
|-----------------------------------------------|--|-------------------|---------------------|--------------------|
| 1-3 child                                     |  | -                 |                     | -                  |
| 4+ child                                      |  | 1.18 (0.74-1.86)  |                     | 1.02 (0.63-1.63)   |
| <b>Current contraceptive use</b>              |  |                   |                     |                    |
| Not using                                     |  | Ref               |                     | Ref                |
| Natural/barrier/permanent                     |  | 1.26 (0.87-1.82)  |                     | 1.26 (0.85-1.85)   |
| Hormonal                                      |  | 0.61 (0.42-0.86)* |                     | 0.57 (0.39-0.84)*  |
| IUD                                           |  | 2.54 (0.69-9.32)  |                     | 2.07 (0.68-10.61)  |
| <b>Cigarette/smoking</b>                      |  |                   |                     |                    |
| Smoking                                       |  | 0.81 (0.44-1.50)  |                     | 1.21 (0.63-2.33)   |
| Not smoking                                   |  | Ref               |                     | Ref                |
| <b>MDD-W (n=1131)</b>                         |  |                   |                     |                    |
| Not diverse                                   |  | 1.24 (0.93-1.64)  |                     | 1.03 (0.76-1.40)   |
| Diverse                                       |  | Ref               |                     | Ref                |
| <b>Community-level factors</b>                |  |                   |                     |                    |
| <b>Place of residence</b>                     |  |                   |                     |                    |
| Urban                                         |  |                   | Ref                 | Ref                |
| Rural                                         |  |                   | 1.01 (0.83-1.21)    | 0.89 (0.64-1.24)   |
| <b>Province</b>                               |  |                   |                     |                    |
| Province-1                                    |  |                   | 1.70 (1.23-2.34)**  | 3.04 (1.59-5.82)** |
| Province-2                                    |  |                   | 2.51 (1.79-3.53)*** | 3.12 (1.58-6.14)** |
| Bagmati                                       |  |                   | Ref                 | Ref                |
| Gandaki                                       |  |                   | 0.90 (0.64-1.26)    | 0.77 (0.39-1.51)   |
| Province-5                                    |  |                   | 1.60 (1.16-2.21)**  | 2.43 (1.31-4.55)** |
| Karnali                                       |  |                   | 1.19 (0.85-1.66)    | 1.69 (0.88-3.19)   |
| Sudurpaschim                                  |  |                   | 1.54 (1.11-2.15)*   | 1.64 (0.84-3.17)   |
| <b>Community female education<sup>a</sup></b> |  |                   |                     |                    |
| Low                                           |  |                   | 1.39 (1.15-1.68)*** | -                  |
| High                                          |  |                   | Ref                 | -                  |
| <b>Community wealth index<sup>b</sup></b>     |  |                   |                     |                    |
| Low                                           |  |                   | 1.48 (1.21-1.80)*** | -                  |
| High                                          |  |                   | Ref                 | -                  |
| <b>Source of drinking water (n=6084)</b>      |  |                   |                     |                    |
| Improved                                      |  |                   | Ref                 | Ref                |
| Not improved                                  |  |                   | 1.05 (0.84-1.30)    | 1.13 (0.68-1.86)   |

|                                                                                                                                                                                                                                                                                                                                                                                                                                                                                                                                                                                                                                                                                                                                                                                                                                                                                           |                  |                  |                  |                  |
|-------------------------------------------------------------------------------------------------------------------------------------------------------------------------------------------------------------------------------------------------------------------------------------------------------------------------------------------------------------------------------------------------------------------------------------------------------------------------------------------------------------------------------------------------------------------------------------------------------------------------------------------------------------------------------------------------------------------------------------------------------------------------------------------------------------------------------------------------------------------------------------------|------------------|------------------|------------------|------------------|
| <b>Type of toilet facility (n=6084)</b>                                                                                                                                                                                                                                                                                                                                                                                                                                                                                                                                                                                                                                                                                                                                                                                                                                                   |                  |                  |                  |                  |
| Improved                                                                                                                                                                                                                                                                                                                                                                                                                                                                                                                                                                                                                                                                                                                                                                                                                                                                                  |                  |                  | Ref              | Ref              |
| Not improved                                                                                                                                                                                                                                                                                                                                                                                                                                                                                                                                                                                                                                                                                                                                                                                                                                                                              |                  |                  | 1.03 (0.84-1.24) | 0.95 (0.63-1.45) |
| <b>Random-effects model</b>                                                                                                                                                                                                                                                                                                                                                                                                                                                                                                                                                                                                                                                                                                                                                                                                                                                               |                  |                  |                  |                  |
| Community-level variance ( $\tau$ ) (SE)                                                                                                                                                                                                                                                                                                                                                                                                                                                                                                                                                                                                                                                                                                                                                                                                                                                  | 0.627 (0.073)*** | 0.531 (0.207)*** | 0.414 (0.056)*** | 0.379 (0.201)**  |
| ICC (%)                                                                                                                                                                                                                                                                                                                                                                                                                                                                                                                                                                                                                                                                                                                                                                                                                                                                                   | 16               | 13.9             | 11.1             | 10.3             |
| PCV (%)                                                                                                                                                                                                                                                                                                                                                                                                                                                                                                                                                                                                                                                                                                                                                                                                                                                                                   | Ref              | 15.3             | 33.9             | 39.5             |
| <b>Model fit statistics</b>                                                                                                                                                                                                                                                                                                                                                                                                                                                                                                                                                                                                                                                                                                                                                                                                                                                               |                  |                  |                  |                  |
| AIC                                                                                                                                                                                                                                                                                                                                                                                                                                                                                                                                                                                                                                                                                                                                                                                                                                                                                       | 8322.6           | 1558.6           | 7838.4           | 1397.9           |
| BIC                                                                                                                                                                                                                                                                                                                                                                                                                                                                                                                                                                                                                                                                                                                                                                                                                                                                                       | 8336.1           | 1669.6           | 7925.8           | 1551.4           |
| Log-likelihood                                                                                                                                                                                                                                                                                                                                                                                                                                                                                                                                                                                                                                                                                                                                                                                                                                                                            | 4159.3           | 757.3            | 3906.2           | 667.9            |
| <p>Model 1 (empty model): without adjusted predictors variables; model 2: adjusted for individual-level factors; model 3: adjusted for community-level factors; model 4: adjusted for both individual-level and community-level factors.</p> <p>*<math>p &lt; 0.05</math>, **<math>p &lt; 0.01</math>, ***<math>p &lt; 0.001</math>,</p> <p>aOR=adjusted odds ratio, CI: confidence interval, Ref: reference category, SE: standard error, ICC: intra-class correlation, PCV: percentage change in variation, AIC: Akaike information criterion, BIC: Bayesian information criterion</p> <p><sup>a</sup> mean percent of households wealth quintiles categorized richer and richest and above</p> <p><sup>b</sup> mean percent of women with primary education level and above</p> <p>community female education and community wealth index is omitted in Model 4 due to collinearity</p> |                  |                  |                  |                  |

641

1  
2  
3  
4  
5  
6  
7  
8  
9  
10  
11  
12  
13  
14  
15  
16  
17  
18  
19  
20  
21  
22  
23  
24  
25  
26  
27  
28  
29  
30  
31  
32  
33  
34  
35  
36  
37  
38  
39  
40  
41  
42  
43  
44  
45  
46  
47  
48  
49  
50  
51  
52  
53  
54  
55  
56  
57  
58  
59  
60

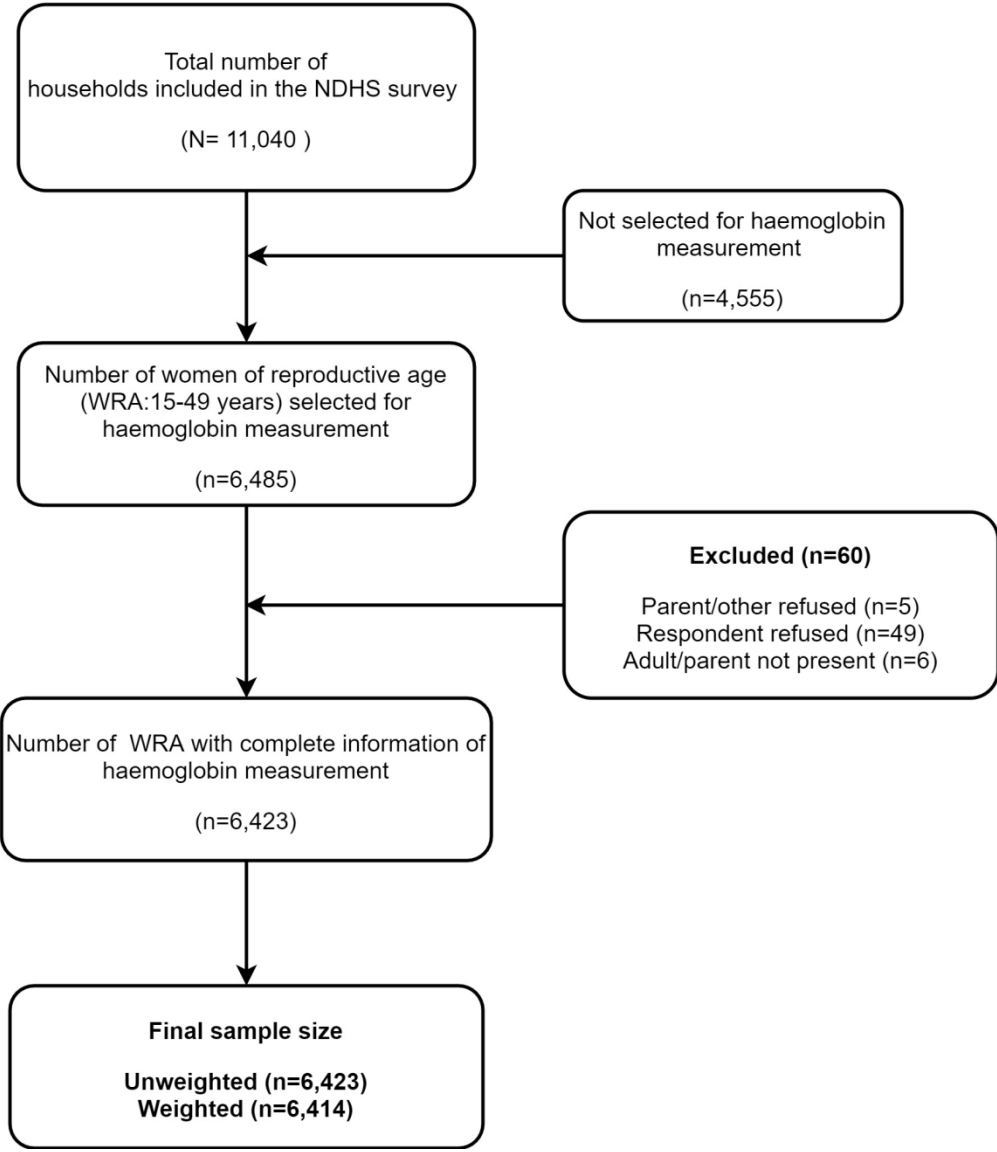

Figure 1 Flow chart for sample size selection

626x717mm (72 x 72 DPI)

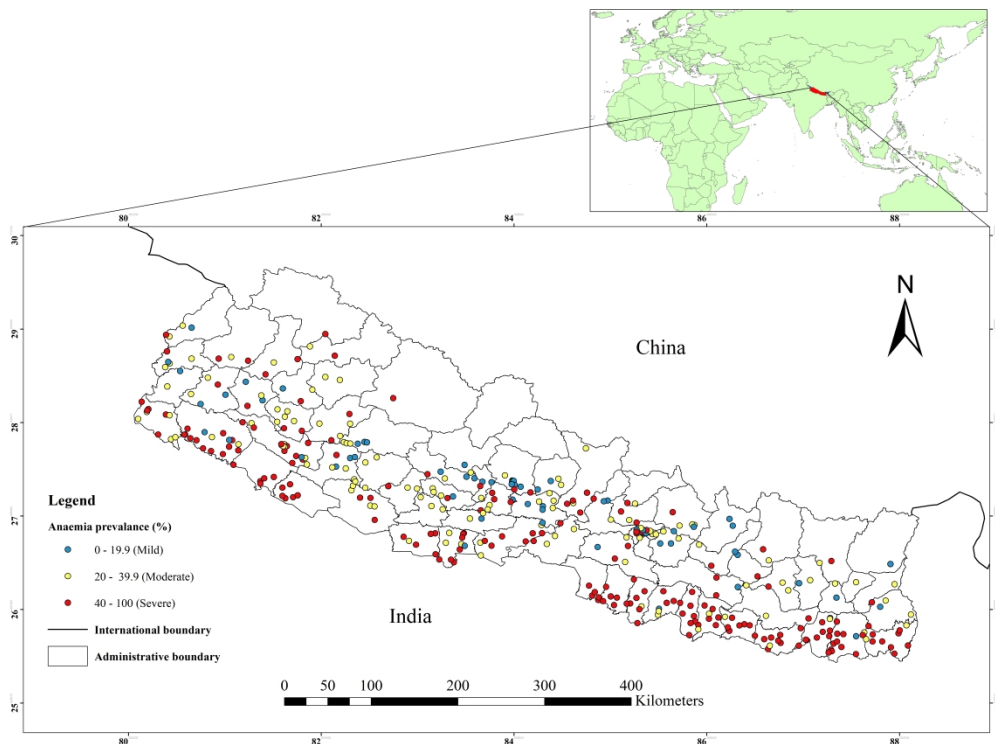

Figure 2 Study area map and observed anaemia prevalence among women of reproductive age for the NDHS survey clusters

609x457mm (300 x 300 DPI)



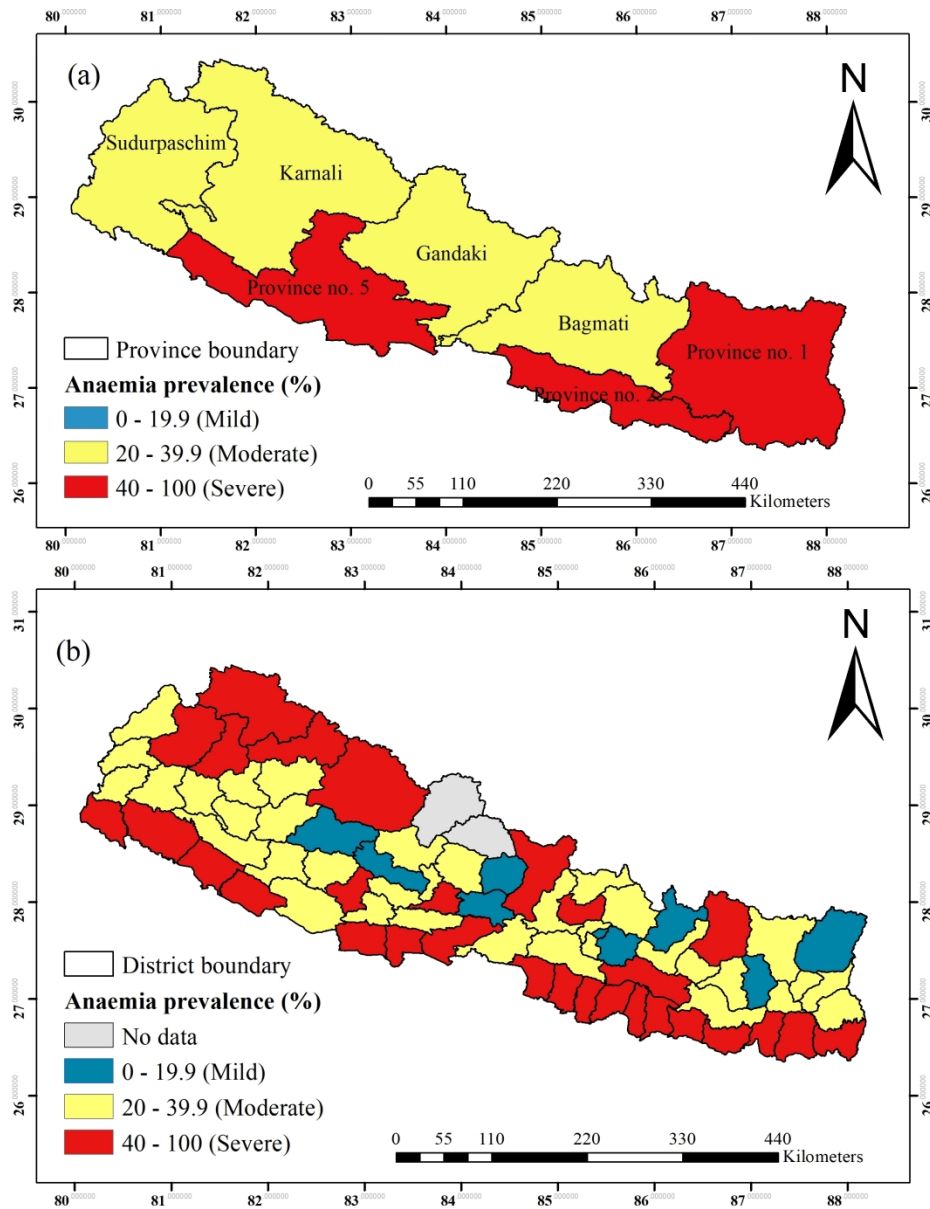

45 Figure 3 (a) Prevalence of anaemia among women of reproductive age across provinces. 3 (b) Prevalence of  
46 anaemia among women of reproductive age across districts

47 215x279mm (300 x 300 DPI)

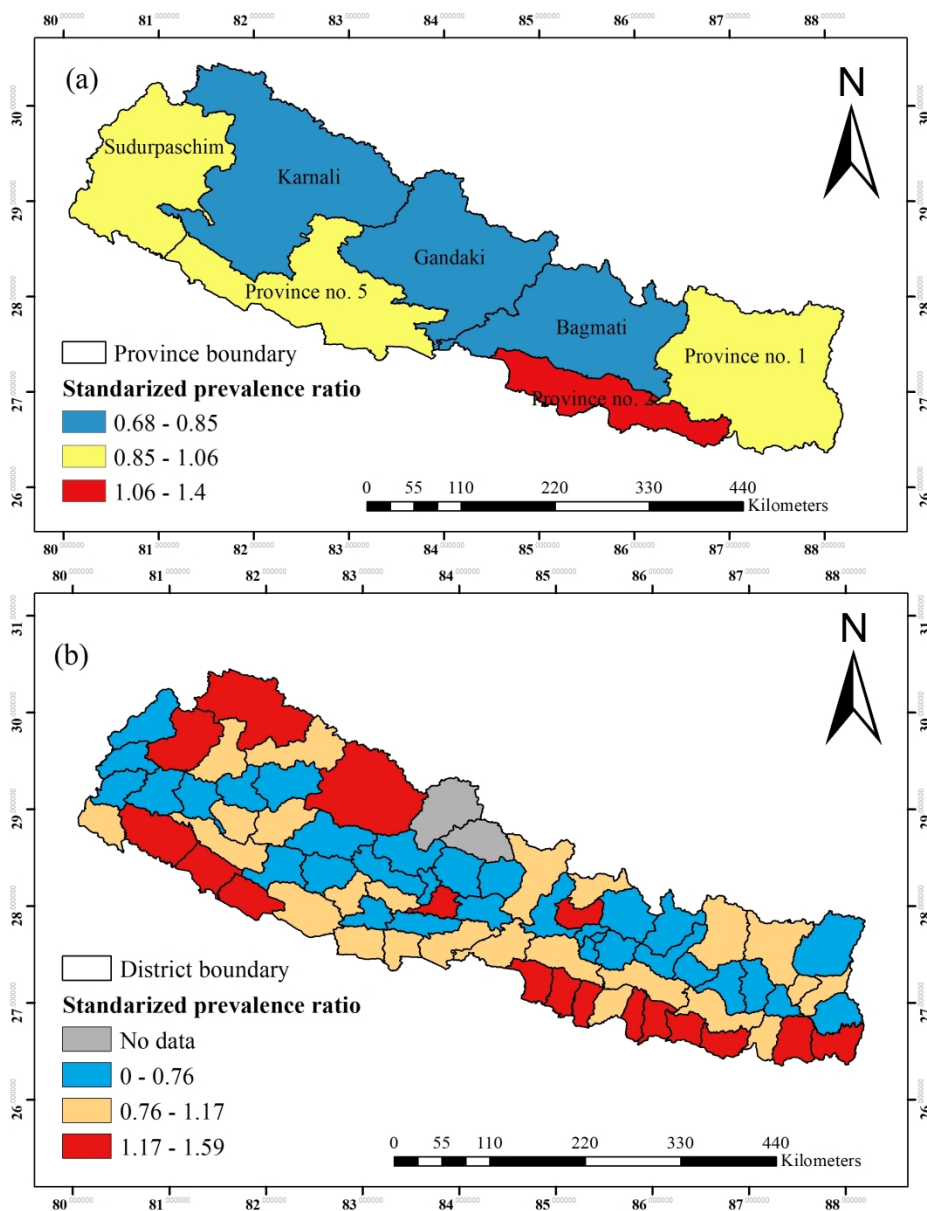

Figure 4 (a) Standardized prevalence ratio of anaemia among women of reproductive age across provinces.  
 4 (b) Standardized prevalence ratio of anaemia among women of reproductive age across districts  
 (standardized to the national mean prevalence of 41%)

215x279mm (300 x 300 DPI)

1  
2  
3  
4  
5  
6  
7  
8  
9  
10  
11  
12  
13  
14  
15  
16  
17  
18  
19  
20  
21  
22  
23  
24  
25  
26  
27  
28  
29  
30  
31  
32  
33  
34  
35  
36  
37  
38  
39  
40  
41  
42  
43  
44  
45  
46  
47  
48  
49  
50  
51  
52  
53  
54  
55  
56  
57  
58  
59  
60

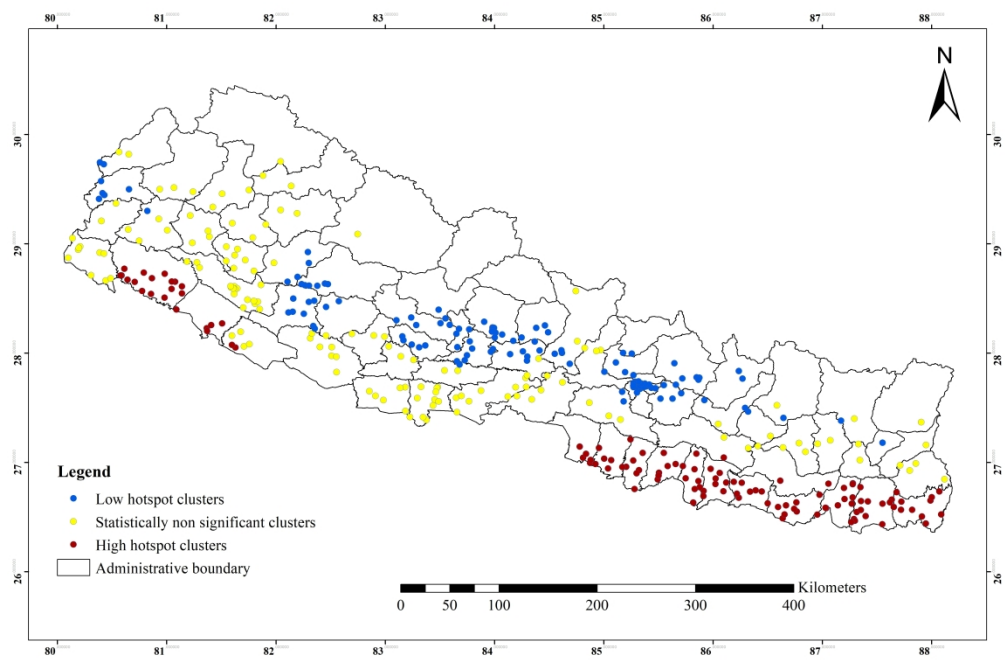

Figure 5 Spatial pattern and distribution of hot and cold spots of anaemia among women of reproductive age at cluster level in Nepal

457x304mm (300 x 300 DPI)

**S1 Table Plan for data coding and description of the study variables**

| Study variables                             | Coding category for analysis                                                                                                                                                                                                                                      |
|---------------------------------------------|-------------------------------------------------------------------------------------------------------------------------------------------------------------------------------------------------------------------------------------------------------------------|
| Age in years                                | 1=15-24; 2=25-34; 3=35-49                                                                                                                                                                                                                                         |
| Education                                   | 1=No education; 2=Primary; 3=Secondary; 4=Higher                                                                                                                                                                                                                  |
| Occupation                                  | 1= Not working; 2=Working (professional/technical/managerial, clerical, sales/services, agriculture-self-employed, skilled manual, unskilled manual, others )                                                                                                     |
| Wealth index                                | 1=Poorest; 2=Poorer; 3=Middle; 4=Richer; 5=Richest                                                                                                                                                                                                                |
| Body mass index (BMI)                       | 1=Normal (18.5-24.99); 2=Underweight(<18.5);<br>3=Overweight/Obesity( $\geq 25$ )                                                                                                                                                                                 |
| Currently pregnant                          | 1=No; 2=Yes                                                                                                                                                                                                                                                       |
| Currently breastfeeding                     | 1=No; 2=Yes                                                                                                                                                                                                                                                       |
| Total children ever born                    | 1= No child; 2=1-3 child; 3=4+ child                                                                                                                                                                                                                              |
| Current contraceptive use                   | 1=Not using; 2=Natural/barrier/permanent (Male condom, female sterilization, male sterilization, periodic abstinence, withdrawal, other traditional, lactation amenorrhea);<br>3=Hormonal (Pill, Injections, Implants/Norplant's, Emergency contraception); 4=IUD |
| Cigarette/smoking                           | 1= Smoking; 2=Not smoking                                                                                                                                                                                                                                         |
| Minimum dietary diversity for women (MDD-W) | 1=Not diverse (consume <5 food groups); 2=Diverse (Consume $\geq 5$ food groups)                                                                                                                                                                                  |
| Residence                                   | 1=Urban; 2=Rural                                                                                                                                                                                                                                                  |
| Province                                    | 1=Province-1; 2=Province-2, 3=Bagmati Province; 4=Gandaki Province; 5=Province-5; 6=Karnali Province; 7=Sudurpaschim Province                                                                                                                                     |
| Community female education                  | 1=Low (mean percent of women with lower primary education level was 0-25%); 2=High (mean percent of women with primary education level above 25%)                                                                                                                 |
| Community wealth index                      | 1=Low (mean proportion of women from richest (rich, richest) households in the community was 0-21%); 2=High (mean                                                                                                                                                 |

|                          |                                                                                                                                                                                                                                                                                                                 |
|--------------------------|-----------------------------------------------------------------------------------------------------------------------------------------------------------------------------------------------------------------------------------------------------------------------------------------------------------------|
|                          | proportion of women from richest (rich, richest) households in the community was above 21%)                                                                                                                                                                                                                     |
| Source of drinking water | 1=Improved (piped water into dwelling, piped water to yard/plot, public tap or standpipe, tube well or borehole, protected dug well-protected spring and rainwater); 2=Not improved (Piped to neighbor, unprotected well, river, dam ponds, lake, and rainwater)                                                |
| Type of toilet facility  | 1=Improved facility (flush toilet, piped sewer system, septic tank, flush/pour flush to pit latrine, ventilated improved pit latrine, pit latrine with slab, and composting toilet); 2=Not improved (flush to somewhere, flush don't know where, pit latrine without slab/open pit, and no facility/bush/field) |

**STROBE 2007 (v4) Statement—Checklist of items that should be included in reports of *cross-sectional studies***

| Section/Topic                | Item # | Recommendation                                                                                                                                                                       | Reported on page # |
|------------------------------|--------|--------------------------------------------------------------------------------------------------------------------------------------------------------------------------------------|--------------------|
| <b>Title and abstract</b>    | 1      | (a) Indicate the study's design with a commonly used term in the title or the abstract                                                                                               | 1                  |
|                              |        | (b) Provide in the abstract an informative and balanced summary of what was done and what was found                                                                                  | 1-2                |
| <b>Introduction</b>          |        |                                                                                                                                                                                      |                    |
| Background/rationale         | 2      | Explain the scientific background and rationale for the investigation being reported                                                                                                 | 4-5                |
| Objectives                   | 3      | State specific objectives, including any prespecified hypotheses                                                                                                                     | 5                  |
| <b>Methods</b>               |        |                                                                                                                                                                                      |                    |
| Study design                 | 4      | Present key elements of study design early in the paper                                                                                                                              | 5                  |
| Setting                      | 5      | Describe the setting, locations, and relevant dates, including periods of recruitment, exposure, follow-up, and data collection                                                      | 5-6                |
| Participants                 | 6      | (a) Give the eligibility criteria, and the sources and methods of selection of participants                                                                                          | 5-6                |
| Variables                    | 7      | Clearly define all outcomes, exposures, predictors, potential confounders, and effect modifiers. Give diagnostic criteria, if applicable                                             | 6-7                |
| Data sources/<br>measurement | 8*     | For each variable of interest, give sources of data and details of methods of assessment (measurement). Describe comparability of assessment methods if there is more than one group | 8-10               |
| Bias                         | 9      | Describe any efforts to address potential sources of bias                                                                                                                            | 8                  |
| Study size                   | 10     | Explain how the study size was arrived at                                                                                                                                            | 6                  |
| Quantitative variables       | 11     | Explain how quantitative variables were handled in the analyses. If applicable, describe which groupings were chosen and why                                                         | 8                  |
| Statistical methods          | 12     | (a) Describe all statistical methods, including those used to control for confounding                                                                                                | 8-10               |
|                              |        | (b) Describe any methods used to examine subgroups and interactions                                                                                                                  | 8-10               |
|                              |        | (c) Explain how missing data were addressed                                                                                                                                          | 6                  |
|                              |        | (d) If applicable, describe analytical methods taking account of sampling strategy                                                                                                   | NA                 |
|                              |        | (e) Describe any sensitivity analyses                                                                                                                                                | NA                 |
| <b>Results</b>               |        |                                                                                                                                                                                      |                    |

|                          |     |                                                                                                                                                                                                              |       |
|--------------------------|-----|--------------------------------------------------------------------------------------------------------------------------------------------------------------------------------------------------------------|-------|
| Participants             | 13* | (a) Report numbers of individuals at each stage of study—eg numbers potentially eligible, examined for eligibility, confirmed eligible, included in the study, completing follow-up, and analysed            | 10    |
|                          |     | (b) Give reasons for non-participation at each stage                                                                                                                                                         | NA    |
|                          |     | (c) Consider use of a flow diagram                                                                                                                                                                           |       |
| Descriptive data         | 14* | (a) Give characteristics of study participants (eg demographic, clinical, social) and information on exposures and potential confounders                                                                     | 10-11 |
|                          |     | (b) Indicate number of participants with missing data for each variable of interest                                                                                                                          | NA    |
| Outcome data             | 15* | Report numbers of outcome events or summary measures                                                                                                                                                         |       |
| Main results             | 16  | (a) Give unadjusted estimates and, if applicable, confounder-adjusted estimates and their precision (eg, 95% confidence interval). Make clear which confounders were adjusted for and why they were included | 11-14 |
|                          |     | (b) Report category boundaries when continuous variables were categorized                                                                                                                                    | 6     |
|                          |     | (c) If relevant, consider translating estimates of relative risk into absolute risk for a meaningful time period                                                                                             | NA    |
| Other analyses           | 17  | Report other analyses done—eg analyses of subgroups and interactions, and sensitivity analyses                                                                                                               | NA    |
| <b>Discussion</b>        |     |                                                                                                                                                                                                              |       |
| Key results              | 18  | Summarise key results with reference to study objectives                                                                                                                                                     | 14-18 |
| Limitations              | 19  | Discuss limitations of the study, taking into account sources of potential bias or imprecision. Discuss both direction and magnitude of any potential bias                                                   | 18    |
| Interpretation           | 20  | Give a cautious overall interpretation of results considering objectives, limitations, multiplicity of analyses, results from similar studies, and other relevant evidence                                   | 14-18 |
| Generalisability         | 21  | Discuss the generalisability (external validity) of the study results                                                                                                                                        | 18    |
| <b>Other information</b> |     |                                                                                                                                                                                                              |       |
| Funding                  | 22  | Give the source of funding and the role of the funders for the present study and, if applicable, for the original study on which the present article is based                                                | 19    |

\*Give information separately for cases and controls in case-control studies and, if applicable, for exposed and unexposed groups in cohort and cross-sectional studies.

**Note:** An Explanation and Elaboration article discusses each checklist item and gives methodological background and published examples of transparent reporting. The STROBE checklist is best used in conjunction with this article (freely available on the Web sites of PLoS Medicine at <http://www.plosmedicine.org/>, Annals of Internal Medicine at <http://www.annals.org/>, and Epidemiology at <http://www.epidem.com/>). Information on the STROBE Initiative is available at [www.strobe-statement.org](http://www.strobe-statement.org).

# BMJ Open

## Factors affecting anaemia among women of reproductive age in Nepal: a multilevel and spatial analysis

|                                 |                                                                                                                                                                                                                                                                                                                                                                                                                                                                                                                                                                                                                                         |
|---------------------------------|-----------------------------------------------------------------------------------------------------------------------------------------------------------------------------------------------------------------------------------------------------------------------------------------------------------------------------------------------------------------------------------------------------------------------------------------------------------------------------------------------------------------------------------------------------------------------------------------------------------------------------------------|
| Journal:                        | <i>BMJ Open</i>                                                                                                                                                                                                                                                                                                                                                                                                                                                                                                                                                                                                                         |
| Manuscript ID                   | bmjopen-2020-041982.R1                                                                                                                                                                                                                                                                                                                                                                                                                                                                                                                                                                                                                  |
| Article Type:                   | Original research                                                                                                                                                                                                                                                                                                                                                                                                                                                                                                                                                                                                                       |
| Date Submitted by the Author:   | 24-Jan-2021                                                                                                                                                                                                                                                                                                                                                                                                                                                                                                                                                                                                                             |
| Complete List of Authors:       | Sunuwar, Dev Ram; Nepal Armed Police Force, Department of Nutrition and Dietetics ; Asian College for Advance Studies, Department of Public Health<br>Singh, Devendra Raj; Purbanchal University, Asian College for Advance Studies, Department of Public Health<br>Adhikari, Bipin; Nepal Community Health and Development Center, Kathmandu, Nepal<br>Shrestha, Santosh ; Agricultural Technology Center, Lalitpur, Nepal, Agriculture Research<br>Pradhan, Pranil; Tribhuvan University Institute of Medicine, Department of Community Medicine and Public Health; Nepalese Society of Community Medicine (NESCOM), Kathmandu, Nepal |
| <b>Primary Subject Heading</b>: | Public health                                                                                                                                                                                                                                                                                                                                                                                                                                                                                                                                                                                                                           |
| Secondary Subject Heading:      | Global health                                                                                                                                                                                                                                                                                                                                                                                                                                                                                                                                                                                                                           |
| Keywords:                       | PUBLIC HEALTH, Anaemia < HAEMATOLOGY, NUTRITION & DIETETICS, Maternal medicine < OBSTETRICS                                                                                                                                                                                                                                                                                                                                                                                                                                                                                                                                             |
|                                 |                                                                                                                                                                                                                                                                                                                                                                                                                                                                                                                                                                                                                                         |

SCHOLARONE™  
Manuscripts





I, the Submitting Author has the right to grant and does grant on behalf of all authors of the Work (as defined in the below author licence), an exclusive licence and/or a non-exclusive licence for contributions from authors who are: i) UK Crown employees; ii) where BMJ has agreed a CC-BY licence shall apply, and/or iii) in accordance with the terms applicable for US Federal Government officers or employees acting as part of their official duties; on a worldwide, perpetual, irrevocable, royalty-free basis to BMJ Publishing Group Ltd ("BMJ") its licensees and where the relevant Journal is co-owned by BMJ to the co-owners of the Journal, to publish the Work in this journal and any other BMJ products and to exploit all rights, as set out in our [licence](#).

The Submitting Author accepts and understands that any supply made under these terms is made by BMJ to the Submitting Author unless you are acting as an employee on behalf of your employer or a postgraduate student of an affiliated institution which is paying any applicable article publishing charge ("APC") for Open Access articles. Where the Submitting Author wishes to make the Work available on an Open Access basis (and intends to pay the relevant APC), the terms of reuse of such Open Access shall be governed by a Creative Commons licence – details of these licences and which [Creative Commons](#) licence will apply to this Work are set out in our licence referred to above.

Other than as permitted in any relevant BMJ Author's Self Archiving Policies, I confirm this Work has not been accepted for publication elsewhere, is not being considered for publication elsewhere and does not duplicate material already published. I confirm all authors consent to publication of this Work and authorise the granting of this licence.

# 1 **Factors affecting anaemia among women of reproductive** 2 **age in Nepal: a multilevel and spatial analysis**

3 Dev Ram Sunuwar<sup>1, 2\*</sup>, Devendra Raj Singh<sup>2</sup>, Bipin Adhikari<sup>3</sup>, Santosh Shrestha<sup>4</sup>, Pranil Man  
4 Singh Pradhan<sup>5, 6</sup>

5 <sup>1</sup>Department of Nutrition and Dietetics, Nepal Armed Police Force Hospital, Kathmandu, Nepal

6 <sup>2</sup>Department of Public Health, Asian College for Advance Studies, Purbanchal University,  
7 Lalitpur, Nepal

8 <sup>3</sup>Nepal Community Health and Development Center, Kathmandu, Nepal

9 <sup>4</sup>Agricultural Technology Center, Lalitpur, Nepal

10 <sup>5</sup>Department of Community Medicine, Maharajgunj Medical Campus, Institute of Medicine,  
11 Tribhuvan University, Kathmandu, Nepal

12 <sup>6</sup>Nepalese Society of Community Medicine (NESCOM), Kathmandu, Nepal

## 13 **Corresponding author**

14 [\\*devramsunuwar@gmail.com](mailto:devramsunuwar@gmail.com)

## 15 **ABSTRACT**

16 **Objective:** The main objective of this study was to explore the factors affecting anaemia  
17 among women of reproductive age (WRA) in Nepal using spatial and multilevel epidemiological  
18 analysis.

19 **Design:** This cross-sectional study analyzed the data from the 2016 Nepal demographic and  
20 health survey (NDHS 2016). The spatial analysis was performed using ArcGIS software V.10.8  
21 to identify the hot and cold spots of anaemia among WRA (15 to 49 years). Data were analyzed  
22 using multilevel mixed-effect logistic regression analysis.

23 **Setting:** Nepal

1  
2  
3  
4 24 **Participants:** A total of 6,414 WRA were included in the analysis.  
5

6  
7 25 **Main outcome measure:** Anaemia defined by World Health Organization (WHO) as  
8  
9 26 hemoglobin level less than 12g/dL in non-pregnant women and less than 11g/dL in pregnant  
10  
11 27 women.  
12  
13

14  
15 28 **Results:** The spatial analysis showed that statistically significant hotspots of anaemia were in  
16  
17 29 the southern Terai region (4 districts in Province-1, 8 districts in Province-2, 1 district in  
18  
19 30 Bagmati province, and 3 districts in Province-5) of Nepal. At the individual level, women who  
20  
21 31 underwent female sterilization (aOR: 3.61, 95% CI: 1.10-11.84), with no education (aOR: 1.99,  
22  
23 32 95% CI: 1.17-3.39), and from middle socio-economic class families (aOR: 1.65, 95% CI: 1.02-  
24  
25 33 2.68) were more likely to be anemic, whereas, older women ( $\geq 35$  years) (aOR: 0.51, 95% CI:  
26  
27 34 0.26-0.97), and those women who were using hormonal contraceptives (aOR: 0.63, 95% CI:  
28  
29 35 0.43-0.90) were less likely to be anaemic. At the community level, women from Province-2  
30  
31 36 (aOR=2.97, 95% CI: 1.52-5.82) had higher odds of being anaemic.  
32  
33  
34  
35

36  
37 37 **Conclusion:** WRA had higher odds of developing anaemia, and it varied by the geographical  
38  
39 38 regions. Nutrition specific and nutrition sensitive interventions can tailor the interventions based  
40  
41 39 on the factors identified in this study to curb the high burden of anaemia.  
42  
43  
44  
45  
46  
47  
48  
49  
50  
51  
52  
53  
54  
55  
56  
57  
58  
59  
60

### Strengths and limitations of this study

- This study utilizes comprehensive, and nationally representative data with haemoglobin level.
- The combined statistical methods including multilevel and spatial analysis were applied, which takes into account the role of geographical risk profile and determinants of anaemia among WRA in Nepal.
- Due to the cross-sectional design, it was difficult to determine the cause-and-effect relationships between the predictors and outcome variable (anaemia).
- Other potential confounding factors of anaemia such as nutrient intake, worm infestations, other non-modifiable risk factors, and other qualitative factors were beyond the scope of this study.
- This study could not distinguish the types of anaemia such as nutritional, genetic and infectious.

40  
41  
42

## 43 INTRODUCTION

44 Anaemia remains a significant public health problem in developing countries despite advances in  
45 health science.[1] Approximately one-third of the population is affected by anaemia  
46 globally.[2,3] South and Southeast Asian countries account for the largest burden of anaemia  
47 with estimated prevalence of 52.5% among women of reproductive age (WRA).[4] The highest  
48 prevalence over the past 26 years was 55.2% in 1990.[5] Despite the implementation of a ‘1000  
49 days nutrition program’ among various other programs, targeted to a mother with newborn  
50 babies in South Asia, the reduction in anaemia among pregnant women has not been  
51 significant.[6] To accelerate reduction of anaemia, the World Health Assembly has set a target of  
52 achieving a 50% reduction of anaemia among WRA by 2025 relative to 2010.[7] However, not a  
53 single South Asian country is on the way to achieve the 2025 targets.[8]

54 The Government of Nepal has set targets in line with various global and national indicators such  
55 as Multi-Sectoral Nutrition Plan II (2018–2022), and Sustainable Development Goals (SDGs)  
56 2030 for the reduction of anaemia. [9,10] Despite the historic efforts in preventing anaemia  
57 through the implementation of national nutrition programs and policies including iron-folic acid  
58 supplementation across the country, the prevalence of anaemia among WRA has been increasing  
59 steadily from 35% in 2011 to 41% in 2016.[11,12] These figures suggest that anaemia continues  
60 to be a serious public health problem in Nepal.[13]

61 Anaemia in WRA is associated with multiple conditions and consequences such as preterm  
62 delivery,[14] miscarriage,[15] low birth weight,[16] child growth faltering, impairment of  
63 cognitive function, increased susceptibility to infection, and poverty.[17,18] It is also associated  
64 with increased risk of prenatal and maternal mortality.[16,19] Approximately 20% of maternal

1  
2  
3 65 deaths are caused by anaemia and it is also considered as an additional risk factor for 50% of all  
4  
5 66 maternal deaths.[20,21]  
6  
7

8 67 Contributing factors and distribution of anaemia include a complex interplay of political,  
9  
10 68 ecological, social, and biological factors.[22] In Nepal, anaemia among WRA is associated with  
11  
12 69 various socio-ecological factors. In the southern Terai of Nepal, low community education  
13  
14 70 status, gender based-inequality, poor health seeking behavior,[23–25] inadequate dietary intake  
15  
16 71 during pregnancy,[26–28] lack of diversified diet,[12,27,29] high burden of hookworm infection  
17  
18 72 and malaria,[30–32] and high amount of arsenic in potable water[33] were identified as factors  
19  
20 73 contributing to anaemia. On the other hand, high prevalence of anaemia in the mountainous  
21  
22 74 region were attributed to among others, food insecurity, and low dietary diversity,[12,27,34]  
23  
24 75 poor health services,[25] illiteracy, and gender based-inequality.[23,24]  
25  
26  
27  
28  
29

30 76 To decrease the burden of anaemia, it is necessary to generate adequate evidence in terms of the  
31  
32 77 role and contribution of individual, household and the community level factors along with the  
33  
34 78 geographical risk profile of anaemia. Only a few studies in the past have explored factors  
35  
36 79 affecting anaemia among WRA using nationally representative Nepal Demographic and Health  
37  
38 80 Survey (NDHS) [35–37]. Till date, no studies have used spatial data to explore the geographical  
39  
40 81 hotspots (high prevalence) of anaemia among WRA using cluster sampling of the NDHS data. In  
41  
42 82 addition, population in Nepal has diverse characteristics in terms of their culture, ethnicity and  
43  
44 83 geographical locations. Within the latitude of 193km (North to South), Nepal bears tropical/sub-  
45  
46 84 tropical landscape on the south and temperate to alpine in the North, with an elevation ranging  
47  
48 85 from 70m to the summit of Mount Everest (8848m).[38] The distinct characteristics such as  
49  
50 86 dietary habit, lifestyle and socio-economic status linked to the geographical regions of Nepal are  
51  
52 87 unique and pose risk of developing anaemia. Exploring spatial patterns and factors affecting  
53  
54  
55  
56  
57

1  
2  
3 88 anaemia by geographical region is therefore critical to inform the plans and policies for targeted  
4  
5 89 anaemia control and prevention programs.[39] The main objective of this study was to explore  
6  
7  
8 90 the spatial distribution and contributing factors of anaemia among WRA in Nepal.  
9  
10

## 11 91 **METHODS**

### 12 92 **Patient and public involvement**

13  
14  
15 93 This study utilized a publicly available data set (NDHS); therefore, there were no patients  
16  
17 94 involved.  
18  
19

### 20 95 **Data source**

21  
22 96 This study was based on the data from Nepal Demographic and Health Survey (NDHS) 2016, a  
23  
24  
25 97 nationally representative cross-sectional survey. This survey was carried out as part of the DHS  
26  
27 98 program by New ERA (a private non-profit research organization based in Kathmandu) under  
28  
29 99 the guidance of the Ministry of Health, Government of Nepal and was supported by ICF  
30  
31  
32 100 international and United States Agency for International Development (USAID). The study  
33  
34 101 population for this study was WRA from the Nepal Demographic and Health Survey 2016.  
35  
36

### 37 102 **Study settings and Sampling strategy**

38  
39 103 The sample for the 2016 NDHS was designed to provide estimates of population health, and  
40  
41 104 nutrition indicators including fertility and mortality rates for the overall country, provinces,  
42  
43 105 development regions, urban and rural municipalities, and for the ecological zones: Terai, Hills,  
44  
45  
46 106 and Mountains. The NDHS 2016 utilized a stratified, two-stage cluster sampling design. The  
47  
48 107 survey used enumeration areas (EAs) which is a primary sampling unit (PSU) and was selected  
49  
50  
51 108 from 383 wards in both rural (n=199) and urban (n=184) areas with probability proportional to  
52  
53 109 size method. In the second stage, 30 households on average within EAs were selected using a  
54  
55 110 systematic sampling technique. A more detailed methodology of the NDHS has been published  
56  
57  
58  
59  
60

1  
2  
3 111 elsewhere.[12] All WRA (pregnant and non-pregnant) with complete socio-demographic and  
4  
5 112 nutritional characteristics who were residents or who had slept in the selected households on the  
6  
7 113 night before the survey were eligible for the survey. The details of the sample size selection in  
8  
9 114 the NDHS 2016 are presented in Figure 1.

### 13 115 **Study variables**

#### 15 116 **Outcome variables**

17 117 Haemoglobin level was measured using capillary blood by a battery-operated portable HemoCue  
18  
19 118 rapid testing machine and was adjusted for altitude and smoking status.[12] According to the  
20  
21 119 WHO, for non-pregnant and pregnant women aged 15-49 years, any form of anaemia is defined  
22  
23 120 as haemoglobin concentration <12 g/dL and <11g/dL respectively.[40] The categories of  
24  
25 121 anaemia were further dichotomized into 'anaemic' and 'not anaemic'.

#### 29 122 **Predictor's variables**

31 123 Predictors of anaemia were selected based on the literature review. [4,35–37,39] The wide range  
32  
33 124 of socio-demographic, individual, household and community factors were hypothesized to  
34  
35 125 increase the likelihood of anaemia. The predictors of anaemia including both individual-level  
36  
37 126 and community-level factors were included in the analysis. The coding strategy of individual-  
38  
39 127 level and community-level factors are presented in online supplementary Table 1.

#### 43 128 **Individual-level factors**

45 129 A total of 11 individual-level factors were identified, and that included for example, respondent's  
46  
47 130 age, education level, occupation, wealth index, nutritional status, pregnancy status, and minimum  
48  
49 131 dietary diversity for WRA (MDD-W). The minimum dietary diversity for women of  
50  
51 132 reproductive age (MDD-W) was calculated using the guideline of the modified FANTA III tool  
52  
53 133 developed by the Food and Agriculture Organization (FAO) of the United Nations.[41]



### 134 **Community-level factors**

135 The six different factors were included in the community-level factors that included place of  
136 residence, province, community wealth, community female education, community safe water  
137 access, and community toilet facility. The selection of community-level factors were based on  
138 the group of women living in similar settings.[39] If more women have shared features such as  
139 place of residence, province, type of water source, and toilet facility; it was considered to have  
140 the same effect on anaemia among WRA.[39] For community level wealth and female education,  
141 we constructed the aggregate continuous community-level predictor-variables by aggregating  
142 individual-level characteristics at the community (cluster) level. We dichotomized the aggregate  
143 variables into "high" or "low" based on the distribution of the proportion values calculated for  
144 each community[42], but it was not applicable for the provinces and place of residence. Based on  
145 distribution of the aggregate variable (normal or non-normal), mean and median was used as a  
146 cut off point for the categorization of community-level variables respectively. The community  
147 wealth was categorized as 'high' if the proportion of women from richest (rich, richest)  
148 households in the community was above 21% and 'low' if the proportion was 0 to 21%.  
149 Community female education was defined as the mean percentage of women in the community  
150 with at least primary education and above.[43] Water supply and sanitation guidelines based on  
151 the WHO and UNICEF Joint Monitoring Programme (JMP) were used to define improved toilet  
152 facility and improved water source.[44]

### 153 **Data analysis**

#### 154 **Statistical analysis**

155 Data were analyzed using Stata/MP version 14.1 (StataCorp LP, College Station, Texas). The  
156 'svy' command was used to account for sampling weights, clustering, and stratification in  
157 complex survey data. Weighted frequencies, weighted percentage, mean and SD were used for

1  
2  
3 158 the descriptive analysis. Pearson Chi-Square test for categorical variables and independent t-test  
4  
5 159 for continuous variables were used. The multilevel mixed-effect logistic regression analysis was  
6  
7 160 performed to estimate the adjusted odds ratio and to estimate the extent of random variations  
8  
9 161 between communities.  
10  
11  
12

13 162 Four models were created and were fitted. Model 1 (empty model) was fitted without predictor  
14  
15 163 variable to test random variability in the intercept and to estimate the intra-class correlation  
16  
17 164 (ICC).[45] Model 2 examined the effects of individual-level characteristics, model 3 examined  
18  
19 165 the effects of community-level variables, and model 4 examined the effects of both individual  
20  
21 166 and community-level characteristics simultaneously. In the multilevel mixed-effect logistic  
22  
23 167 regression models, the fixed effects estimated the association between the likelihood of anaemia  
24  
25 168 among WRA and the individual-level and community-level factors, and the findings are reported  
26  
27 169 in terms of adjusted odds ratio (aOR), and 95% confidence intervals (CIs). To prevent statistical  
28  
29 170 bias in the multilevel logistic regression model, we examined and reported multicollinearity  
30  
31 171 among the predictor variables using variation inflation factors (VIF). In this study, we used "10"  
32  
33 172 as a cut-off value for the maximum level of VIF.[46] The random effects are expressed as  
34  
35 173 ICC,[45] and proportional change in variance (PCV).[47] The ICC was calculated to evaluate the  
36  
37 174 cluster variability; and PCV can measure the total variation due to factors at the individual- and  
38  
39 175 community- levels.[45] Models fit were assessed using Akaike information criterion (AIC) and  
40  
41 176 the Bayesian information criterion (BIC). Considering the nested structure of the survey data, a  
42  
43 177 multilevel model is considered to be appropriate than ordinary single-level regression model  
44  
45 178 because it provides correct parameter estimates by handling the cluster data.[48,49]  
46  
47  
48  
49  
50  
51  
52

### 53 179 **Spatial analysis**

54  
55  
56  
57  
58  
59  
60

1  
2  
3 180 Spatial analysis were performed using ArcGIS software V.10.8, and base files of the  
4  
5 181 administrative provinces and districts of Nepal were obtained from Government of Nepal,  
6  
7 182 Ministry of Land Management, [50] and Natural Earth.[51] The global positioning system (GPS)  
8  
9 183 data set for NDHS was obtained from the DHS website after receiving the approval letter. The  
10  
11 184 prevalence of anaemia and standardized prevalence ratio were computed for both the districts  
12  
13 185 and provinces in Stata/MP version 14.1 software and were later transferred to Excel spreadsheet.  
14  
15 186 These data were imported into the ArcGIS software to link the reported anaemia prevalence for  
16  
17 187 each cluster to the corresponding geographical location (survey cluster data). The spatial  
18  
19 188 variations of the prevalence of anaemia among WRA by both districts and provinces were  
20  
21 189 visualized. To estimate the standardized prevalence ratio (SPR; ratio of observed prevalence to  
22  
23 190 expected prevalence)[52] of anaemia among WRA, we first determined the prevalence of  
24  
25 191 anaemia for both districts and provinces. District and province wise prevalence rate of anaemia  
26  
27 192 among WRA was multiplied by the national prevalence rate of 41% (normalized to the national  
28  
29 193 prevalence of 41%).  
30  
31  
32  
33  
34  
35

36 194 The Local Moran's I, Gettis-Ord G-statistics tool in ArcGIS software was used to compute to  
37  
38 195 measure how spatial autocorrelation of anaemia among WRA varies across different locations in  
39  
40 196 Nepal. The Getis-Ord G-statistics identifies statistically significant spatial clusters of hotspot  
41  
42 197 clusters (High-High), and cold spot clusters (Low-Low).[53,54] Hotspot analysis computes Z-  
43  
44 198 score and p-value to determine the statistical significance of the clustering of anaemia over the  
45  
46 199 study area at different significance levels simultaneously. [54,55] The statistical significance of  
47  
48 200 autocorrelation was determined by z-scores and p-value  $\leq 0.05$  with a 95% Confidence Intervals  
49  
50 201 (CIs).[39,55] An anaemia hot spot was defined as the occurrence of high prevalence rates of  
51  
52 202 anaemia clustered together on the map. Anaemia cold spot was referred to the occurrence of low  
53  
54  
55  
56  
57  
58  
59  
60

1  
2  
3 203 prevalence rates of anaemia clustered together on the map.[39,55] The spatial pattern and  
4  
5 204 distribution of anaemia prevalence rates among WRA in Nepal are visualized on the map (Figure  
6  
7  
8 205 2)  
9

## 10 206 **Ethical consideration**

11 207 The DHS survey protocols were approved by the institutional review boards of ICF, the DHS  
12  
13 208 program, and the Nepal Health Research Council (NHRC). The details on ethical procedures  
14  
15 209 used in this survey have been published elsewhere.[12] We registered and requested for access to  
16  
17 210 both main data and GPS data from the DHS website [56] and received an approval to access and  
18  
19 211 download the DHS data file. DHS program collected data following a written informed consent  
20  
21 212 from each individual. All individual identifiers were precluded from the final dataset in this  
22  
23 213 study.  
24  
25  
26  
27  
28  
29

## 30 214 **RESULTS**

### 31 215 **Socio-demographic characteristics of study participants**

32 216 In this study, a total of 6,414 WRA were included in the analysis (Table 1). The mean ( $\pm$ SD) age  
33  
34 217 of the study participants was 29 ( $\pm$ 9.7) years. More than one third (38.1%) of the participants  
35  
36 218 were from age group 15-24 years, and women (35.5%) had attended secondary level of  
37  
38 219 education. Nearly one quarter (22.4%) of study participants were from richer wealth quintiles  
39  
40 220 and more than half (59.7%) of the women were not using any contraceptive methods, and a half  
41  
42 221 (50.6%) of the participants consumed more than five food types. More than three quarters  
43  
44 222 (77.1%) of participants had mosquitoes bed nets for sleeping. High proportion of women  
45  
46 223 (68.8%) belonged to urban areas, and were from Bagmati province (21.9%). More than half  
47  
48 224 (54.2%) of the women had the highest percentage of community female education, whilst, nearly  
49  
50 225 two-thirds (64%) of the women belonged to a low percentage of community female wealth  
51  
52  
53  
54  
55  
56  
57  
58  
59  
60

226 index. Majority of the participants had improved sources of drinking water (91%) and type of  
227 toilet facility (84.1%). (Table 1)

### 228 **Prevalence of anaemia among women of reproductive age**

229 In the current study, the overall prevalence of any anaemia across Nepal was 41% (95% CI:  
230 38.5-42.9%). At the individual level, the prevalence of anaemia was higher among younger age  
231 groups (43.6 %), and women who attended at least secondary level education (42.7 %). The  
232 higher prevalence of anaemia were found in middle socio-economic class families (48.9%). The  
233 prevalence of anaemia was more among women who had undergone female sterilization  
234 (53.7%), and those who consumed less than five food groups (51%). At the community-level, the  
235 prevalence of anaemia was higher in women who came from Province-2 (57.7%). The high  
236 prevalence of anaemia was found in community with low female education (47.9 %), female  
237 wealth index (44.3%), and who did not have improved toilet facility (51.5 %) (Table 1).

### 239 **Factors affecting anaemia among women of reproductive age**

240 The fixed effects (a measure of association) and the random-effects for the risk of developing  
241 anaemia among WRA are presented in Table 2. The results of the empty model (model 1)  
242 showed that there was statistically significant variability in the odds of anaemia between  
243 communities ( $\tau=0.627$ ,  $p<0.001$ ). The ICC in the empty model implied that 16% of the total  
244 variance for the risk of developing anaemia was attributed to differences between the  
245 communities. In individual-level factors (model 2), women who did not have formal education  
246 (aOR=2.22, 95% CI: 1.35-3.82) compared to those with higher education, and who belonged to  
247 middle-class families (aOR=1.38, 95% CI: 0.86-2.20) compared to the family from poorest  
248 families were found to have higher odds of anaemia. Older women had 52% lower (aOR=0.48,  
249 95% CI: 0.24-0.83) odds of developing anaemia compared to younger women. Women who used

1  
2  
3 250 hormonal contraceptive methods had 35% lower (aOR=0.65, 95% CI: 0.46-0.92) odds of  
4  
5 251 anaemia compared to who did not use contraceptive methods. The ICC in model 2 indicated that  
6  
7 252 11.8% of the variation in WRA anaemia was attributable to differences across communities. The  
8  
9 253 PCV indicated that 29.3% of the variance in WRA anaemia across communities was explained  
10  
11 254 by the individual-level characteristics.  
12  
13  
14

15 255 The community-level (model 3) showed that women from Province-2 had 2.5 times higher  
16  
17 256 (aOR=2.51, 95% CI: 1.79-3.53) odds of anaemia compared to women from Bagmati province.  
18  
19 257 Women who belonged to communities with a low percentage of the wealthy households had 1.48  
20  
21 258 times higher (aOR=1.48, 95% CI: 1.21-1.80) odds of anaemia compared to those coming from  
22  
23 259 high percentage of the wealthy household; and women residing in communities with a low  
24  
25 260 percentage of community female education had 1.39 times higher (aOR=1.39, 95% CI: 1.15-  
26  
27 261 1.68) odds of anaemia compared to those coming from the communities with a high percentage  
28  
29 262 of education. The ICC in model 3 showed that differences between communities accounted for  
30  
31 263 about 11.1% of the variation in anaemia among WRA. In addition, the PCV indicated that 33.9%  
32  
33 264 of the variation in WRA anaemia between communities was explained by community-level  
34  
35 265 characteristics.  
36  
37  
38  
39  
40  
41

42 266 In model 4, women who had undergone female sterilization were at higher (aOR: 3.61, 95% CI:  
43  
44 267 1.10-11.84) odds of anaemia compared to those who did not use contraceptive methods. Women  
45  
46 268 with no formal education were found to have 2 times higher (aOR=1.99, 95% CI: 1.17-3.39)  
47  
48 269 odds of anaemia compared to women who had higher education. Women from middle socio-  
49  
50 270 economic family had higher (aOR=1.65, 95% CI: 1.02-2.68) odds of anaemia compared to  
51  
52 271 poorest counterparts. Women who came from Province-2 (aOR=2.97, 95% CI: 1.52-5.82) had  
53  
54 272 higher odds of anaemia compared to Bagmati province. The older women had 49% lower  
55  
56  
57  
58  
59  
60

273 (aOR=0.51, 95% CI: 0.26-0.97) odds of anaemia compared to younger women, and women who  
274 used hormonal contraceptive methods had 37% lower (aOR=0.63, 95% CI: 0.43-0.90) odds of  
275 anaemia compared to who did not use contraceptive methods. After the inclusion of both the  
276 individual and community-level variables in model 4, the ICC indicated that 9.5% of the  
277 variability in anaemia among WRA was attributable to the difference between communities.  
278 Furthermore, the PCV indicated that 44.6% of the variation in anaemia among WRA between  
279 communities was explained by both individual and community-level characteristics (Table 2).

### 280 **Spatial data analysis**

281 Figure 3(a) shows the prevalence of anaemia among WRA across provinces in Nepal. A severe  
282 anaemia prevalence ( $\geq 40\%$ ) among WRA was seen in Province-2, followed by Province-1 and 5.  
283 The prevalence of moderate anaemia (20-39.9%) was observed in Bagmati, Gandaki, Karnali,  
284 and Sudurpaschim province. Mild anaemia (prevalence $<19.9\%$ ) was not found in any provinces.  
285 Figure 3(b) shows the prevalence of anaemia among WRA across 75 districts in Nepal. The  
286 prevalence rate of severe anaemia was observed in 29 out of 75 districts, and mild anaemia was  
287 found in only eight districts (Figure 3).

288 The standardized prevalence ratio by provinces (standardized to the national mean prevalence of  
289 41%) are shown in Figure 4 (a), and ranged from 0.68 to 1.4. The higher prevalence ratio of  
290 anaemia was found in Province-2, whereas a lower prevalence ratio was observed in Bagmati,  
291 Gandaki, and Karnali province. Figure 4 (b) shows the standardized prevalence ratio across the  
292 75 districts, and ranged from 0.76 to 1.59. The higher standardized prevalence ratio of anaemia  
293 was observed in 17 out of 75 districts across the country (Figure 4).

1  
2  
3 294 The spatial pattern and distribution of anaemia among WRA at the cluster level are displayed in  
4  
5 295 Figure 5. The spatial analysis at the cluster level showed that statistically significant high  
6  
7  
8 296 hotspots of anaemia were observed in the southern Terai of the country bordering India:  
9  
10 297 Province-2 (8 districts), Province-1 (4 districts), southern plain of the Bagmati province (1  
11  
12 298 district), and southwestern region of Province-5 (3 districts). Whilst, cold spots of anaemia were  
13  
14  
15 299 observed in most of the Hilly regions of the country (Figure 5).  
16  
17

## 18 300 **DISCUSSION**

19  
20 301 In this study, more than 40% of WRA were anaemic which implies that anaemia is still an  
21  
22 302 important public health problem in Nepal.[40] Geographical pattern showed that anaemia is an  
23  
24 303 important public health problem in three of the seven provinces and 29 out of the 75 districts in  
25  
26  
27 304 Nepal. The higher prevalence of anaemia was observed in the southern Terai bordering India  
28  
29 305 particularly in Province-2, and the upper Himalayan region of the country. The spatial analysis at  
30  
31 306 the cluster level showed that high hot spots of anaemia were observed in Terai region especially  
32  
33  
34 307 in Province 1, 2 and 5. These findings are consistent with a previous study [57] which was based  
35  
36 308 on the analysis of Nepal National Micronutrient Status Survey 2016 and found WRA living in  
37  
38 309 the Terai ecological zone had higher odds of anaemia relative to women living in the Mountain  
39  
40 310 and Hill regions. A possible reason could be that in the Terai region, there is a shortage of safe  
41  
42  
43 311 and adequate drinking water supply and the risks of malaria and hookworm infestation are high.  
44  
45 312 [30]

46  
47  
48 313 In the southern Terai of Nepal, despite ecological richness, people have long suffered from a  
49  
50 314 deficiency of micronutrients such as Vitamin A, iron and zinc,[26] and a high burden of  
51  
52 315 hookworm infestation and malaria which can contribute to development of anaemia.[30] Diet of  
53  
54  
55 316 women in the Terai lack diversity and, nutrient adequacy which pose an increased risk of  
56  
57



1  
2  
3 317 anaemia.[27] Terai region of Nepal is endemic to malaria in contrast to Hill and Mountain region  
4  
5 318 of Nepal, [31,32,58] and thus poses higher risk of anaemia.[30] The majority (90%) of the  
6  
7 319 population from Terai region rely on groundwater especially shallow tube well for domestic  
8  
9 320 purposes including drinking whereas most of the people from Mountain and Hill region rely on  
10  
11 321 municipal taps, spring water source, and stone spouts as drinking water sources. Terai region is  
12  
13 322 the most densely populated region compared to Hill and Mountain regions of Nepal. The  
14  
15 323 population of Terai increased dramatically after the 1970s because people from the Mountains  
16  
17 324 and Hills migrated to Terai for permanent settlement. [33] Most of the water wells were  
18  
19 325 installed to meet the growing population demand. However, well water in the Terai consists of  
20  
21 326 high arsenic concentrations ( $>10 \mu\text{g}/\text{L}$ ) beyond the WHO recommendation. [33] A previous  
22  
23 327 study also explained the high burden of anaemia might be due to chronic exposure to arsenic  
24  
25 328 through contaminated groundwater in Terai region. [57] Higher arsenic concentration can inhibit  
26  
27 329 haem iron metabolism and increase erythrocyte hemolysis.[59] Consequently, drinking arsenic-  
28  
29 330 containing water poses an increased risk of anaemia among women.[60] Arsenic exposure was  
30  
31 331 more likely to cause anaemia among women in Bangladesh.[61] The spatial analysis at the  
32  
33 332 cluster level found that high hotspots of anaemia were also observed in southwestern region  
34  
35 333 (Province-5, and southern plain of Sudurpaschim province), particularly Banke, Bardiya and  
36  
37 334 Kanchanpur district. A previous study highlighted that Glucose 6 phosphate dehydrogenase  
38  
39 335 deficiency (G6PDd), sickle cell trait (SCT), and sickle cell anaemia (SCA) as the most common  
40  
41 336 disorder in Tharu communities living in southwestern province-5, and sudurpaschim province  
42  
43 337 [62,63]. Study based on the Nepal National Micronutrient Status Survey 2016 also found the  
44  
45 338 G6PD and haemoglobinopathies had strong association with anaemia among WRA.[57]  
46  
47  
48  
49  
50  
51  
52  
53  
54  
55  
56  
57  
58  
59  
60

1  
2  
3 339 The geographical variance of high cases of anaemia across the high Mountainous region could be  
4  
5 340 attributed to food insecurity, low dietary diversity, [12,27,34] less calorie diet,[27] poor health  
6  
7 341 service coverage,[25] high illiteracy, gender based-inequality, and poor health seeking  
8  
9  
10 342 behaviour.[23,24]

### 11 343 **Socio-demographic characteristic among women and anaemia**

12 344 Women who had no formal education, and those who came from middle socio-economic  
13  
14 345 households, and from younger age group were at increased risk of anaemia. These findings are in  
15  
16 346 line with previous studies from low and middle-income countries (LMICs) including  
17  
18 347 Ethiopia,[39] India,[64] Tanzania,[65] Rwanda,[66] Timor-Leste,[67] and Bangladesh.[68]  
19  
20 348 Studies from Ethiopia and Tanzania suggest that higher-level education might enable women to  
21  
22 349 gain knowledge and improve attitude which in turn can promote them to adopt healthier lifestyle  
23  
24 350 including good nutrition habits, better health-seeking behavior, and good hygiene practices that  
25  
26 351 can prevent anaemia.[39,65]

27  
28 352 Anaemia is a multifaceted problem where nutrition and household economic status are  
29  
30 353 considered to have a synergistic association.[66] Women belonging to poorer households are  
31  
32 354 more likely to be anaemic compared to those living in middle or richer households in most of the  
33  
34 355 countries.[17,39,66]. Contrastingly, this study revealed that poorer Nepalese women were less  
35  
36 356 likely to be anaemic. Similar findings were reported by a previous study which was based on the  
37  
38 357 analysis of the 2016 NDHS dataset.[36] The possible reason could be first, Nepal is an agrarian-  
39  
40 358 based country and the staple diet may be similar for most of the households.[69] Second, poorer  
41  
42 359 Nepalese women being at lower risk of anaemia might be due to the nationwide open defecation  
43  
44 360 free (ODF) campaign initiated after 2011, which was targeted at poor households which  
45  
46 361 contributed to the reduction of anaemia through the reduction in prevalence of helminthiasis.  
47  
48  
49  
50  
51  
52  
53  
54  
55  
56  
57  
58  
59  
60

1  
2  
3 362 [36] Third, there was various ongoing health and nutrition intervention program targeted at  
4  
5 363 poorer households. For instance, consumption of iron-rich dark green leafy vegetables available  
6  
7 364 from their kitchen garden,[70] consumption of animal source foods, and dietary iron  
8  
9 365 consumption. Interventions such as Suaahara-I (from 2011 to 2016), and Sunaula Hazar Din  
10  
11 366 (from 2014 to 2017), which provided financial and technical support to poor households for  
12  
13 367 poultry farming, and contributed to increased consumption of meat and eggs among  
14  
15 368 WRA.[71,72] Future studies are critical to explore the association of household economic status  
16  
17 369 and anaemia among WRA in Nepal.

18  
19  
20  
21  
22 370 In this study, the prevalence of anaemia was found to be decreasing with increasing age. These  
23  
24 371 findings are consistent with studies from Nepal, [36] Ethiopia,[39] Demographic Republic of  
25  
26 372 Congo,[73] and Benin.[60] The possible reason could be that the low fertility rates are high  
27  
28 373 among older women.[39] Also, it might be due to young girls being under-represented in the  
29  
30 374 public health programs that aim to prevent anaemia in Nepalese context. [36] However,  
31  
32 375 Government of Nepal has started weekly iron folic acid supplementation to adolescent girls aged  
33  
34 376 10–19 years only after 2016.[74] In contrast, few studies from Nepal did not show any  
35  
36 377 association of age with anaemia.[35,37] The discrepancies might be due to the nature of  
37  
38 378 statistical model used in the analysis.

### 379 **Effect of contraceptive use on anaemia**

380 In this study, those using hormonal contraceptive were less likely to be anaemic among WRA  
381 which is consistent with previous studies conducted in Nepal,[35,36] Rwanda,[66] Tanzania,[65]  
382 and Ethiopia.[75] This could be due to multiple reasons. For instance, use of hormonal  
383 contraceptive can reduce the blood loss during the menstruation.[76,77] Almost 100-150 mg of  
384 iron is lost during menstrual bleeding.[78] Subsequently, this may directly or indirectly furnish

1  
2  
3 385 iron loss among women at high risk for iron-deficiency anaemia.[77,78] A previous study also  
4  
5 386 suggested that Depo-Provera injections were more likely to increase haemoglobin concentration  
6  
7 387 among WRA in Nepal.[79] Interestingly, in this study women who had undergone female  
8  
9 388 sterilization were at increased risk of anaemia. These findings are in line with the similar study  
10  
11 389 conducted in Nepal.[36,80]  
12  
13  
14

### 15 390 **Community-level factors and anaemia**

16  
17 391 In this study, estimated intra-class correlation (ICC) shows that about 9.5% of the community  
18  
19 392 level variability was attributable to the difference between communities among WRA. The PCV  
20  
21 393 indicated that 44.6% of the variation in WRA anaemia between communities was explained by  
22  
23 394 both individual and community-level characteristics. This finding is in line with the study  
24  
25 395 conducted in Ethiopia, where both individual- and community-level factors accounted for about  
26  
27 396 43% of the variability of anaemia among WRA.[39] Women who came from Province-2 had  
28  
29 397 more than two times higher odds of anaemia compared to Bagmati province. Previous studies  
30  
31 398 reported that women from province number 2 were more likely to be coming from lower  
32  
33 399 socioeconomic status and less diverse diet (an estimated 29% of minimum dietary diversity  
34  
35 400 (MDD)). [12,29] Other evidence from Nepal also suggested that women in Province 2 have poor  
36  
37 401 nutritional status.[81] In addition, compliance rate of recommended dose of iron tablets amongst  
38  
39 402 the pregnant mothers in Province-2 was also low (28%) compared to other provinces.[12] This  
40  
41 403 study showed that promoting community female education has a potential role in lowering the  
42  
43 404 likelihood of anaemia which echoes with a study from Malawi.[42] This could be explained by  
44  
45 405 the fact that higher community education provides a context where women are enabled to gain  
46  
47 406 nutritional knowledge and material resources [28] that can increase consumption of iron-  
48  
49 407 absorption-enhancers such as vitamin C, phytates (whole grains, legumes), and calcium (dairy  
50  
51  
52  
53  
54  
55  
56  
57  
58  
59  
60

1  
2  
3 408 products). Increasing community level education can play an important role in promoting  
4  
5 409 knowledge and attitude which in turn can incite them to adopt healthier lifestyle including good  
6  
7 410 nutrition habits that can ultimately prevent anaemia.[39,65,70]  
8  
9

### 10 411 **Strength and limitation**

11  
12 412 This study is conducted based on the spatial pattern and multilevel epidemiological analysis of  
13  
14 413 anaemia among WRA in Nepal using cluster sampling of nationally representative data. The  
15  
16 414 combined statistical methods including multilevel and spatial analysis used in this study provides  
17  
18 415 important insights on the role of contextual factors and geographical patterns in the occurrences  
19  
20 416 of anaemia among WRA in Nepal. This study has some limitations. The cross-sectional design of  
21  
22 417 the study does not allow us to establish the causality. This study relied on haemoglobin as the  
23  
24 418 measure of anaemia; further studies should consider other indices that include total ferritin and  
25  
26 419 total iron binding capacity to differentiate the types of anaemia. Since this study is based on the  
27  
28 420 secondary data analysis, we are unable to incorporate potential confounding factors of anaemia  
29  
30 421 such as nutrient intake, worm infestations, and other non-modifiable risk factors.  
31  
32  
33  
34  
35

### 36 422 **CONCLUSION**

37  
38 423 This study highlighted a high prevalence of anaemia among WRA across Nepal. At an individual  
39  
40 424 level, women who had no formal education, those who came from middle socio-economic class  
41  
42 425 families were more likely to be anaemic, whereas, older women, and those who used hormonal  
43  
44 426 contraceptive were less likely to be anaemic. At the community level, low community female  
45  
46 427 education, and women living in Province-2 were associated with increased odds of anaemia. In  
47  
48 428 the spatial analysis, our study found statistically significant hot spots in the southern Terai region  
49  
50 429 particularly in Province-1 (4 districts), Province-2 (8 districts), Bagmati province (1 district), and  
51  
52 430 Province-5 (3 districts). Both nutrition specific and nutrition sensitive interventions such as  
53  
54  
55  
56  
57  
58  
59  
60

1  
2  
3 431 social and behavioral programs can tailor their strategies based on the factors identified in this  
4  
5 432 study to reduce the high burden of anaemia.  
6  
7

## 8 433 **Acknowledgements**

9  
10 434 We thank Measure DHS, ICF Macro for granting free access to the data used in this analysis. We  
11  
12  
13 435 are grateful to Professor Dr. Kalpana Tiwari, Director of Research and Planning Purbanchal  
14  
15 436 University, Faculty of Science and Technology, College of Applied Food and Dairy Technology,  
16  
17 437 Kathmandu Nepal for assistance of undertaking this research.  
18  
19

## 20 438 **Contributors**

21  
22  
23 439 Dev Ram Sunuwar (DRSu), Devendra Raj Singh (DRSi), Bipin Adhikari (BA), Santosh Shrestha  
24  
25 440 (SS), and Pranil Man Singh Pradhan (PMSP). DRSu designed, conceptualized the study, data  
26  
27 441 extraction and analysis, interpreted the results, generate the map, writing an original draft,  
28  
29 442 reviewing, editing, and overall supervision of the research. SS generate the map, and writing an  
30  
31 443 original draft. DRSi, BA, and PMSP writing an original draft, reviewing and editing, overall  
32  
33 444 supervision of the research. All authors read and approved the final manuscript.  
34  
35  
36

## 37 445 **Funding**

38  
39 446 This research received no specific grant from any funding agency in the public, commercial or  
40  
41 447 not-for-profit sectors.  
42  
43  
44

## 45 448 **Competing interests**

46  
47 449 None declared  
48  
49

## 50 450 **Patient consent for publication**

51  
52 451 Not required  
53  
54

## 55 452 **Ethical approval**

1  
2  
3 453 The NDHS 2016 was approved by the Nepal Health Research Council (NHRC) and ICF Macro.  
4  
5

## 6 454 **Data sharing statement**

7  
8 455 Dataset used in this study is publicly available from the DHS website (URL:

9  
10  
11 456 <https://www.dhsprogram.com/data/available-datasets.cfm>).  
12  
13

14 457  
15  
16

## 17 458 **REFERENCES**

- 19  
20 459 1 Benoist BD, McLean E, Egli I, Cogswell M, Editors. Worldwide prevalence of anaemia  
21  
22 460 1993–2005.  
23  
24 461 2008.[http://apps.who.int/iris/bitstream/handle/10665/43894/9789241596657\\_eng.pdf?seq](http://apps.who.int/iris/bitstream/handle/10665/43894/9789241596657_eng.pdf?sequence=1)  
25  
26 462 uence=1 (accessed 27 Mar 2018).  
27  
28  
29 463 2 Stevens GA, Finucane MM, De-Regil LM, *et al.* Global, regional, and national trends in  
30  
31 464 haemoglobin concentration and prevalence of total and severe anaemia in children and  
32  
33 465 pregnant and non-pregnant women for 1995-2011: A systematic analysis of population-  
34  
35 466 representative data. *Lancet Glob Heal* 2013;**1**:16–25. doi:10.1016/S2214-109X(13)70001-  
36  
37 467 9  
38  
39  
40  
41 468 3 Kassebaum NJ, Jasrasaria R, Naghavi M, *et al.* A systematic analysis of global anemia  
42  
43 469 burden from 1990 to 2010. *Blood* 2014;**123**:615–24. doi:10.1182/blood-2013-06-508325  
44  
45  
46  
47 470 4 Sunuwar DR, Singh DR, Chaudhary NK, *et al.* Prevalence and factors associated with  
48  
49 471 anemia among women of reproductive age in seven South and Southeast Asian countries:  
50  
51 472 Evidence from nationally representative surveys. *PLoS One* 2020;**15**:e0236449.  
52  
53 473 doi:10.1371/journal.pone.0236449  
54  
55  
56  
57  
58  
59  
60

- 1  
2  
3 474 5 World Health Organization (WHO). Global Health Observatory Data Repository/World  
4  
5 475 Health Statistics. 2016.<http://apps.who.int/gho/data/node.main.1lang=en>  
6  
7  
8 476 6 Akseer N, Kamali M, Arifeen SE, *et al*. Progress in maternal and child health: How has  
9  
10 477 South Asia fared? *BMJ* 2017;**357**. doi:10.1136/bmj.j1608  
11  
12  
13 478 7 WHO. Global nutrition targets 2025: anaemia policy brief (WHO/NMH/NHD/14.4).  
14  
15 479 2014;:1–  
16  
17 480 7.[http://www.who.int/iris/bitstream/10665/148556/1/WHO\\_NMH\\_NHD\\_14.4\\_eng.pdf](http://www.who.int/iris/bitstream/10665/148556/1/WHO_NMH_NHD_14.4_eng.pdf)  
18  
19  
20  
21 481 8 Harding KL, Aguayo VM, Webb P. Hidden hunger in South Asia: A review of recent  
22  
23 482 trends and persistent challenges. *Public Health Nutr* 2018;**21**:785–95.  
24  
25 483 doi:10.1017/S1368980017003202  
26  
27  
28  
29 484 9 National Planning Committee Government of Nepal. Multi-Sector Nutrition Plan (2018-  
30  
31 485 2022). 2017. [http://www.nnfsp.gov.np/PublicationFiles/1588f12e-7c45-4506-829d-](http://www.nnfsp.gov.np/PublicationFiles/1588f12e-7c45-4506-829d-8fe162da97e5.pdf)  
32  
33 486 [8fe162da97e5.pdf](http://www.nnfsp.gov.np/PublicationFiles/1588f12e-7c45-4506-829d-8fe162da97e5.pdf)  
34  
35  
36 487 10 United Nations. THE 17 GOALS | Sustainable Development.  
37  
38 488 2015.<https://sdgs.un.org/goals> (accessed 16 Jan 2021).  
39  
40  
41 489 11 Ministry of Health and Population, New ERA, The DHS Program ICF. Nepal  
42  
43 490 Demographic and Health Survey 2011. 2011;:163–71. doi:10.1007/978-94-6091-391-  
44  
45 491 4\_15  
46  
47  
48  
49 492 12 Ministry of Health, New ERA, The DHS Program ICF (2017). Nepal Demographic and  
50  
51 493 Health Survey. 2016.<https://www.dhsprogram.com/pubs/pdf/FR336/FR336.pdf> (accessed  
52  
53 494 11 Jul 2019).  
54  
55  
56  
57  
58  
59  
60



- 1  
2  
3 495 13 World Health Organization. Department of Nutrition for Health and Development. Iron  
4  
5 496 deficiency anaemia: assessment, prevention and control: a guide for programme managers.  
6  
7  
8 497 Geneva: World Health Organization. 2001;:1–114. doi:10.1136/pgmj.2009.089987  
9  
10  
11 498 14 Scholl TO, Hediger ML, Fischer RL, *et al.* Anemia vs iron deficiency: increased risk of  
12  
13 499 preterm delivery in a prospective study. *Am J Clin Nutr* 1992;**55** (5):985–8.  
14  
15 500 doi:10.1093/ajcn/55.5.985  
16  
17  
18 501 15 Szerafin L, Jakó J. Anemia in Pregnancy: Characteristics in Szabolcs-Szatmár-Bereg  
19  
20 502 County, Hungary. *Orv Hetil* 2010;**151**:1347–52. doi:10.1556/OH.2010.28887  
21  
22  
23 503 16 Rasmussen KM. Is There a Causal Relationship between Iron Deficiency or Iron-  
24  
25 504 Deficiency Anemia and Weight at Birth, Length of Gestation and Perinatal Mortality? *J*  
26  
27 505 *Nutr* Published Online First: 2001. [https://academic.oup.com/jn/article-](https://academic.oup.com/jn/article-abstract/131/2/590S/4686836)  
28  
29 506 [abstract/131/2/590S/4686836](https://academic.oup.com/jn/article-abstract/131/2/590S/4686836) (accessed 10 Jun 2020).  
30  
31  
32  
33 507 17 Balarajan Y, Ramakrishnan U, Özaltın E, *et al.* Anaemia in low-income and middle-  
34  
35 508 income countries. *Lancet* 2011;**378**:2123–35. doi:10.1016/S0140-6736(10)62304-5  
36  
37  
38  
39 509 18 Rabbani G, Saw A, Sayem A, *et al.* Differentials in the prevalence of anemia among non-  
40  
41 510 pregnant , ever-married women in Bangladesh : multilevel logistic regression analysis of  
42  
43 511 data from the 2011 Bangladesh Demographic and Health Survey. *BMC Womens Health*  
44  
45 512 2015;:4–11. doi:10.1186/s12905-015-0211-4  
46  
47  
48  
49 513 19 Baradwan S, Alyousef A, Turkistan A. Associations between iron deficiency anemia and  
50  
51 514 clinical features among pregnant women: A prospective cohort study. *J Blood Med*  
52  
53 515 2018;**9**:163–9. doi:10.2147/JBM.S175267  
54  
55  
56  
57  
58  
59  
60

- 1  
2  
3 516 20 Sanghvi TG, Harvey PWJ, Wainwright E. Maternal iron-folic acid supplementation  
4  
5 517 programs: Evidence of impact and implementation. *Food Nutr Bull* 2010;**31**.  
6  
7 518 doi:10.1177/15648265100312s202  
9  
10 519 21 Galloway R, Dusch E, Elder L, *et al*. Women's perceptions of iron deficiency and anemia  
12  
13 520 prevention and control in eight developing countries. *Soc Sci Med* 2002;**55**:529–44.  
14  
15 521 doi:10.1016/S0277-9536(01)00185-X  
16  
17  
18 522 22 McLean E, Cogswell M, Egli I, *et al*. Worldwide prevalence of anaemia, WHO Vitamin  
19  
20 523 and Mineral Nutrition Information System, 1993-2005. *Public Health Nutr* 2009;**12**:444–  
22  
23 524 54. doi:10.1017/S1368980008002401  
24  
25  
26 525 23 Nepal National Planning Commission. Nepal Human Development Report 2014: Beyond  
27  
28 526 geography. 2014. [https://www.npc.gov.np/images/category/NHDR\\_Report\\_20141.pdf](https://www.npc.gov.np/images/category/NHDR_Report_20141.pdf)  
29  
30  
31 527 24 Nepal Development Research Institute and UNFPA. Situational Assessment for Improved  
32  
33 528 Gender Based Violence Prevention and Response in Selected Districts of Nepal, Lalitpur,  
34  
35 529 Nepal; 2017.  
36  
37  
38 530 25 Adhikari B, Mishra SR. Urgent need for reform in Nepal's medical education. *Lancet*  
39  
40 531 2016;**388**:2739–40. doi:10.1016/S0140-6736(16)32423-0  
42  
43  
44 532 26 Parajuli RP, Umezaki M, Watanabe C. Diet among people in the Terai region of Nepal, an  
45  
46 533 area of micronutrient deficiency. *J Biosoc Sci* 2012;**44**:401–15.  
47  
48 534 doi:10.1017/S0021932012000065  
49  
50  
51 535 27 Campbell RK, Talegawkar SA, Christian P, *et al*. Seasonal dietary intakes and  
52  
53 536 socioeconomic status among women in the terai of Nepal. *J Heal Popul Nutr*

- 1  
2  
3 537 2014;**32**:198–216. doi:10.3329/jhpn.v32i2.2615  
4  
5  
6 538 28 Sunuwar DR, Sangroula RK, Shakya NS, *et al.* Effect of nutrition education on  
7  
8 539 hemoglobin level in pregnant women: A quasi-experimental study. *PLoS One* 2019;**14**.  
9  
10 540 doi:10.1371/journal.pone.0213982  
11  
12  
13 541 29 Sunuwar DR, Singh DR, Pradhan PMS. Prevalence and factors associated with double and  
14  
15 542 triple burden of malnutrition among mothers and children in Nepal: evidence from 2016  
16  
17 543 Nepal demographic and health survey. *BMC Public Health* 2020;**20**:405.  
18  
19 544 doi:10.1186/s12889-020-8356-y  
20  
21  
22  
23 545 30 Dreyfuss ML, Stoltzfus RJ, Shrestha JB, *et al.* Hookworms, Malaria and Vitamin A  
24  
25 546 Deficiency Contribute to Anemia and Iron Deficiency among Pregnant Women in the  
26  
27 547 Plains of Nepal. *J Nutr* 2000;**130**:2527–36. doi:10.1093/jn/130.10.2527  
28  
29  
30  
31 548 31 Rijal KR, Adhikari B, Ghimire P, *et al.* Epidemiology of Plasmodium vivax malaria  
32  
33 549 infection in Nepal. *Am J Trop Med Hyg* 2018;**99**:680–7. doi:10.4269/ajtmh.18-0373  
34  
35  
36 550 32 Rijal KR, Adhikari B, Adhikari N, *et al.* Micro-stratification of malaria risk in Nepal:  
37  
38 551 Implications for malaria control and elimination. *Trop Med Health* 2019;**47**:1–12.  
39  
40 552 doi:10.1186/s41182-019-0148-7  
41  
42  
43  
44 553 33 Pokhrel D, Bhandari BS, Viraraghavan T. Arsenic contamination of groundwater in the  
45  
46 554 Terai region of Nepal: An overview of health concerns and treatment options. *Environ.*  
47  
48 555 *Int.* 2009;**35**:157–61. doi:10.1016/j.envint.2008.06.003  
49  
50  
51 556 34 Singh DR, Ghimire S, Upadhayay SR, *et al.* Food insecurity and dietary diversity among  
52  
53 557 lactating mothers in the urban municipality in the mountains of Nepal. *PLoS One*

- 1  
2  
3 558 2020;**15**:0–17. doi:10.1371/journal.pone.0227873  
4  
5  
6 559 35 Gautam S, Min H, Kim H, *et al*. Determining factors for the prevalence of anemia in  
7  
8 560 women of reproductive age in Nepal: Evidence from recent national survey data. *PLoS*  
9  
10 561 *One* 2019;**14**:e0218288. doi:10.1371/journal.pone.0218288  
11  
12  
13 562 36 Rai A, Khan MN, Thapa S. Trends and determinants of anaemia in women of Nepal: a  
14  
15 563 multilevel analysis. *Matern Child Nutr* 2020;**16**:1–14. doi:10.1111/mcn.13044  
16  
17  
18 564 37 Harding KL, Aguayo VM, Namirembe G, *et al*. Determinants of anemia among women  
19  
20 565 and children in Nepal and Pakistan: An analysis of recent national survey data. *Matern*  
21  
22 566 *Child Nutr* 2018;**14**:1–13. doi:10.1111/mcn.12478  
23  
24  
25  
26 567 38 Rose LE. Nepal | History, Population, Flag, Language, Map, & Facts | Britannica.  
27  
28 568 <https://www.britannica.com/place/Nepal> (accessed 18 Jan 2021).  
29  
30  
31 569 39 Kibret KT, Chojenta C, D’Arcy E, *et al*. Spatial distribution and determinant factors of  
32  
33 570 anaemia among women of reproductive age in Ethiopia: A multilevel and spatial analysis.  
34  
35 571 *BMJ Open* 2019;**9**:1–14. doi:10.1136/bmjopen-2018-027276  
36  
37  
38  
39 572 40 World Health Organization. Haemoglobin concentrations for the diagnosis of anaemia and  
40  
41 573 assessment of severity. Geneva: World Health Organization, 2011.  
42  
43 574 <http://www.who.int/vmnis/indicators/haemoglobin.pdf> (accessed 27 Mar 2018).  
44  
45  
46  
47 575 41 FAO F. Minimum dietary diversity for women: a guide for measurement. *Rome FAO*  
48  
49 576 2016.  
50  
51  
52 577 42 Ntenda PAM, Nkoka O, Bass P, *et al*. Maternal anemia is a potential risk factor for  
53  
54 578 anemia in children aged 6-59 months in Southern Africa: A multilevel analysis. *BMC*

- 1  
2  
3 579 *Public Health* 2018;**18**:1–13. doi:10.1186/s12889-018-5568-5  
4  
5  
6 580 43 Ntenda PAM, Chuang KY, Tiruneh FN, *et al.* Multilevel analysis of the effects of  
7  
8 581 individual and community-level factors on childhood anemia, severe anemia, and  
9  
10 582 hemoglobin concentration in Malawi. *J Trop Pediatr* 2018;**64**:267–78.  
11  
12 doi:10.1093/tropej/fmx059  
13 583  
14  
15  
16 584 44 World Health Organization (WHO), United Nations Children’s Fund (UNICEF). WHO  
17  
18 585 and UNICEF Joint Monitoring Programme (JMP) for water supply and sanitation: types of  
19  
20 586 drinking-water sources and sanitation. Geneva, Switzerland. Published Online First:  
21  
22 2015. <http://www.wssinfo.org/definitions-methods/%0Awatsan-categories/>  
23 587  
24  
25  
26 588 45 Merlo J, Chaix B, Ohlsson H, *et al.* A brief conceptual tutorial of multilevel analysis in  
27  
28 589 social epidemiology: Using measures of clustering in multilevel logistic regression to  
29  
30 590 investigate contextual phenomena. *J Epidemiol Community Health* 2006;**60**:290–7.  
31  
32 591 doi:10.1136/jech.2004.029454  
33  
34  
35  
36 592 46 Joseph F. Hair J, Black WC, Babin BJ, *et al.* Multivariate Data Analysis, 7th Edition |  
37  
38 593 Pearson. [https://www.pearson.com/us/higher-education/program/Hair-Multivariate-Data-](https://www.pearson.com/us/higher-education/program/Hair-Multivariate-Data-Analysis-7th-Edition/PGM263675.html)  
39  
40 594 [Analysis-7th-Edition/PGM263675.html](https://www.pearson.com/us/higher-education/program/Hair-Multivariate-Data-Analysis-7th-Edition/PGM263675.html) (accessed 3 Apr 2020).  
41  
42  
43 595 47 Merlo J, Chaix B, Yang M, *et al.* A brief conceptual tutorial on multilevel analysis in  
44  
45 596 social epidemiology: Interpreting neighbourhood differences and the effect of  
46  
47 597 neighbourhood characteristics on individual health. *J Epidemiol Community Health*  
48  
49 2005;**59**:1022–8. doi:10.1136/jech.2004.028035  
50 598  
51  
52  
53 599 48 Guo G, Zhao H. Multilevel Modeling for Binary Data. *Annu Rev Sociol* 2000;**26**:441–62.  
54  
55 600 doi:10.1146/annurev.soc.26.1.441  
56  
57  
58  
59  
60

- 1  
2  
3 601 49 Diez Roux A V. A glossary for multilevel analysis. *J Epidemiol Community Health*  
4  
5 602 2002;**56**:588–94. doi:10.1136/jech.56.8.588  
6  
7  
8 603 50 Government of Nepal, Survey Department. Ministry of Land Management, Cooperatives and  
9  
10 604 Poverty Alleviation. 2020.<http://dos.gov.np/>  
11  
12  
13 605 51 North American Cartographic Information Society (NACIS) Collaborators. Natural Earth.  
14  
15 606 <http://www.naturalearthdata.com/> (accessed 17 Jun 2020).  
16  
17  
18 607 52 Ohsawa M, Tanno K, Okamura T, *et al*. Standardized prevalence ratios for atrial  
19  
20 608 fibrillation in adult dialysis patients in Japan. *J Epidemiol* 2016;**26**:272–6.  
21  
22 609 doi:10.2188/jea.JE20150077  
23  
24  
25  
26 610 53 Anselin L, Sridharan S, Gholston S. Using exploratory spatial data analysis to leverage  
27  
28 611 social indicator databases: The discovery of interesting patterns. *Soc Indic Res*  
29  
30 612 2007;**82**:287–309. doi:10.1007/s11205-006-9034-x  
31  
32  
33  
34 613 54 Liyew AM, Kebede SA, Agegnehu CD, *et al*. Spatiotemporal patterns of anemia among  
35  
36 614 lactating mothers in ethiopia using data from ethiopian demographic and health surveys  
37  
38 615 (2005, 2011 and 2016). *PLoS One* 2020;**15**:1–17. doi:10.1371/journal.pone.0237147  
39  
40  
41  
42 616 55 Ord JK, Getis A. Local Spatial Autocorrelation Statistics: Distributional Issues and an  
43  
44 617 Application. *Geogr Anal* 1995;**27**:286–306. doi:10.1111/j.1538-4632.1995.tb00912.x  
45  
46  
47 618 56 Demographic and Health Surveys. The DHS Program.  
48  
49 619 <https://www.dhsprogram.com/data/available-datasets.cfm> (accessed 20 Jun 2020).  
50  
51  
52 620 57 Ford ND, Bichha RP, Parajuli KR, *et al*. Factors associated with anaemia in a nationally  
53  
54 621 representative sample of nonpregnant women of reproductive age in Nepal. *Matern Child*

- 1  
2  
3 622 *Nutr* 2020;:1–11. doi:10.1111/mcn.12953  
4  
5  
6 623 58 Gautam N, Kakchapati S, Shrestha S, *et al.* Patterns and trends of malaria in 25 risk  
7  
8 624 districts of nepal from 2001 to 2017. *Clin Exp Vaccine Res* 2019;**8**:77–85.  
9  
10 625 doi:10.7774/cevr.2019.8.1.77  
11  
12  
13 626 59 Mahmud H, Föller M, Lang F. Arsenic-induced suicidal erythrocyte death. *Arch Toxicol*  
14  
15 627 2009;**83**:107–13. doi:10.1007/s00204-008-0338-2  
16  
17  
18 628 60 Hopenhayn C, Bush HM, Bingcang A, *et al.* Association between arsenic exposure from  
19  
20 629 drinking water and anemia during pregnancy. *J Occup Environ Med* 2006;**48**:635–43.  
21  
22 630 doi:10.1097/01.jom.0000205457.44750.9f  
23  
24  
25  
26 631 61 Heck JE, Chen Y, Grann VR, *et al.* Arsenic Exposure and Anemia in Bangladesh: A  
27  
28 632 Population-Based Study. *J Occup Environ Med* 2008;**50**:80–7.  
29  
30 633 doi:10.1097/JOM.0b013e31815ae9d4  
31  
32  
33  
34 634 62 Ghimire P, Singh N, Ortega L, *et al.* Glucose-6-phosphate dehydrogenase deficiency in  
35  
36 635 people living in malaria endemic districts of Nepal. *Malar J* 2017;**16**:214.  
37  
38 636 doi:10.1186/s12936-017-1864-2  
39  
40  
41  
42 637 63 Gautam N, Gaire B, Manandhar T, *et al.* Glucose 6 phosphate dehydrogenase deficiency  
43  
44 638 and hemoglobinopathy in South Western Region Nepal: A boon or burden. *BMC Res*  
45  
46 639 *Notes* 2019;**12**:1–6. doi:10.1186/s13104-019-4762-6  
47  
48  
49 640 64 Balarajan YS, Fawzi WW, Subramanian S V. Changing patterns of social inequalities in  
50  
51 641 anaemia among women in india: Cross-sectional study using nationally representative  
52  
53 642 data. *BMJ Open* 2013;**3**. doi:10.1136/bmjopen-2012-002233  
54  
55  
56  
57  
58  
59  
60

- 1  
2  
3 643 65 Wilunda C, Massawe S, Jackson C. Determinants of moderate-to-severe anaemia among  
4  
5 644 women of reproductive age in Tanzania: Analysis of data from the 2010 Tanzania  
6  
7 645 demographic and health survey. *Trop Med Int Heal* 2013;**18**:1488–97.  
8  
9 646 doi:10.1111/tmi.12199  
10  
11  
12  
13 647 66 Hakizimana D, Nisingizwe MP, Logan J, *et al*. Identifying risk factors of anemia among  
14  
15 648 women of reproductive age in Rwanda – a cross-sectional study using secondary data  
16  
17 649 from the Rwanda demographic and health survey 2014 / 2015. *BMC Public Health*  
18  
19 650 2019;:1–11. <https://www.ncbi.nlm.nih.gov/pubmed/31829161>  
20  
21  
22  
23 651 67 Lover AA, Hartman M, Chia KS, *et al*. Demographic and Spatial Predictors of Anemia in  
24  
25 652 Women of Reproductive Age in Timor-Leste : Implications for Health Program  
26  
27 653 Prioritization. *PLoS One* 2014;**9**. doi:10.1371/journal.pone.0091252  
28  
29  
30 654 68 Md. Kamruzzaman, Md. Golam Rabbani<sup>1</sup>, Aik Saw MAS and MGH. Differences in early  
31  
32 655 postnatal morbidity risk by pattern of fetal growth in Argentina. *Paediatr Perinat*  
33  
34 656 *Epidemiol*;**5**:263–75.  
35  
36  
37  
38 657 69 Adhikari RK. Food utilization practices, beliefs and taboos in Nepal—an overview. United  
39  
40 658 States Agency for International Development–Global Health Technical Report. 2010.  
41  
42 659 <http://ghpro.dexisonline.com/sites/default/files/resources/legacy/sites/default/files/1.367>  
43  
44 660 Nepal Nutrition Overview Rpt 8\_16\_10\_508.pdf (accessed 19 Jan 2020).  
45  
46  
47  
48 661 70 Osei A, Pandey P, Nielsen J, *et al*. Combining Home Garden, Poultry, and Nutrition  
49  
50 662 Education Program Targeted to Families With Young Children Improved Anemia Among  
51  
52 663 Children and Anemia and Underweight Among Nonpregnant Women in Nepal. *Food Nutr*  
53  
54 664 *Bull* 2017;**38**:49–64. doi:10.1177/0379572116676427  
55  
56  
57  
58  
59  
60



- 1  
2  
3 665 71 Cunningham K, Singh A, Pandey Rana P, *et al*. Suaahara in Nepal: An at-scale, multi-  
4  
5 666 sectoral nutrition program influences knowledge and practices while enhancing equity.  
6  
7 667 *Matern Child Nutr* 2017;**13**. doi:10.1111/mcn.12415  
8  
9  
10  
11 668 72 The World Bank. Nepal Sunaula Hazar Din Community Action for Nutrition Project  
12  
13 669 Endline Report. 2018.  
14  
15 670 <http://documents1.worldbank.org/curated/en/176611539110943044/pdf/SHD-Endline->  
16  
17 671 [Report.pdf](http://documents1.worldbank.org/curated/en/176611539110943044/pdf/SHD-Endline-Report.pdf) (accessed 14 Jan 2021).  
18  
19  
20  
21 672 73 Kandala NI, Pallikadavath S, Amos Channon A, *et al*. A multilevel approach to correlates  
22  
23 673 of anaemia in women in the Democratic Republic of Congo: findings from a nationally  
24  
25 674 representative survey. *Eur J Clin Nutr* 2020;**74**:720–31. doi:10.1038/s41430-019-0524-8  
26  
27  
28 675 74 Ministry of Health and Population, New ERA, UNICEF, EU, USAID &, CDC. Nepal  
29  
30 676 National Micronutrient Status Survey Report 2016 | UNICEF Nepal.  
31  
32 2018.[https://www.unicef.org/nepal/reports/nepal-national-micronutrient-status-survey-](https://www.unicef.org/nepal/reports/nepal-national-micronutrient-status-survey-report-2016)  
33 677 [report-2016](https://www.unicef.org/nepal/reports/nepal-national-micronutrient-status-survey-report-2016) (accessed 14 Jan 2021).  
34  
35 678  
36  
37  
38 679 75 Gebremedhin S, Enquesselassie F. Correlates of anemia among women of reproductive age  
39  
40 680 in Ethiopia: Evidence from Ethiopian DHS 2005. *Ethiop J Heal Dev* 2011;**25**:22–30.  
41  
42 681 doi:10.4314/ejhd.v25i1.69842  
43  
44  
45 682 76 Miller L, Hughes JP. Continuous combination oral contraceptive pills to eliminate  
46  
47 683 withdrawal bleeding: A randomized trial. *Obstet Gynecol* 2003;**101**:653–61.  
48  
49 684 doi:10.1016/S0029-7844(03)00014-0  
50  
51  
52  
53 685 77 Bellizzi S, Ali MM. Effect of oral contraception on anemia in 12 low- and middle-income  
54  
55 686 countries. *Contraception* 2018;**97**:236–42. doi:10.1016/j.contraception.2017.11.001  
56  
57  
58  
59  
60

- 1  
2  
3 687 78 Haile ZT, Kingori C, Teweldeberhan AK, *et al.* The relationship between history of  
4  
5 688 hormonal contraceptive use and iron status among women in Tanzania: A population-  
6  
7 689 based study. *Sex Reprod Healthc* 2017;**13**:97–102. doi:10.1016/j.srhc.2017.07.003  
8  
9  
10 690 79 Chandyo RK, Strand TA, Ulvik RJ, *et al.* Prevalence of iron deficiency and anemia among  
11  
12 691 healthy women of reproductive age in Bhaktapur, Nepal. *Eur J Clin Nutr* 2007;**61**:262–9.  
13  
14 692 doi:10.1038/sj.ejcn.1602508  
15  
16  
17  
18 693 80 Jahanian Sadatmahalleh S, Ziaei S, Kazemnejad A, *et al.* Menstrual pattern following  
19  
20 694 tubal ligation: A historical cohort study. *Int J Fertil Steril* 2016;**9**:477–82.  
21  
22 695 doi:10.22074/ijfs.2015.4605  
23  
24  
25  
26 696 81 Rai A, Gurung S, Thapa S, *et al.* Correlates and inequality of underweight and overweight  
27  
28 697 among women of reproductive age: Evidence from the 2016 Nepal Demographic Health  
29  
30 698 Survey. *PLoS One* 2019;**14**:1–16. doi:10.1371/journal.pone.0216644  
31  
32

33 699 **Figure 1 Flow chart for sample size selection**

34  
35  
36 700 **Figure 2 Study area map and observed anaemia prevalence among women of reproductive**  
37  
38 701 **age for the NDHS survey clusters**

39  
40 702 **Table 1 Socio-demographic characteristics and prevalence of anaemia among women of**  
41  
42 703 **reproductive age by determining factors (n=6,414)**

43 704 **Table 2 Multilevel mixed-effects logistic regression for individual and community-level**  
44  
45 705 **factors affecting anaemia among women of reproductive age (n=6,414)**

46 706 **Figure 3 (a) Prevalence of anaemia among women of reproductive age across provinces.**

47  
48 707 **3 (b) Prevalence of anaemia among women of reproductive age across districts**  
49  
50  
51  
52  
53  
54  
55  
56  
57

708 **Figure 4 (a) Standardized prevalence ratio of anaemia among women of reproductive age**  
 709 **across provinces. 4 (b) Standardized prevalence ratio of anaemia among women of**  
 710 **reproductive age across districts (standardized to the national mean prevalence of 41%)**  
 711 **Figure 5 Spatial pattern and distribution of hot and cold spots of anaemia among women of**  
 712 **reproductive age at cluster level in Nepal**

713  
 714 **Table 1 Socio-demographic characteristics and prevalence of anaemia among women of**  
 715 **reproductive age by determining factors (n=6,414)**

| Variables                               | Total sample<br>Frequency (%) | Anaemia status % (95% CI) |                     | p-value <sup>1,2</sup> |
|-----------------------------------------|-------------------------------|---------------------------|---------------------|------------------------|
|                                         |                               | Not anaemic               | Anaemic             |                        |
| <b>Overall prevalence</b>               | 6414                          | 59.3<br>(57.0-61.4)       | 40.7<br>(38.5-42.9) |                        |
| <b>Severe anaemia</b>                   | 17 (0.3)                      |                           |                     |                        |
| <b>Moderate anaemia</b>                 | 450 (7)                       |                           |                     |                        |
| <b>Mild anaemia</b>                     | 2147 (33.4)                   |                           |                     |                        |
| <b>Hemoglobin level, mean<br/>(±SD)</b> | 12.3 ± 1.5                    | 13.2 ± 0.9                | 10.8 ± 1.1          | <0.001*                |
| <b>Individual-level factors</b>         |                               |                           |                     |                        |
| <b>Age in years, mean (±SD)</b>         | 29.1 ± 9.7                    | 29.5 ± 9.7                | 28.4 ± 9.5          | <0.001*                |
| <b>Age</b>                              |                               |                           |                     | <0.001*                |
| 15-24                                   | 2443 (38.1)                   | 56.4<br>(53.4-59.3)       | 43.6<br>(40.6-46.5) |                        |
| 25-34                                   | 1971 (30.7)                   | 58.7<br>(55.7-61.5)       | 41.3<br>(38.4-44.2) |                        |
| ≥35                                     | 2000 (31.1)                   | 63.2<br>(60.3-66)         | 36.8<br>(34-39.6)   |                        |
| <b>Education</b>                        |                               |                           |                     | 0.086                  |
| No education                            | 2144 (33.4)                   | 58.4<br>(55-61.7)         | 41.6<br>(38.2-44.9) |                        |
| Primary                                 | 1069 (16.6)                   | 61.5<br>(57.1-65.7)       | 38.5<br>(34.2-42.8) |                        |
| Secondary                               | 2277 (35.5)                   | 57.3<br>(54.2-60.3)       | 42.7<br>(39.6-45.7) |                        |

|                                       |              |                     |                     |         |
|---------------------------------------|--------------|---------------------|---------------------|---------|
| Higher                                | 924 (14.4)   | 63.3<br>(58.7-67.6) | 36.7<br>(32.3-41.3) |         |
| <b>Occupation</b>                     |              |                     |                     | 0.084   |
| Not working                           | 2096 (32.6)  | 57.1<br>(53.7-60.3) | 42.9<br>(39.6-46.2) |         |
| Working                               | 4318 (67.3)  | 60.3<br>(57.7-62.7) | 39.7<br>(37.2-42.2) |         |
| <b>Wealth index</b>                   |              |                     |                     | <0.001* |
| Poorest                               | 1093 (17)    | 67.7<br>(63.8-71.2) | 32.3<br>(28.7-36.1) |         |
| Poorer                                | 1225 (19.1)  | 58.5<br>(54.8-62.1) | 41.5<br>(37.9-45.2) |         |
| Middle                                | 1317 (20.5)  | 51.1<br>(47.2-54.8) | 48.9<br>(45.1-52.8) |         |
| Richer                                | 1441 (22.4)  | 56.6<br>(51.8-61.1) | 43.4<br>(38.8-48.1) |         |
| Richest                               | 1338 (20.8)  | 64.1<br>(59.9-67.9) | 35.9<br>(32.1-40.1) |         |
| <b>BMI, mean (<math>\pm</math>SD)</b> | 22 $\pm$ 3.8 | 22.4 $\pm$ 3.9      | 21.4 $\pm$ 3.6      | <0.001* |
| <b>BMI (n=6411)</b>                   |              |                     |                     | <0.001* |
| Normal                                | 3925 (61.2)  | 57.4<br>(54.4-60.2) | 42.6<br>(39.7-45.5) |         |
| Underweight                           | 1077 (16.8)  | 51.9<br>(48.3-55.4) | 48.1<br>(44.6-51.6) |         |
| Overweight/obesity                    | 1408 (21.9)  | 69.9<br>(66.5-73.2) | 30.1<br>(26.7-33.4) |         |
| <b>Currently pregnant</b>             |              |                     |                     | 0.081   |
| No                                    | 6124 (95.4)  | 59.5<br>(57.3-61.6) | 40.5<br>(38.3-42.7) |         |
| Yes                                   | 290 (4.5)    | 53.9<br>(47.2-60.5) | 46.1<br>(39.4-52.7) |         |
| <b>Currently breastfeeding</b>        |              |                     |                     | <0.001* |
| No                                    | 4988 (77.7)  | 60.7<br>(58.4-62.9) | 39.3<br>(37.1-41.6) |         |
| Yes                                   | 1426 (22.2)  | 54.2<br>(50.6-57.7) | 45.8<br>(42.2-49.3) |         |
| <b>Total children ever born</b>       |              |                     |                     | 0.612   |
| No child                              | 1842 (28.7)  | 58.2<br>(54.5-61.7) | 41.8<br>(38.2-45.4) |         |
| 1-3 child                             | 3386 (52.8)  | 59.9                | 40.1                |         |

|                                        |             |                     |                     |         |
|----------------------------------------|-------------|---------------------|---------------------|---------|
|                                        |             | (57.4-62.2)         | (37.7-42.5)         |         |
| 4+ child                               | 1186 (18.4) | 58.9<br>(55.1-62.7) | 41.1<br>(37.2-44.8) |         |
| <b>Current contraceptive use</b>       |             |                     |                     | <0.001* |
| Not using                              | 3832 (59.7) | 57.6<br>(54.9-60.1) | 42.4<br>(39.8-45.1) |         |
| Hormonal                               | 905 (14.1)  | 70.5<br>(66.5-74.2) | 29.5<br>(25.7-33.4) |         |
| Female sterilization                   | 730 (11.4)  | 46.3<br>(41.8-50.8) | 53.7<br>(49.1-58.2) |         |
| Male contraception                     | 268 (4.2)   | 71.7<br>(61.9-79.8) | 28.3<br>(20.1-38.1) |         |
| Traditional                            | 679 (10.6)  | 62.4<br>(58.1-61.4) | 37.6<br>(33.3-41.9) |         |
| <b>Cigarette/smoking</b>               |             |                     |                     | <0.001* |
| Smoking                                | 573 (8.9)   | 71.1<br>(66.5-75.2) | 28.9<br>(24.7-33.4) |         |
| Not smoking                            | 5841 (91.1) | 58.1<br>(55.8-60.3) | 41.9<br>(39.7-44.1) |         |
| <b>MDD-W (n=1131)</b>                  |             |                     |                     | 0.025*  |
| Not diverse                            | 558 (49.3)  | 49<br>(43.8-54.1)   | 51<br>(45.8-56.1)   |         |
| Diverse                                | 573 (50.6)  | 56.8<br>(51.7-61.7) | 43.2<br>(38.2-48.2) |         |
| <b>Mosquitoes bed net for sleeping</b> |             |                     |                     | 0.024*  |
| No                                     | 1412 (22.1) | 68.9<br>(65.6-72.1) | 31.1<br>(27.9-34.3) |         |
| Yes                                    | 5002 (77.1) | 56.5<br>(53.9-59)   | 43.5<br>(41-46.1)   |         |
| <b>Place of residence</b>              |             |                     |                     | 0.202   |
| Urban                                  | 4029 (68.8) | 60.4<br>(57.5-63.1) | 39.6<br>(36.8-42.4) |         |
| Rural                                  | 2385 (37.1) | 57.3<br>(53.6-60.9) | 42.7<br>(39.1-46.3) |         |
| <b>Province</b>                        |             |                     |                     | <0.001* |
| Province-1                             | 1073 (16.7) | 56.7<br>(51.2-62.1) | 43.3<br>(37.9-48.7) |         |
| Province-2                             | 1285 (20)   | 42.2                | 57.7                |         |

|                                                                                                                           |             |                     |                     |         |
|---------------------------------------------------------------------------------------------------------------------------|-------------|---------------------|---------------------|---------|
|                                                                                                                           |             | (37.3-47.2)         | (52.7-62.6)         |         |
| Bagmati                                                                                                                   | 1408 (21.9) | 70.9<br>(66.4-75.1) | 29.1<br>(24.8-33.5) |         |
| Gandaki                                                                                                                   | 627 (9.7)   | 71.9<br>(66.3-76.9) | 28.1<br>(23.1-33.6) |         |
| Province-5                                                                                                                | 1086 (16.9) | 56.5<br>(52.5-60.5) | 43.5<br>(39.4-47.5) |         |
| Karnali                                                                                                                   | 369 (5.7)   | 65.1<br>(59.7-70.1) | 34.9<br>(29.9-40.2) |         |
| Sudurpaschim                                                                                                              | 566 (8.8)   | 60.7<br>(54.7-66.3) | 39.3<br>(33.6-45.2) |         |
| <b>Community female education<sup>a</sup></b>                                                                             |             |                     |                     | <0.001* |
| Low                                                                                                                       | 2936 (45.7) | 52.1<br>(49.1-55.2) | 47.9<br>(44.8-50.9) |         |
| High                                                                                                                      | 3478 (54.2) | 65.3<br>(62.3-68.1) | 34.7<br>(31.9-37.6) |         |
| <b>Community female wealth index<sup>b</sup></b>                                                                          |             |                     |                     | <0.001* |
| Low                                                                                                                       | 4107 (64)   | 55.7<br>(52.6-58.7) | 44.3<br>(41.2-47.3) |         |
| High                                                                                                                      | 2307 (35.9) | 65.5<br>(62.1-68.8) | 34.5<br>(31.1-37.8) |         |
| <b>Source of drinking water (n=6084)</b>                                                                                  |             |                     |                     | 0.004*  |
| Improved                                                                                                                  | 5537 (91)   | 58.7<br>(56.3-61.1) | 41.3<br>(38.9-43.6) |         |
| Not improved                                                                                                              | 547 (8.9)   | 66.3<br>(61.4-70.8) | 33.7<br>(29.2-38.5) |         |
| <b>Type of toilet facility (n=6084)</b>                                                                                   |             |                     |                     | <0.001* |
| Improved                                                                                                                  | 5117 (84.1) | 61.5<br>(59.3-63.6) | 38.5<br>(36.3-40.7) |         |
| Not improved                                                                                                              | 967 (16)    | 48.5<br>(43.1-53.9) | 51.5<br>(46.1-56.8) |         |
| Frequency and percentage (%) are weighted                                                                                 |             |                     |                     |         |
| <sup>1, 2</sup> denotes Pearson Chi-Square test for categorical variables and independent t-test for continuous variables |             |                     |                     |         |
| *denotes statistically significant at p<0.05                                                                              |             |                     |                     |         |
| <sup>a</sup> mean percent of households wealth quintiles categorized richer and richest and above                         |             |                     |                     |         |

<sup>b</sup>mean percent of women with primary education level and above  
 BMI: Body Mass Index  
 MDD-W: Minimum Dietary Diversity for Women

716

717 **Table 2 Multilevel mixed-effects logistic regression analysis for individual and community-**  
 718 **level factors affecting anaemia among women of reproductive age (n=6,414)**

| Variables                       | Model 1<br>Empty model | Model 2<br>Individual-level<br>factors | Model 3<br>community-level<br>factors | Model 4<br>Individual and<br>community-level<br>factors |
|---------------------------------|------------------------|----------------------------------------|---------------------------------------|---------------------------------------------------------|
|                                 |                        | aOR (95% CI)                           | aOR (95% CI)                          | aOR (95% CI)                                            |
| <b>Fixed-effects model</b>      |                        |                                        |                                       |                                                         |
| <b>Individual-level factors</b> |                        |                                        |                                       |                                                         |
| <b>Age</b>                      |                        |                                        |                                       |                                                         |
| 15-24                           |                        | 0.80 (0.57-1.08)                       |                                       | 0.75 (0.54-1.04)                                        |
| 25-34                           |                        | Ref                                    |                                       | Ref                                                     |
| ≥35                             |                        | 0.48 (0.24-0.83)*                      |                                       | 0.51 (0.26-0.97)*                                       |
| <b>Education</b>                |                        |                                        |                                       |                                                         |
| No education                    |                        | 2.22 (1.35-3.82)**                     |                                       | 1.99 (1.17-3.39)*                                       |
| Primary                         |                        | 1.52 (0.99-2.63)                       |                                       | 1.33 (0.79-2.23)                                        |
| Secondary                       |                        | 1.61 (1.08-2.54)*                      |                                       | 1.46 (0.93-2.29)                                        |
| Higher                          |                        | Ref                                    |                                       | Ref                                                     |
| <b>Occupation</b>               |                        |                                        |                                       |                                                         |
| Not working                     |                        | Ref                                    |                                       |                                                         |
| Working                         |                        | 0.98 (0.73-1.32)                       |                                       |                                                         |
| <b>Wealth index</b>             |                        |                                        |                                       |                                                         |
| Poorest                         |                        | Ref                                    |                                       | Ref                                                     |
| Poorer                          |                        | 1.20 (0.79-1.86)                       |                                       | 1.46 (0.95-2.25)                                        |
| Middle                          |                        | 1.38 (0.86-2.20)**                     |                                       | 1.65 (1.02-2.68)*                                       |
| Richer                          |                        | 1.13 (0.68-1.82)                       |                                       | 1.39 (0.84-2.32)                                        |
| Richest                         |                        | 1.28 (0.69-2.30)                       |                                       | 1.33 (0.70-2.52)                                        |
| <b>BMI (n=6411)</b>             |                        |                                        |                                       |                                                         |
| Normal                          |                        | Ref                                    |                                       | Ref                                                     |
| Underweight                     |                        | 1.10 (0.80-1.60)                       |                                       | 1.05 (0.72-1.51)                                        |
| Overweight/obesity              |                        | 0.89 (0.59-1.35)                       |                                       | 1.03 (0.65-1.58)                                        |
| <b>Currently pregnant</b>       |                        |                                        |                                       |                                                         |
| No                              |                        | 0.81 (0.42-1.58)                       |                                       | 1.08 (0.53-2.19)                                        |
| Yes                             |                        | Ref                                    |                                       | Ref                                                     |
| <b>Currently breastfeeding</b>  |                        |                                        |                                       |                                                         |

|                                               |  |                    |                     |                    |
|-----------------------------------------------|--|--------------------|---------------------|--------------------|
| No                                            |  | Ref                |                     | Ref                |
| Yes                                           |  | 1.34 (0.63-2.82)   |                     | 1.60 (0.71-3.59)   |
| <b>Total children ever born</b>               |  |                    |                     |                    |
| No child                                      |  | Ref                |                     | Ref                |
| 1-3 child                                     |  | -                  |                     | -                  |
| 4+ child                                      |  | 1.15 (0.75-1.87)   |                     | 1.02 (0.63-1.63)   |
| <b>Current contraceptive use</b>              |  |                    |                     |                    |
| Not using                                     |  | Ref                |                     | Ref                |
| Hormonal                                      |  | 0.65 (0.46-0.92)*  |                     | 0.63 (0.43-0.90)*  |
| Female sterilization                          |  | 3.55 (1.21-10.44)* |                     | 3.61 (1.10-11.84)* |
| Male contraception                            |  | 0.92 (0.17-4.79)   |                     | 0.74 (0.14-3.77)   |
| Traditional                                   |  | 1.10 (0.74-1.63)   |                     | 1.12 (0.74-1.69)   |
| <b>Cigarette/smoking</b>                      |  |                    |                     |                    |
| Smoking                                       |  | 0.89 (0.48-1.66)   |                     | 1.21 (0.63-2.33)   |
| Not smoking                                   |  | Ref                |                     | Ref                |
| <b>MDD-W (n=1131)</b>                         |  |                    |                     |                    |
| Not diverse                                   |  | 1.20 (0.91-1.59)   |                     | 1.03 (0.76-1.40)   |
| Diverse                                       |  | Ref                |                     | Ref                |
| <b>Mosquitoes bed net for sleeping</b>        |  |                    |                     |                    |
| No                                            |  | 0.57 (0.38-0.86)   |                     |                    |
| Yes                                           |  | Ref                |                     |                    |
| <b>Community-level factors</b>                |  |                    |                     |                    |
| <b>Place of residence</b>                     |  |                    |                     |                    |
| Urban                                         |  |                    | Ref                 | Ref                |
| Rural                                         |  |                    | 1.01 (0.83-1.21)    | 0.89 (0.64-1.24)   |
| <b>Province</b>                               |  |                    |                     |                    |
| Province-1                                    |  |                    | 1.70 (1.23-2.34)**  | 2.07 (1.57-5.64)** |
| Province-2                                    |  |                    | 2.51 (1.79-3.53)*** | 2.97 (1.52-5.82)** |
| Bagmati                                       |  |                    | Ref                 | Ref                |
| Gandaki                                       |  |                    | 0.90 (0.64-1.26)    | 0.76 (0.39-1.49)   |
| Province-5                                    |  |                    | 1.60 (1.16-2.21)**  | 2.42 (1.31-4.50)** |
| Karnali                                       |  |                    | 1.19 (0.85-1.66)    | 1.66 (0.88-3.14)   |
| Sudurpaschim                                  |  |                    | 1.54 (1.11-2.15)*   | 1.62 (0.84-3.10)   |
| <b>Community female education<sup>a</sup></b> |  |                    |                     |                    |
| Low                                           |  |                    | 1.39 (1.15-1.68)*** | -                  |
| High                                          |  |                    | Ref                 | -                  |



|                                                                                                                                                                                                                                       |                              |                              |                                 |                             |
|---------------------------------------------------------------------------------------------------------------------------------------------------------------------------------------------------------------------------------------|------------------------------|------------------------------|---------------------------------|-----------------------------|
| <b>Community wealth index<sup>b</sup></b>                                                                                                                                                                                             |                              |                              |                                 |                             |
| Low                                                                                                                                                                                                                                   |                              |                              | 1.48 (1.21-1.80) <sup>***</sup> | -                           |
| High                                                                                                                                                                                                                                  |                              |                              | Ref                             | -                           |
| <b>Source of drinking water (n=6084)</b>                                                                                                                                                                                              |                              |                              |                                 |                             |
| Improved                                                                                                                                                                                                                              |                              |                              | Ref                             | Ref                         |
| Not improved                                                                                                                                                                                                                          |                              |                              | 1.05 (0.84-1.30)                | 1.13 (0.68-1.86)            |
| <b>Type of toilet facility (n=6084)</b>                                                                                                                                                                                               |                              |                              |                                 |                             |
| Improved                                                                                                                                                                                                                              |                              |                              | Ref                             | Ref                         |
| Not improved                                                                                                                                                                                                                          |                              |                              | 1.03 (0.84-1.24)                | 0.96 (0.63-1.45)            |
| <b>Random-effects model</b>                                                                                                                                                                                                           |                              |                              |                                 |                             |
| Community-level variance ( $\tau$ ) (SE)                                                                                                                                                                                              | 0.627 (0.073) <sup>***</sup> | 0.443 (0.192) <sup>***</sup> | 0.414 (0.056) <sup>***</sup>    | 0.347 (0.194) <sup>**</sup> |
| ICC (%)                                                                                                                                                                                                                               | 16                           | 11.8                         | 11.1                            | 9.5                         |
| PCV (%)                                                                                                                                                                                                                               | Ref                          | 29.3                         | 33.9                            | 44.6                        |
| <b>Model fit statistics</b>                                                                                                                                                                                                           |                              |                              |                                 |                             |
| AIC                                                                                                                                                                                                                                   | 8322.6                       | 1554.7                       | 7838.4                          | 1400.6                      |
| BIC                                                                                                                                                                                                                                   | 8336.1                       | 1675.8                       | 7925.8                          | 1559.1                      |
| Model 1 (empty model): without adjusted predictors variables; model 2: adjusted for individual-level factors; model 3: adjusted for community-level factors; model 4: adjusted for both individual-level and community-level factors. |                              |                              |                                 |                             |
| *p<0.05, **p<0.01, ***p<0.001,                                                                                                                                                                                                        |                              |                              |                                 |                             |
| aOR=adjusted odds ratio, CI: confidence interval, Ref: reference category, SE: standard error,                                                                                                                                        |                              |                              |                                 |                             |
| ICC: intra-class correlation, PCV: percentage change in variation, AIC: Akaike information criterion, BIC: Bayesian information criterion                                                                                             |                              |                              |                                 |                             |
| <sup>a</sup> mean percent of households wealth quintiles categorized richer and richest and above                                                                                                                                     |                              |                              |                                 |                             |
| <sup>b</sup> mean percent of women with primary education level and above                                                                                                                                                             |                              |                              |                                 |                             |
| community female education and community wealth index is omitted in Model 4 due to collinearity                                                                                                                                       |                              |                              |                                 |                             |

719

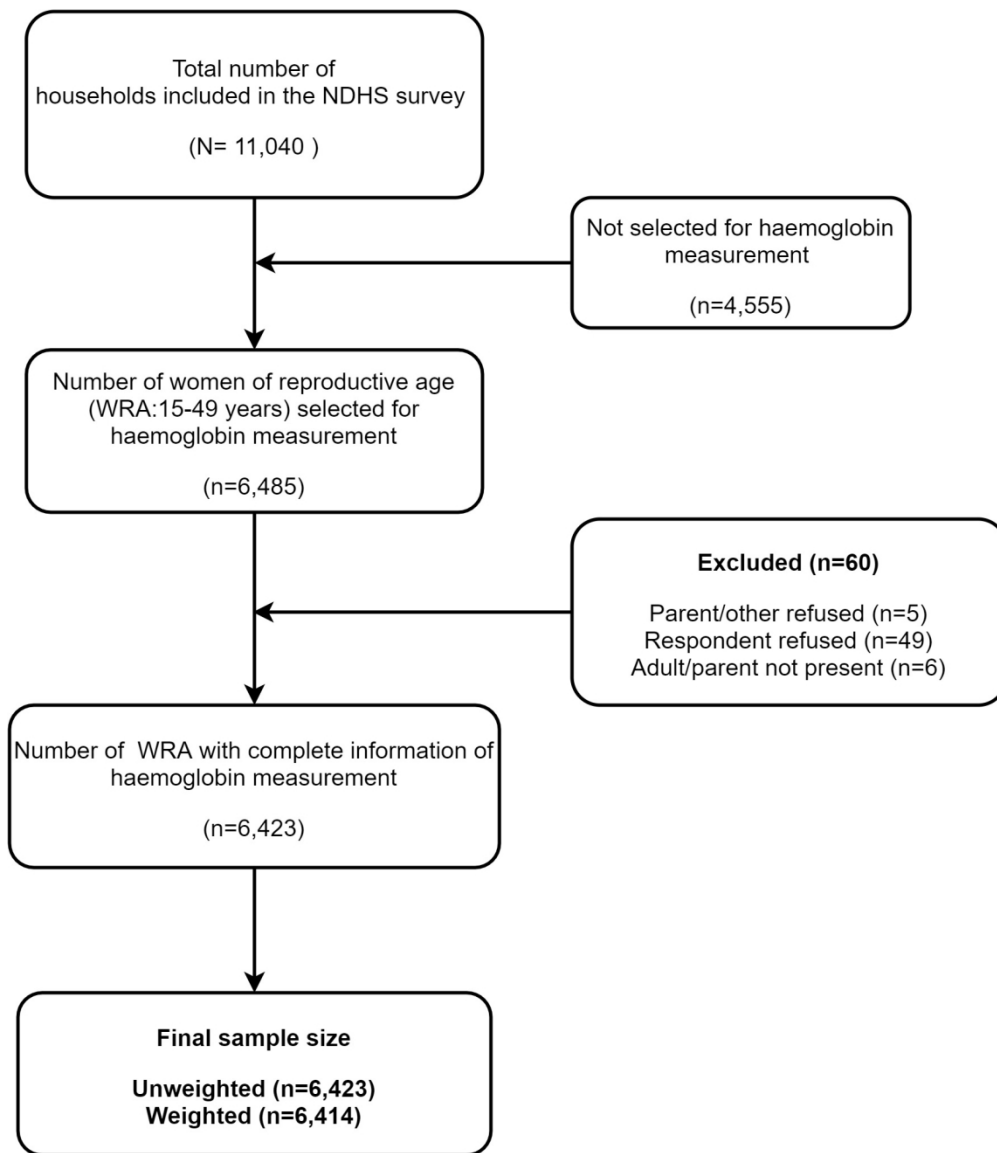

Figure 1 Flow chart for sample size selection

626x717mm (72 x 72 DPI)

1  
2  
3  
4  
5  
6  
7  
8  
9  
10  
11  
12  
13  
14  
15  
16  
17  
18  
19  
20  
21  
22  
23  
24  
25  
26  
27  
28  
29  
30  
31  
32  
33  
34  
35  
36  
37  
38  
39  
40  
41  
42  
43  
44  
45  
46  
47  
48  
49  
50  
51  
52  
53  
54  
55  
56  
57  
58  
59  
60

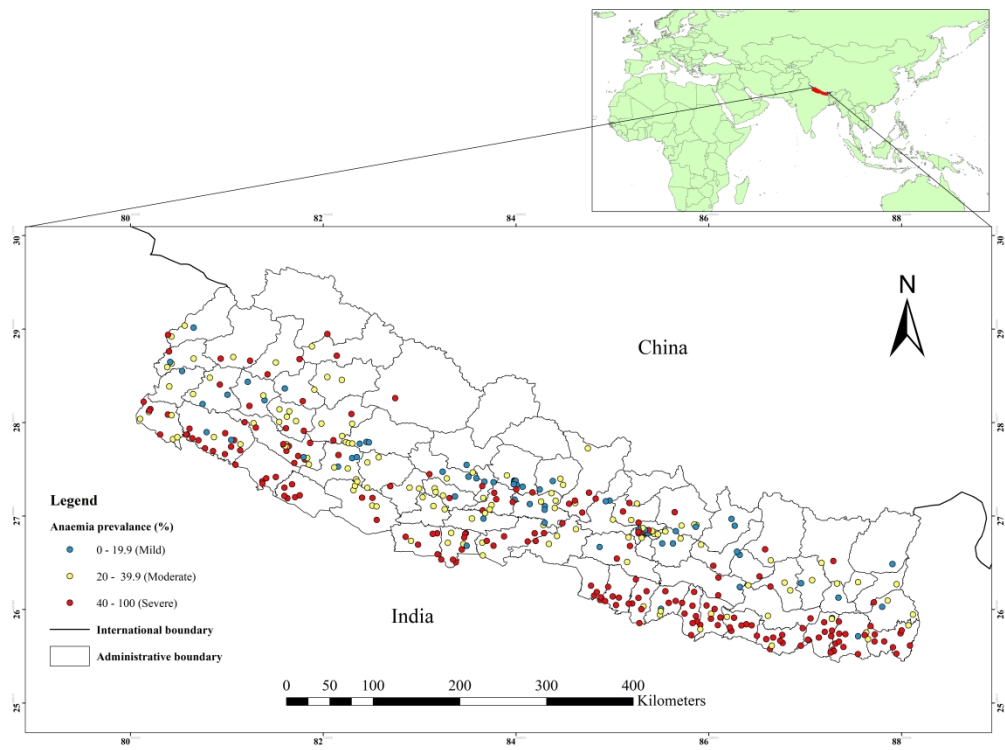

Figure 2 Study area map and observed anaemia prevalence among women of reproductive age for the NDHS survey clusters

609x457mm (300 x 300 DPI)

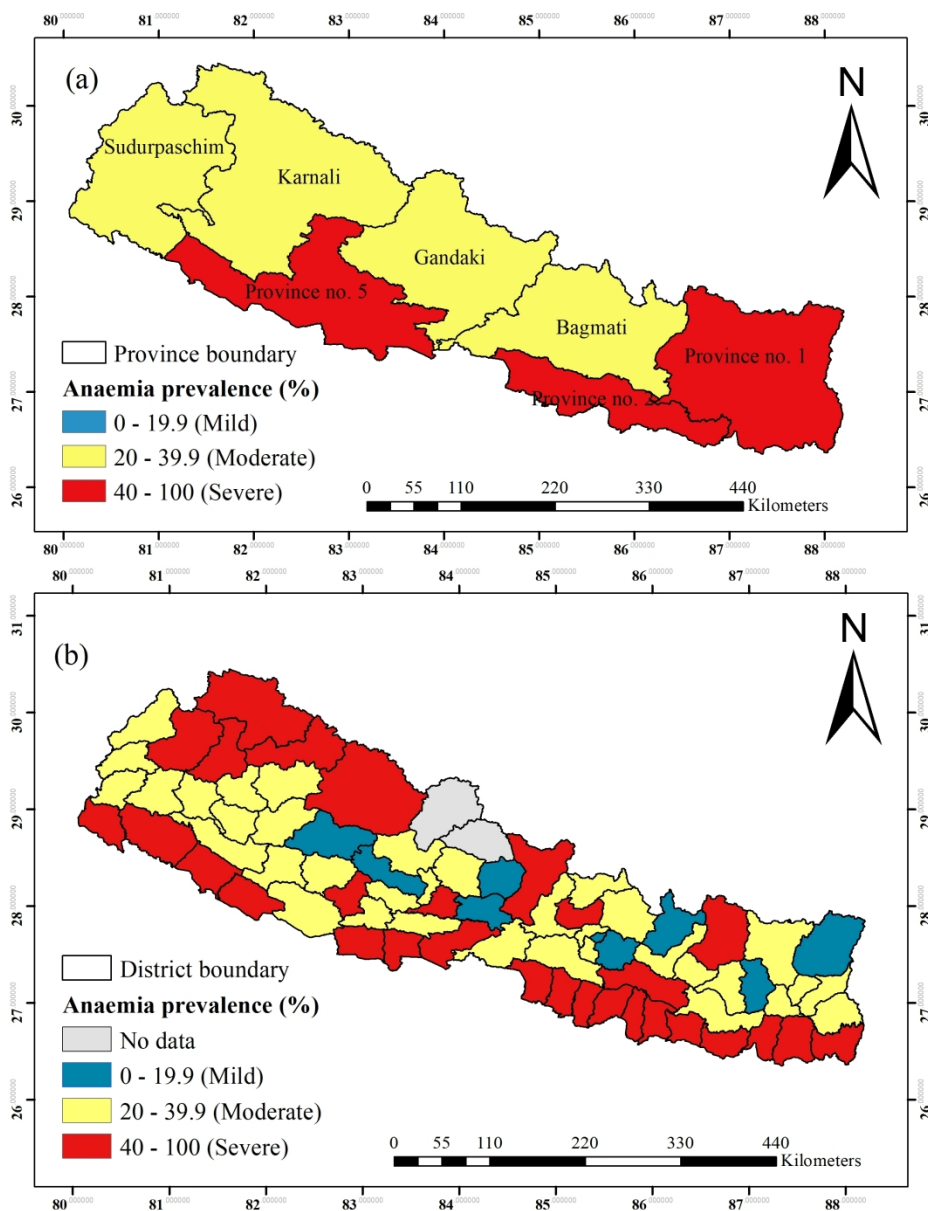

Figure 3 (a) Prevalence of anaemia among women of reproductive age across provinces. 3 (b) Prevalence of anaemia among women of reproductive age across districts

215x279mm (300 x 300 DPI)

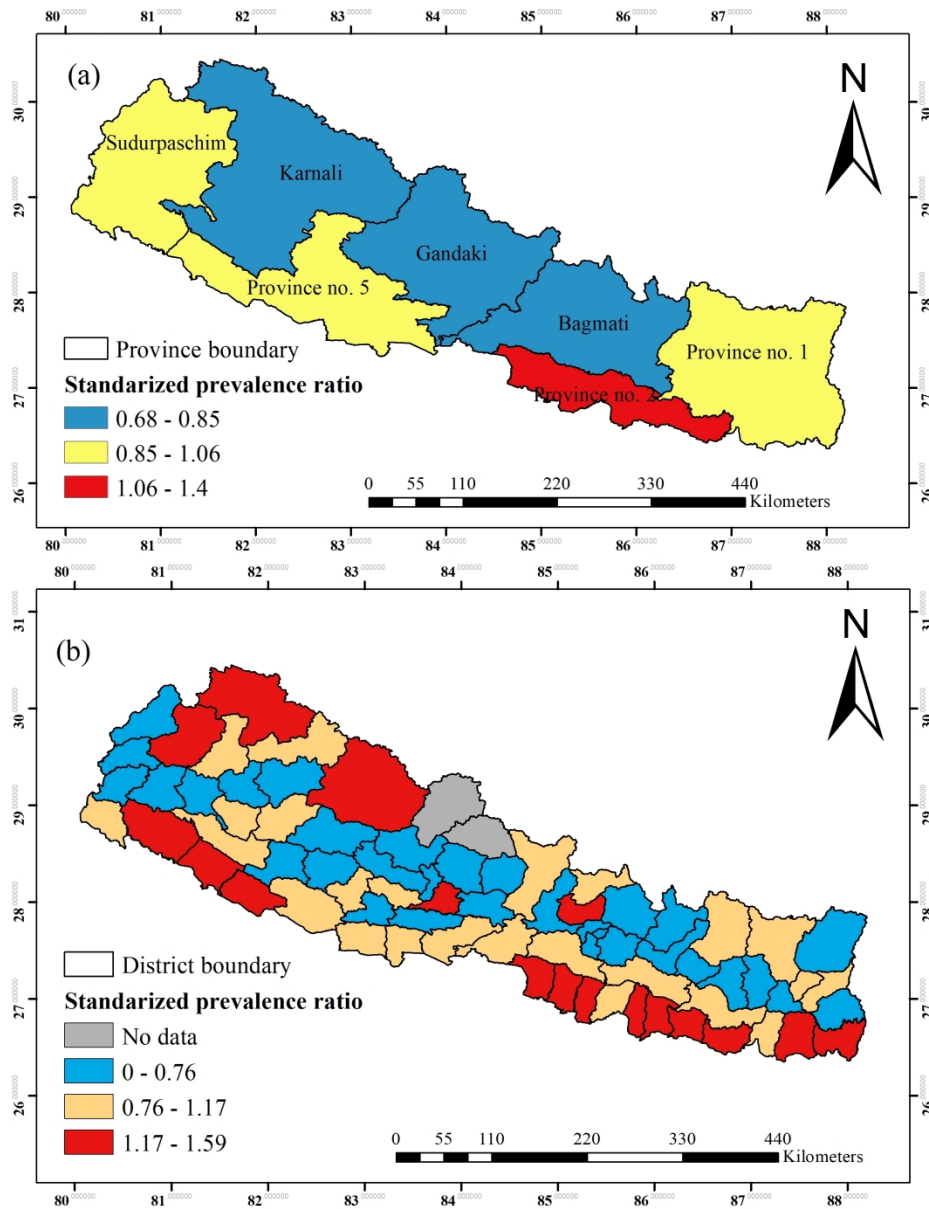

Figure 4 (a) Standardized prevalence ratio of anaemia among women of reproductive age across provinces.  
 4 (b) Standardized prevalence ratio of anaemia among women of reproductive age across districts  
 (standardized to the national mean prevalence of 41%)

215x279mm (300 x 300 DPI)

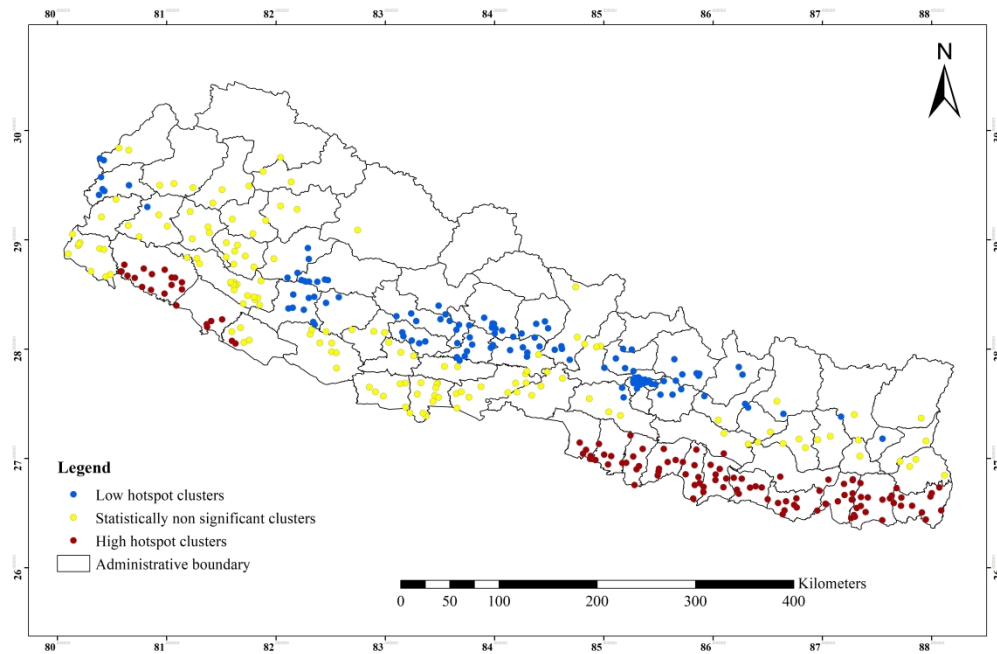

Figure 5 Spatial pattern and distribution of hot and cold spots of anaemia among women of reproductive age at cluster level in Nepal

457x304mm (300 x 300 DPI)

S1 Table Plan for data coding and description of the study variables

| Study variables                             | Coding category for analysis                                                                                                                                                                                                                      |
|---------------------------------------------|---------------------------------------------------------------------------------------------------------------------------------------------------------------------------------------------------------------------------------------------------|
| Age in years                                | 1=15-24; 2=25-34; 3=35-49                                                                                                                                                                                                                         |
| Education                                   | 1=No education; 2=Primary; 3=Secondary; 4=Higher                                                                                                                                                                                                  |
| Occupation                                  | 1= Not working; 2=Working (professional/technical/managerial, clerical, sales/services, agriculture-self-employed, skilled manual, unskilled manual, others )                                                                                     |
| Wealth index                                | 1=Poorest; 2=Poorer; 3=Middle; 4=Richer; 5=Richest                                                                                                                                                                                                |
| Body mass index (BMI)                       | 1=Normal (18.5-24.99); 2=Underweight(<18.5);<br>3=Overweight/Obesity( $\geq 25$ )                                                                                                                                                                 |
| Currently pregnant                          | 1=No; 2=Yes                                                                                                                                                                                                                                       |
| Currently breastfeeding                     | 1=No; 2=Yes                                                                                                                                                                                                                                       |
| Total children ever born                    | 1= No child; 2=1-3 child; 3=4+ child                                                                                                                                                                                                              |
| Current contraceptive use                   | 1=Not using; 2=Hormonal (Pill, Injections, Implants/Norplant's, Emergency contraception); 3=Female sterilization; 4=Male contraception; 5= Traditional (Male condom, periodic abstinence, withdrawal, other traditional, lactational amenorrhea ) |
| Cigarette/smoking                           | 1= Smoking; 2=Not smoking                                                                                                                                                                                                                         |
| Minimum dietary diversity for women (MDD-W) | 1=Not met (consume <5 food groups); 2= Met (Consume $\geq 5$ food groups)                                                                                                                                                                         |
| Mosquitoes bed net for sleeping             | 1= No; 2= Yes                                                                                                                                                                                                                                     |
| Residence                                   | 1=Urban; 2=Rural                                                                                                                                                                                                                                  |
| Province                                    | 1=Province-1; 2=Province-2, 3=Bagmati Province; 4=Gandaki Province; 5=Province-5; 6=Karnali Province; 7=Sudurpaschim Province                                                                                                                     |
| Community female education                  | 1=Low (mean percent of women with lower primary education level was 0-25%); 2=High (mean percent of women with primary education level above 25%)                                                                                                 |
| Community wealth index                      | 1=Low (mean proportion of women from richest (rich, richest) households in the community was 0-21%); 2=High (mean                                                                                                                                 |

|                          |                                                                                                                                                                                                                                                                                                                 |
|--------------------------|-----------------------------------------------------------------------------------------------------------------------------------------------------------------------------------------------------------------------------------------------------------------------------------------------------------------|
|                          | proportion of women from richest (rich, richest) households in the community was above 21%)                                                                                                                                                                                                                     |
| Source of drinking water | 1=Improved (piped water into dwelling, piped water to yard/plot, public tap or standpipe, tube well or borehole, protected dug well-protected spring and rainwater); 2=Not improved (Piped to neighbor, unprotected well, river, dam ponds, lake, and rainwater)                                                |
| Type of toilet facility  | 1=Improved facility (flush toilet, piped sewer system, septic tank, flush/pour flush to pit latrine, ventilated improved pit latrine, pit latrine with slab, and composting toilet); 2=Not improved (flush to somewhere, flush don't know where, pit latrine without slab/open pit, and no facility/bush/field) |



**STROBE 2007 (v4) Statement—Checklist of items that should be included in reports of *cross-sectional studies***

| Section/Topic                | Item # | Recommendation                                                                                                                                                                       | Reported on page # |
|------------------------------|--------|--------------------------------------------------------------------------------------------------------------------------------------------------------------------------------------|--------------------|
| <b>Title and abstract</b>    | 1      | (a) Indicate the study’s design with a commonly used term in the title or the abstract                                                                                               | 1                  |
|                              |        | (b) Provide in the abstract an informative and balanced summary of what was done and what was found                                                                                  | 1-2                |
| <b>Introduction</b>          |        |                                                                                                                                                                                      |                    |
| Background/rationale         | 2      | Explain the scientific background and rationale for the investigation being reported                                                                                                 | 4-5                |
| Objectives                   | 3      | State specific objectives, including any prespecified hypotheses                                                                                                                     | 5                  |
| <b>Methods</b>               |        |                                                                                                                                                                                      |                    |
| Study design                 | 4      | Present key elements of study design early in the paper                                                                                                                              | 5                  |
| Setting                      | 5      | Describe the setting, locations, and relevant dates, including periods of recruitment, exposure, follow-up, and data collection                                                      | 5-6                |
| Participants                 | 6      | (a) Give the eligibility criteria, and the sources and methods of selection of participants                                                                                          | 5-6                |
| Variables                    | 7      | Clearly define all outcomes, exposures, predictors, potential confounders, and effect modifiers. Give diagnostic criteria, if applicable                                             | 6-7                |
| Data sources/<br>measurement | 8*     | For each variable of interest, give sources of data and details of methods of assessment (measurement). Describe comparability of assessment methods if there is more than one group | 8-10               |
| Bias                         | 9      | Describe any efforts to address potential sources of bias                                                                                                                            | 8                  |
| Study size                   | 10     | Explain how the study size was arrived at                                                                                                                                            | 6                  |
| Quantitative variables       | 11     | Explain how quantitative variables were handled in the analyses. If applicable, describe which groupings were chosen and why                                                         | 8                  |
| Statistical methods          | 12     | (a) Describe all statistical methods, including those used to control for confounding                                                                                                | 8-10               |
|                              |        | (b) Describe any methods used to examine subgroups and interactions                                                                                                                  | 8-10               |
|                              |        | (c) Explain how missing data were addressed                                                                                                                                          | 6                  |
|                              |        | (d) If applicable, describe analytical methods taking account of sampling strategy                                                                                                   | NA                 |
|                              |        | (e) Describe any sensitivity analyses                                                                                                                                                | NA                 |
| <b>Results</b>               |        |                                                                                                                                                                                      |                    |

|                          |     |                                                                                                                                                                                                              |       |
|--------------------------|-----|--------------------------------------------------------------------------------------------------------------------------------------------------------------------------------------------------------------|-------|
| Participants             | 13* | (a) Report numbers of individuals at each stage of study—eg numbers potentially eligible, examined for eligibility, confirmed eligible, included in the study, completing follow-up, and analysed            | 10    |
|                          |     | (b) Give reasons for non-participation at each stage                                                                                                                                                         | NA    |
|                          |     | (c) Consider use of a flow diagram                                                                                                                                                                           |       |
| Descriptive data         | 14* | (a) Give characteristics of study participants (eg demographic, clinical, social) and information on exposures and potential confounders                                                                     | 10-11 |
|                          |     | (b) Indicate number of participants with missing data for each variable of interest                                                                                                                          | NA    |
| Outcome data             | 15* | Report numbers of outcome events or summary measures                                                                                                                                                         |       |
| Main results             | 16  | (a) Give unadjusted estimates and, if applicable, confounder-adjusted estimates and their precision (eg, 95% confidence interval). Make clear which confounders were adjusted for and why they were included | 11-14 |
|                          |     | (b) Report category boundaries when continuous variables were categorized                                                                                                                                    | 6     |
|                          |     | (c) If relevant, consider translating estimates of relative risk into absolute risk for a meaningful time period                                                                                             | NA    |
| Other analyses           | 17  | Report other analyses done—eg analyses of subgroups and interactions, and sensitivity analyses                                                                                                               | NA    |
| <b>Discussion</b>        |     |                                                                                                                                                                                                              |       |
| Key results              | 18  | Summarise key results with reference to study objectives                                                                                                                                                     | 14-18 |
| Limitations              | 19  | Discuss limitations of the study, taking into account sources of potential bias or imprecision. Discuss both direction and magnitude of any potential bias                                                   | 18    |
| Interpretation           | 20  | Give a cautious overall interpretation of results considering objectives, limitations, multiplicity of analyses, results from similar studies, and other relevant evidence                                   | 14-18 |
| Generalisability         | 21  | Discuss the generalisability (external validity) of the study results                                                                                                                                        | 18    |
| <b>Other information</b> |     |                                                                                                                                                                                                              |       |
| Funding                  | 22  | Give the source of funding and the role of the funders for the present study and, if applicable, for the original study on which the present article is based                                                | 19    |

\*Give information separately for cases and controls in case-control studies and, if applicable, for exposed and unexposed groups in cohort and cross-sectional studies.

**Note:** An Explanation and Elaboration article discusses each checklist item and gives methodological background and published examples of transparent reporting. The STROBE checklist is best used in conjunction with this article (freely available on the Web sites of PLoS Medicine at <http://www.plosmedicine.org/>, Annals of Internal Medicine at <http://www.annals.org/>, and Epidemiology at <http://www.epidem.com/>). Information on the STROBE Initiative is available at [www.strobe-statement.org](http://www.strobe-statement.org).
