# Supplementary material for: Factors affecting anaemia among women of reproductive age in Nepal: a multilevel and spatial analysis
Source: PubMed Central journal article supplement — BMJ Open. 2021 Mar 29;11(3):e041982. doi: 10.1136/bmjopen-2020-041982 (PMC8009228; doi:10.1136/bmjopen-2020-041982), 2021-03-29
Supplement: bmjopen-2020-041982supp001.pdf [file bmjopen-2020-041982supp001.pdf]

**S1 Table Plan for data coding and description of the study variables**

| <b>Study variables</b>                      | <b>Coding category for analysis</b>                                                                                                                                                                                                               |
|---------------------------------------------|---------------------------------------------------------------------------------------------------------------------------------------------------------------------------------------------------------------------------------------------------|
| Age in years                                | 1=15-24; 2=25-34; 3=35-49                                                                                                                                                                                                                         |
| Education                                   | 1=No education; 2=Primary; 3=Secondary; 4=Higher                                                                                                                                                                                                  |
| Occupation                                  | 1= Not working; 2=Working (professional/technical/managerial, clerical, sales/services, agriculture-self-employed, skilled manual, unskilled manual, others )                                                                                     |
| Wealth index                                | 1=Poorest; 2=Poorer; 3=Middle; 4=Richer; 5=Richest                                                                                                                                                                                                |
| Body mass index (BMI)                       | 1=Normal (18.5-24.99); 2=Underweight(<18.5);<br>3=Overweight/Obesity(≥25)                                                                                                                                                                         |
| Currently pregnant                          | 1=No; 2=Yes                                                                                                                                                                                                                                       |
| Currently breastfeeding                     | 1=No; 2=Yes                                                                                                                                                                                                                                       |
| Total children ever born                    | 1= No child; 2=1-3 child; 3=4+ child                                                                                                                                                                                                              |
| Current contraceptive use                   | 1=Not using; 2=Hormonal (Pill, Injections, Implants/Norplant's, Emergency contraception); 3=Female sterilization; 4=Male contraception; 5= Traditional (Male condom, periodic abstinence, withdrawal, other traditional, lactational amenorrhea ) |
| Cigarette/smoking                           | 1= Smoking; 2=Not smoking                                                                                                                                                                                                                         |
| Minimum dietary diversity for women (MDD-W) | 1=Not met (consume <5 food groups); 2= Met (Consume ≥5 food groups)                                                                                                                                                                               |
| Mosquitoes bed net for sleeping             | 1= No; 2= Yes                                                                                                                                                                                                                                     |
| Residence                                   | 1=Urban; 2=Rural                                                                                                                                                                                                                                  |
| Province                                    | 1=Province-1; 2=Province-2, 3=Bagmati Province; 4=Gandaki Province; 5=Province-5; 6=Karnali Province; 7=Sudurpaschim Province                                                                                                                     |
| Community female education                  | 1=Low (mean percent of women with lower primary education level was 0-25%); 2=High (mean percent of women with primary education level above 25%)                                                                                                 |
| Community wealth index                      | 1=Low (mean proportion of women from richest (rich, richest) households in the community was 0-21%); 2=High (mean                                                                                                                                 |

|                          |                                                                                                                                                                                                                                                                                                                 |
|--------------------------|-----------------------------------------------------------------------------------------------------------------------------------------------------------------------------------------------------------------------------------------------------------------------------------------------------------------|
|                          | proportion of women from richest (rich, richest) households in the community was above 21%)                                                                                                                                                                                                                     |
| Source of drinking water | 1=Improved (piped water into dwelling, piped water to yard/plot, public tap or standpipe, tube well or borehole, protected dug well-protected spring and rainwater); 2=Not improved (Piped to neighbor, unprotected well, river, dam ponds, lake, and rainwater)                                                |
| Type of toilet facility  | 1=Improved facility (flush toilet, piped sewer system, septic tank, flush/pour flush to pit latrine, ventilated improved pit latrine, pit latrine with slab, and composting toilet); 2=Not improved (flush to somewhere, flush don't know where, pit latrine without slab/open pit, and no facility/bush/field) |
